# Supplementary material for: Chondrocytes in the resting zone of the growth plate are maintained in a Wnt-inhibitory environment
Source: eLife. 2021 Jul 26;10:e64513. doi: 10.7554/eLife.64513 (PMC8313235; doi:10.7554/eLife.64513)
Supplement: Figure 1—source data 1. [file elife-64513-fig1-data1.xlsx]

## Sheet: Figure 1b, middle
Figure 1b, middle	CTCF quantification
P35
Mouse Number
8	Area	Mean	Min	Max	IntDen	CTCF
1 (TOP)	2274	196.413	20	255	446644	374012
2	2688	159.787	16	255	429508	343652
3	1381	171.173	26	255	236390	192280
4	1464	121.225	13	255	177473	130712
5	2537	102.241	12	200	259385	178352
6	2171	74.713	11	178	162201	92858.5
7	2922	122.528	5	255	358027	264697
8	3687	81.314	9	191	299805	182041
9	2697	59.217	12	155	159707	73563.9
10	3087	68.415	11	172	211198	112598
11	2272	42.195	10	117	95867	23298.6
12	2828	59.821	11	146	169175	78847.7
13	1685	49.44	10	110	83306	29486.5
14	1824	41.637	15	97	75945	17685.8
15	2513	42.965	11	109	107970	27703.9
16	2818	62.623	11	167	176472	86464.1
17	3261	67.92	16	165	221488	117331
18	2768	45.074	7	101	124765	36354.2
19	2964	43.577	11	116	129163	34491.9
20	3154	55.785	9	155	175947	75207.2
21	3337	56.805	16	152	189558	82973.1
22	3230	39.659	10	100	128100	24932.7
23	2533	43.985	9	118	111414	30509.1
24	3522	46.589	8	133	164087	51593.1
25	1823	38.585	12	83	70340	12112.8
26	3439	51.767	10	107	178028	68185.2
27 (BOTTOM)	2583	62.467	13	147	161352	78850.1
	8	No	Area	Mean	Min	Max	IntDen
Background	2-1	3	876	25.134	20	33	22017
	2-2	3	1977	33.693	19	55	66611
	2-3	3	1583	36.639	28	48	57999
	2-4	3	851	27.854	21	35	23704
	2-5	3	1630	28.184	19	37	45940
	2-6	3	1336	40.138	33	47	53625
			Average	31.9403
