# Supplementary material for: Chondrocytes in the resting zone of the growth plate are maintained in a Wnt-inhibitory environment
Source: eLife. 2021 Jul 26;10:e64513. doi: 10.7554/eLife.64513 (PMC8313235; doi:10.7554/eLife.64513)
Supplement: Figure 1—source data 2. [file elife-64513-fig1-data2.xlsx]

## Sheet: Figure 1c
Figure 1c.	CTCF quantification
P35
Mouse Number	5	No	Area	Mean	Min	Max	IntDen	CTCF	CTCF (HI)	CTCF (LOW)	Averages			Compiled (RAW)
Tibia	2-1 (HI)	1	2175	144.937	33	255	315237	243999	243999	62369.9	CTCF (HI)			CTCF (HI)	CTCF (LOW)
	2-1 (LOW)	2	1380	77.949	25	189	107569	62369.9	202587	63402.5	180537			243999	62369.9
	2-2 (HI)	1	2026	132.747	13	255	268945	202587	205773	94659	CTCF (LOW)			202587	63402.5
	2-2 (LOW)	2	2577	57.356	9	212	147807	63402.5	179332	74587.4	87567.4			205773	94659
	2-3 (HI)	1	3167	97.727	12	255	309502	205773	110720	92886.6	Fold change			179332	74587.4
	2-3 (LOW)	2	3085	63.437	15	202	195702	94659	140808	137499	2.06169			110720	92886.6
	2-4 (HI)	1	2177	115.129	25	255	250635	179332						140808	137499
	2-4 (LOW)	2	2115	68.019	14	160	143860	74587.4						201888	116511
	2-5 (HI)	1	3291	66.396	7	188	218510	110720						307547	149840
	2-5 (LOW)	2	2549	69.193	15	199	176374	92886.6						503353	353780
	2-6 (HI)	1	4985	60.999	11	192	304082	140808						440435	245286
	2-6 (LOW)	2	3595	71	22	189	255246	137499						258270	118711
														150335	32433.9
	5	No	Area	Mean	Min	Max	IntDen							196207	56438.5
Background	2-1	3	1551	61.126	48	77	94806							216068	143055
	2-2	3	2206	34.405	22	50	75897							357870	187345
	2-3	3	2999	33.198	18	47	99560							190229	45991.2
	2-4	3	3870	27.845	14	54	107760							196630	50617.7
	2-5	3	2851	24.59	15	41	70106							207115	101247
	2-6	3	2439	15.354	11	23	37448							287527	131240
			Average	32.753										502869	302329
														290188	82627.2
P35														295800	188035
Mouse Number	6	No	Area	Mean	Min	Max	IntDen	CTCF	CTCF (HI)	CTCF (LOW)	Averages			423740	239217
Tibia	2-1 (HI)	1	1740	143.294	26	255	249332	201888	201888	116511	CTCF (HI)			303137	95300.6
	2-1 (LOW)	2	2404	75.732	32	169	182060	116511	307547	149840	310305
	2-2 (HI)	1	5149	86.996	13	246	447944	307547	503353	353780	CTCF (LOW)			Compiled (AVE)
	2-2 (LOW)	2	4832	58.277	10	205	281593	149840	440435	245286	169427			CTCF (HI)	CTCF (LOW)
	2-3 (HI)	1	4377	142.266	16	255	622700	503353	258270	118711	Fold change			159158	99908
	2-3 (LOW)	2	4970	98.45	11	255	489296	353780	150335	32433.9	1.8315			338098	187552
	2-4 (HI)	1	5072	114.103	10	255	578732	440435						237961	96300.2
	2-4 (LOW)	2	3198	103.967	7	255	332485	245286						328216	151295
	2-5 (HI)	1	2502	130.492	6	255	326492	258270					AVE	267185	131892
	2-5 (LOW)	2	1602	101.368	24	206	162392	118711					STDEV	109458	83344.8
	2-6 (HI)	1	4121	63.747	9	161	262702	150335						AVE FOLD	2.02578
	2-6 (LOW)	4	3257	37.225	7	76	121242	32433.9						P value	<0.0001
	6	No	Area	Mean	Min	Max	IntDen
Background	2-1	3	2381	37.229	19	82	88642
	2-2	3	988	22.25	15	31	21983
	2-3	3	1140	22.196	18	29	25304
	2-4	3	1820	14.139	4	25	25733
	2-5	5	671	24.893	17	34	16703
	2-6	3	1177	42.894	33	53	50486
			Average	27.2668
P35
Mouse Number	7	No	Area	Mean	Min	Max	IntDen	CTCF	CTCF (HI)	CTCF (LOW)	Averages
Tibia	2-1 (HI)	1	2858	104.494	13	255	298644	196207	196207	56438.5	CTCF (HI)
	2-1 (LOW)	2	3513	51.908	13	157	182352	56438.5	216068	143055	227353
	2-2 (HI)	1	2746	114.527	7	255	314491	216068	357870	187345	CTCF (LOW)
	2-2 (LOW)	2	2595	90.969	10	206	236065	143055	190229	45991.2	97449
	2-3 (HI)	1	5613	99.6	14	255	559052	357870	196630	50617.7	Fold change
	2-3 (LOW)	2	4724	75.5	11	193	356663	187345	207115	101247	2.33305
	2-4 (HI)	1	3848	85.278	13	228	328150	190229
	2-4 (LOW)	2	3144	50.47	14	133	158679	45991.2
	2-5 (HI)	1	3254	96.269	6	255	313260	196630
	2-5 (LOW)	2	2355	57.336	6	148	135026	50617.7
	2-6 (HI)	1	2687	112.923	16	255	303423	207115
	2-6 (LOW)	2	1959	87.525	13	184	171462	101247
	7	No	Area	Mean	Min	Max	IntDen
Background	2-1	3	1204	37.517	26	50	45170
	2-2	3	809	36.737	31	43	29720
	2-3	3	1402	42.598	34	52	59723
	2-4	3	802	35.082	25	43	28136
	2-5	3	690	31.152	26	38	21495
	2-6	4	902	31.967	20	68	28834
			Average	35.8422
P35
Mouse Number	8	No	Area	Mean	Min	Max	IntDen	CTCF	CTCF (HI)	CTCF (LOW)	Averages
Tibia	2-1 (HI)	1	3256	120.247	20	255	391525	287527	287527	131240	CTCF (HI)
	2-1 (LOW)	2	3843	66.091	13	171	253987	131240	502869	302329	350544
	2-2 (HI)	1	4314	148.507	24	255	640660	502869	290188	82627.2	CTCF (LOW)
	2-2 (LOW)	2	3481	118.791	19	255	413513	302329	295800	188035	173125
	2-3 (HI)	1	3003	128.573	8	255	386105	290188	423740	239217	Fold change
	2-3 (LOW)	2	3356	56.561	12	148	189819	82627.2	303137	95300.6	2.0248
	2-4 (HI)	1	3961	106.619	5	255	422316	295800
	2-4 (LOW)	2	3641	83.584	9	191	304330	188035
	2-5 (HI)	1	4334	129.711	11	255	562169	423740
	2-5 (LOW)	2	4381	86.544	18	186	379148	239217
	2-6 (HI)	1	3149	128.205	9	255	403717	303137
	2-6 (LOW)	2	2793	66.062	11	144	184510	95300.6
	8	No	Area	Mean	Min	Max	IntDen
Background	2-1	3	876	25.134	20	33	22017
	2-2	3	1977	33.693	19	55	66611
	2-3	3	1583	36.639	28	48	57999
	2-4	3	851	27.854	21	35	23704
	2-5	3	1630	28.184	19	37	45940
	2-6	3	1336	40.138	33	47	53625
			Average	31.9403
