# Supplementary material for: Chondrocytes in the resting zone of the growth plate are maintained in a Wnt-inhibitory environment
Source: eLife. 2021 Jul 26;10:e64513. doi: 10.7554/eLife.64513 (PMC8313235; doi:10.7554/eLife.64513)
Supplement: Figure 3—source data 1. [file elife-64513-fig3-data1.xlsx]

## Sheet: Figure 3b
Figure 3b.	tdTom quantification
P49	Biological replicates (sum)	Mean	STDEV	P value (GP [intact] vs GP [post-collagenase])
GP (Intact)	1165	1315	171.232	0.0028
	1279
	1371
	1132
	1078
	1369
	1515
	1338
	1588
GP (Post-Collagenase)	0	49.75	99.5
	0
	0
	199
P49	Biological replicates (sum)	Mean	STDEV	P value (AC [intact] vs AC [post-collagenase])
AC (Intact)	30	79.1111	50.3325	0.3333
	69
	27
	78
	109
	53
	65
	87
	194
AC (Post-Collagenase)	50	85.75	45.1839
	59
	84
	150
P49	Biological replicates (sum)	Mean	STDEV	P value (GP [intact] vs AC [intact])
GP (Intact)	1165	1315	171.232	<0.0001
	1279
	1371
	1132
	1078
	1369
	1515
	1338
	1588
AC (Intact)	30	79.1111	50.3325
	69
	27
	78
	109
	53
	65
	87
	194
