# Supplementary material for: Chondrocytes in the resting zone of the growth plate are maintained in a Wnt-inhibitory environment
Source: eLife. 2021 Jul 26;10:e64513. doi: 10.7554/eLife.64513 (PMC8313235; doi:10.7554/eLife.64513)
Supplement: Figure 4—source data 1. [file elife-64513-fig4-data1.xlsx]

## Sheet: Figure 4c
Figure 4c.
Time point (week)	% > 104 (biological replicates)									Mean	Median	Standard Deviation
0	92.3	92.4	90	84.4	82.2	87.9	87.8	77.9	82.6	86.3889	87.8	4.95365
1	49.8	50.5	46.1	44	58.9	40	43.5	39.2	56.1	47.5667	46.1	6.83301
2	25.7	31.4	28.7	19.2	18.8	18.4	23.1			23.6143	23.1	5.17926
3	17.1	21.4	18.2	14.3	15.1	11.9				16.3333	16.1	3.31823
4	10.3	11.7	10	10.5	7.75	11.1				10.225	10.4	1.35637
5	4.29	6.91	4.89	4.34	4.69	5.76	5.01			5.12714	4.89	0.927411
6	4.83	3.93	5.55	4.4	5.1					4.762	4.83	0.625116
7	2.96	5.28	2.48							3.57333	2.96	1.49738
8	2.6	2.76	3.84							3.06667	2.76	0.674487
10	2.26	3.03	2.56							2.61667	2.56	0.388115
12	1.9	2.13	2.66							2.23	2.13	0.389744
