# Supplementary material for: Chondrocytes in the resting zone of the growth plate are maintained in a Wnt-inhibitory environment
Source: eLife. 2021 Jul 26;10:e64513. doi: 10.7554/eLife.64513 (PMC8313235; doi:10.7554/eLife.64513)
Supplement: Figure 4—source data 2. [file elife-64513-fig4-data2.xlsx]

## Sheet: Figure 4e
Figure 4e.	% EdU incorporation in LRCs vs non-LRCs (flow)
P28 (+1 week)	Biological replicates	Mean	Standard Deviation	P value
non-LRCs	5.55	7.03833	2.29913	0.0022
	5.29
	10.7
	9.07
	5.26
	6.36
LRCs	3.05	2.04333	1.66823
	0.58
	4.36
	2.91
	0
	1.36
P35 (+2 weeks)	Biological replicates	Mean	Standard Deviation	P value
non-LRCs	3.19	2.80375	0.999042	0.0047
	1.71
	4.02
	2.74
	1.01
	2.96
	3.08
	3.72
LRCs	0.38	1.13375	0.744963
	0.42
	0.71
	1.43
	0.39
	2.16
	1.6
	1.98
P49 (+4 weeks)	Biological replicates	Mean	Standard Deviation	P value
non-LRCs	6.46	4.3375	1.88899	0.2
	3.04
	2.48
	5.37
LRCs	2.98	2.4025	0.845986
	1.89
	1.49
	3.25
