# Supplementary material for: Chondrocytes in the resting zone of the growth plate are maintained in a Wnt-inhibitory environment
Source: eLife. 2021 Jul 26;10:e64513. doi: 10.7554/eLife.64513 (PMC8313235; doi:10.7554/eLife.64513)
Supplement: Figure 5—source data 1. [file elife-64513-fig5-data1.xlsx]

## Sheet: Figure 5f
Figure 5f
Time Point	% LacZ+EdU+						Mean	Standard Deviation	P value	95% CI
P7	14.9407	18.9357	19.9734				17.9499	2.65723	0.0238	9.76604
P28	68.75	90.3226	66.6667	83.7838	84.6154	71.4286	77.5945	8.9932		8.29875
