# Supplementary material for: Chondrocytes in the resting zone of the growth plate are maintained in a Wnt-inhibitory environment
Source: eLife. 2021 Jul 26;10:e64513. doi: 10.7554/eLife.64513 (PMC8313235; doi:10.7554/eLife.64513)
Supplement: Figure 6—source data 1. [file elife-64513-fig6-data1.xlsx]

## Sheet: Figure 6 (e-h)
Figure 6e.	Ctnnb Protein in Resting Zone
Time Point	Genotype	Biological Replicates (sum)	Mean	Standard Deviation	P value
P15	rp909; ++; Tm+	32	62.125	33.2826	0.0286
		60
		47.5
		109
	rp909; APC f+; Tm+	362	283.875	65.7525
		201.5
		292
		280
Figure 6f.	Resting Chondrocytes
Time Point	Genotype	Biological Replicates (sum)	Mean	Standard Deviation	P value		Figure 6g.	Short Columns						Figure 6h.	Long Columns
P9	rp909; ++; Tm+	602	718.667	132.681	0.0357		Time Point	Genotype	Biological Replicates (sum)	Mean	Standard Deviation	P value		Time Point	Genotype	Biological Replicates (mean)	Mean	Standard Deviation	P value
		863					P12	rp909; ++; Tm+	9.5	19.5	7.05927	0.2		P21	rp909; ++; Tm+	31.5	43.875	23.1998	0.8857
		691							26							40.5
	rp909; APC f+; Tm+	458.5	474.8	134.821					20.5							77.5
		499							22							26
		574						rp909; APC f+; Tm+	12.5	11.625	5.02286				rp909; APC f+; Tm+	25.5	33.875	6.70044
		589							6							32.5
		253.5							18							36
P12	rp909; ++; Tm+	644	910.325	209.945	0.0286				10							41.5
		1150					P21	rp909; ++; Tm+	61	67.5	10.4083	0.0286		P36	rp909; ++; Tm+	25.5	36.125	34.0034	0.6857
		881.8							59							9.5
		965.5							82							23.5
	rp909; APC f+; Tm+	594.75	558.438	64.2684					68							86
		462.5						rp909; APC f+; Tm+	45	46.75	7.63217				rp909; APC f+; Tm+	41	42	14.8549
		595							42							48
		581.5							42							57
P21	rp909; ++; Tm+	589.5	655.325	124.97	0.0286				58							22
		518					P36	rp909; ++; Tm+	22.5	27.5	19.4422	0.3429		P96	rp909; ++; Tm+	12	29.75	12.816	0.0286
		795.8							10.5							35
		718							21.5							42
	rp909; APC f+; Tm+	448.75	456.812	27.1488					55.5							30
		438						rp909; APC f+; Tm+	46.5	36.375	8.87295				rp909; APC f+; Tm+	5	7.5	2.64575
		443.5							39.5							8
		497							34							11
P36	rp909; ++; Tm+	116	200.25	187.158	0.3429				25.5							6
		62					P96	rp909; ++; Tm+	48	44.25	11.0868	0.3429
		147							48
		476							53
	rp909; APC f+; Tm+	301	276.5	72.4051					28
		284.5						rp909; APC f+; Tm+	40	43	6.08276
		345.5							50
		175							39
P96	rp909; ++; Tm+	82	116.125	48.4878	0.0571
		188
		95
		99.5
	rp909; APC f+; Tm+	63	60.8333	2.5658
		58
		61.5
