# Supplementary material for: Chondrocytes in the resting zone of the growth plate are maintained in a Wnt-inhibitory environment
Source: eLife. 2021 Jul 26;10:e64513. doi: 10.7554/eLife.64513 (PMC8313235; doi:10.7554/eLife.64513)
Supplement: Supplementary file 1. — Comparative RNA-seq analysis of LRCs and non-LRCs, rlog normalized count values for each biological sample of LRCs (High1_50032, High2_53561, High3_53563) and non-LRCs (Low1_50033, Low2_53562, Low3_53564). Provided is a table of differential expression (DE) statistics, rlog counts per sample, as well as standard deviation and mean across sample counts in rlog scale. This table was used for generating all heatmaps, including restricting only to differentially expressed genes, to input DE statistics for GO term enrichment, and intersected with KEGG gene sets from iPathway Guide for STRING analysis. [file elife-64513-supp1.xlsx]

## Sheet: Col2Q_combined_pairedDE_allrlog
genes	High1_50032.rlogCounts	High2_53561.rlogCounts	High3_53563.rlogCounts	Low1_50033.rlogCounts	Low2_53562.rlogCounts	Low3_53564.rlogCounts	baseMean	log2FoldChange	lfcSE	stat	pvalue	padj	SD	MeanExp
0610005C13Rik	1.08235	1.08264	1.1007	1.10521	1.08248	1.09044	2.13356	-0.608925	3.8665	-0.157487	0.874861	NA	0.010128	1.09064
0610007C21Rik	11.6285	12.343	12.051	12.0969	12.7451	12.3793	4921.97	-0.487242	0.166905	-2.91928	0.00350841	0.0328192	0.376548	12.2073
0610007L01Rik	13.1574	12.6328	12.8158	12.4778	12.2258	12.5208	6566.16	0.55229	0.182021	3.03421	0.00241164	0.0250094	0.319612	12.6384
0610007N19Rik	10.1744	10.4332	10.3399	10.6535	11.0706	10.7076	1569.05	-0.681483	0.228043	-2.9884	0.00280446	0.0280262	0.317633	10.5632
0610007P08Rik	10.2232	9.43842	10.0816	10.1939	9.73411	10.4306	1086.82	-0.309649	0.274674	-1.12733	0.259602	0.531851	0.364381	10.017
0610007P14Rik	10.069	10.8362	10.4985	10.3601	10.7934	10.7505	1547.03	-0.234886	0.239715	-0.979856	0.327157	0.598622	0.300484	10.5513
0610007P22Rik	9.31233	9.48242	9.17543	9.14545	9.29406	9.2364	624.033	0.169198	0.315727	0.535898	0.592029	0.795097	0.120802	9.27435
0610008F07Rik	-0.667835	-0.666316	-0.667809	-0.667833	-0.663295	-0.660574	0.568504	-1.73259	4.01403	-0.431633	0.666008	NA	0.00303122	-0.66561
0610009B14Rik	0	0	0	0	0	0	0	NA	NA	NA	NA	NA	0	0
0610009B22Rik	8.40995	8.91997	8.54234	9.01057	9.25684	9.03821	492.034	-0.926962	0.3623	-2.55855	0.010511	0.0732649	0.322152	8.86298
0610009D07Rik	10.5784	11.4511	10.8983	11.2358	11.8983	11.3656	2576.96	-0.676657	0.19862	-3.40679	0.00065731	0.00962584	0.457835	11.2379
0610009L18Rik	7.46618	8.18666	7.52276	7.79879	8.12316	7.51075	239.198	-0.276529	0.516542	-0.535346	0.592411	0.795454	0.322422	7.76805
0610009O20Rik	8.43048	8.86122	8.54527	8.62708	8.63096	8.41519	391.114	0.105941	0.408494	0.259345	0.795369	0.90662	0.163996	8.58503
0610010B08Rik	5.17609	5.17863	5.16123	5.18513	5.17879	5.16833	36.1295	-0.0632938	1.03627	-0.0610787	0.951297	0.979481	0.00854133	5.1747
0610010F05Rik	10.2945	9.70709	10.0782	10.0644	10.008	10.3605	1108.26	-0.177013	0.297891	-0.594222	0.552363	0.769637	0.231949	10.0854
0610010K14Rik	8.82623	9.76071	9.13672	9.01793	9.43968	9.10807	629.741	0.0703881	0.345462	0.20375	0.838549	0.929187	0.333413	9.21489
0610010O12Rik	7.71951	8.50567	7.72773	7.43661	7.81492	7.62283	253.814	0.907025	0.499168	1.81707	0.069206	0.248993	0.366937	7.80454
0610011F06Rik	7.79731	8.50153	8.0317	8.02487	8.10835	8.07608	284.815	0.0376941	0.507593	0.0742604	0.940803	0.975546	0.229432	8.08997
0610011L14Rik	10.2451	10.3745	10.0499	9.81914	9.9992	9.88326	1088.6	0.47911	0.257189	1.86287	0.0624801	0.233591	0.212686	10.0618
0610012G03Rik	9.14494	9.8089	9.20748	9.63628	10.2102	9.78835	850.443	-0.784232	0.27578	-2.84369	0.0044594	0.0394571	0.401865	9.63269
0610012H03Rik	0	0	0	0	0	0	0	NA	NA	NA	NA	NA	0	0
0610030E20Rik	9.72605	10.0348	9.62003	9.8442	10.0626	9.42925	905.261	0.0269244	0.279953	0.0961747	0.923382	0.967465	0.245016	9.78614
0610031J06Rik	11.1291	11.2847	11.0102	10.6153	11.0716	10.749	2055.92	0.43798	0.217607	2.01271	0.0441452	0.188799	0.249279	10.9766
0610031O16Rik	0	0	0	0	0	0	0	NA	NA	NA	NA	NA	0	0
0610037L13Rik	10.9611	11.1722	11.1433	11.1273	11.4752	11.3268	2378.59	-0.282886	0.195078	-1.45012	0.147025	0.389096	0.177875	11.201
0610037P05Rik	10.4071	10.3655	10.6618	11.0981	11.2888	11.2136	1935.42	-0.964267	0.227176	-4.24458	2.19e-05	0.000626103	0.412787	10.8391
0610038B21Rik	3.87373	3.8098	3.86772	3.90109	3.83454	3.89781	14.6697	-1.43236	1.85565	-0.771896	0.440176	0.693261	0.0358704	3.86411
0610038L08Rik	0	0	0	0	0	0	0	NA	NA	NA	NA	NA	0	0
0610039K10Rik	-0.215124	-0.218731	-0.219857	-0.21098	-0.219851	-0.216141	0.805706	-0.81636	3.95785	-0.206263	0.836585	NA	0.00344938	-0.216781
0610040B10Rik	4.90182	4.83167	4.84939	5.00403	5.16904	4.9705	33.2533	-3.38582	1.52176	-2.22493	0.0260858	0.136235	0.124618	4.95441
0610040F04Rik	3.64007	3.58093	3.65608	3.63457	3.60067	3.65035	12.4261	-0.828979	1.95718	-0.423558	0.671888	NA	0.0297818	3.62711
0610040J01Rik	3.62908	3.5763	3.62113	3.57466	3.66916	3.66445	12.542	-0.83755	2.72318	-0.307563	0.758415	NA	0.0410023	3.62246
0610043K17Rik	5.73203	6.88168	5.9104	5.87017	5.82434	5.91458	93.5171	0.507491	1.13591	0.44677	0.655041	0.83596	0.426439	6.0222
0910001L09Rik	8.08294	8.51066	8.35288	8.57356	9.35237	8.81719	440.924	-1.1908	0.36973	-3.22074	0.00127859	0.0157543	0.435659	8.61493
100043387	5.76832	5.53125	5.76143	5.78887	5.71592	5.74376	53.7476	-1.07058	1.17462	-0.911432	0.362068	0.628207	0.0948489	5.71826
1100001G20Rik	-1.2405	-1.23889	-1.23705	-1.2405	-1.23979	-1.23725	0.372507	0.307221	4.02003	0.0764225	0.939083	NA	0.00154957	-1.239
1110001A16Rik	7.05043	7.58873	7.38814	7.3015	7.89234	7.55188	191.898	-0.812608	0.517112	-1.57143	0.116082	0.340785	0.286336	7.46217
1110001J03Rik	7.7453	8.56695	8.03767	8.27443	8.66676	8.36124	334.82	-0.791108	0.456282	-1.73382	0.0829509	0.27924	0.341484	8.27539
1110002B05Rik	11.1961	12.199	11.8165	11.7565	12.3849	12.0653	4017.81	-0.412094	0.197465	-2.08692	0.0368952	0.169395	0.418296	11.903
1110002L01Rik	7.65036	7.95003	7.56335	7.52584	7.69697	7.53209	206.981	0.38429	0.493764	0.778288	0.436399	0.690616	0.160618	7.65311
1110002N22Rik	8.985	8.76227	9.05183	9.51881	9.83146	9.55017	673.421	-1.19133	0.360947	-3.30057	0.000964897	0.0129069	0.410169	9.28326
1110003E01Rik	12.2638	12.5124	12.386	12.4407	12.6215	12.8173	5884.23	-0.289091	0.178609	-1.61857	0.10554	0.321372	0.193716	12.507
1110004E09Rik	8.40793	9.14806	8.78276	8.27515	9.13909	9.16083	490.871	-0.121255	0.386758	-0.313517	0.753888	0.88859	0.39841	8.81897
1110004F10Rik	12.025	12.2823	12.3056	12.5051	12.81	12.8786	5841.01	-0.635427	0.159776	-3.97699	6.98e-05	0.00159169	0.329863	12.4678
1110005A03Rik	8.43632	8.74155	8.31876	8.68573	9.27879	8.41104	433.659	-0.563654	0.38108	-1.4791	0.139115	0.377771	0.351396	8.64536
1110006O24Rik	5.60082	5.75385	5.57018	5.65522	5.9352	5.71101	55.0581	-1.08454	0.896616	-1.2096	0.226434	0.494079	0.131847	5.70438
1110007C09Rik	11.2717	12.2677	11.1761	11.4056	12.0306	11.2099	3241.63	0.0262715	0.201738	0.130226	0.896388	0.95387	0.468876	11.5603
1110008F13Rik	9.90364	10.5457	10.0376	10.197	10.3546	10.5055	1254.51	-0.279711	0.296815	-0.942375	0.346001	0.616272	0.257373	10.2573
1110008J03Rik	7.69017	7.24265	7.4709	7.53786	7.20438	7.63602	183.531	0.0315386	0.545519	0.057814	0.953897	0.980273	0.201317	7.46366
1110008L16Rik	8.14015	7.01602	8.06042	7.96776	8.08845	8.1362	268.398	-1.41046	1.15053	-1.22593	0.220227	0.486177	0.43834	7.9015
1110008P14Rik	8.86565	9.77743	8.99823	9.41269	9.67349	9.20505	681.591	-0.389021	0.361366	-1.07653	0.28169	0.556061	0.36495	9.32209
1110012J17Rik	4.10094	4.07194	4.16893	4.11998	4.19297	4.17154	17.9037	-1.69283	1.82897	-0.925566	0.354672	0.622713	0.0472561	4.13772
1110012L19Rik	9.1899	9.90545	9.46488	9.46377	10.0573	9.64016	823.07	-0.324039	0.274875	-1.17886	0.238454	0.508594	0.318287	9.62023
1110014N23Rik	9.50921	8.67694	9.16316	9.24342	8.98126	9.09774	574.263	-0.0037896	0.373715	-0.0101404	0.991909	0.996984	0.277214	9.11195
1110015O18Rik	4.149	4.79403	4.15119	4.14916	4.15157	4.15074	28.1621	1.91129	3.19344	0.598506	0.549503	0.768298	0.262791	4.25761
1110017D15Rik	4.65166	4.55364	4.65974	4.58204	4.71587	4.7176	25.6733	-1.12109	1.76288	-0.635945	0.524812	0.752287	0.0675938	4.64676
1110017F19Rik	6.43879	6.71862	6.7586	6.77443	6.95214	6.92475	114.04	-1.31966	0.740351	-1.78248	0.0746716	0.261275	0.183929	6.76122
1110018G07Rik	9.06567	7.22298	9.38912	9.16897	8.9833	9.13714	563.42	-1.46383	2.14824	-0.681408	0.495613	0.732894	0.797921	8.82786
1110018J18Rik	9.69842	9.38745	9.37177	9.43786	10.0444	9.70521	804.705	-0.387454	0.382717	-1.01238	0.311359	0.582437	0.261317	9.60751
1110019D14Rik	6.7026	6.65492	6.79402	6.77101	7.19091	6.87514	120.47	-0.914753	0.724645	-1.26235	0.206824	0.470643	0.1918	6.83143
1110020A21Rik	3.19555	3.14456	3.18032	3.20362	3.14389	3.2025	9.10571	-0.114098	2.48606	-0.0458952	0.963394	NA	0.0277506	3.17841
1110020G09Rik	8.48241	9.07048	8.38329	8.58918	8.0159	8.59057	396.199	0.480316	0.608304	0.789599	0.429762	0.684622	0.342633	8.52197
1110021J02Rik	9.52882	8.70848	9.52554	9.24772	9.0665	9.48894	642.887	-0.0444098	0.371951	-0.119397	0.904961	0.958302	0.327706	9.261
1110021L09Rik	8.91411	8.83714	9.06924	8.64798	8.83039	8.9752	476.302	0.240646	0.352439	0.682801	0.494733	0.73282	0.144336	8.87901
1110028C15Rik	9.56197	9.16137	9.673	9.54598	9.46892	9.67755	742.575	-0.16648	0.30773	-0.540995	0.588511	0.792927	0.190644	9.5148
1110028F11Rik	0	0	0	0	0	0	0	NA	NA	NA	NA	NA	0	0
1110028F18Rik	0	0	0	0	0	0	0	NA	NA	NA	NA	NA	0	0
1110031I02Rik	9.7797	10.0431	10.0503	9.54877	10.1853	9.93864	991.875	0.108694	0.277543	0.391628	0.695333	0.857459	0.228151	9.92431
1110032A03Rik	8.64296	8.41762	8.93257	9.06996	9.40164	9.22214	528.254	-1.05879	0.417805	-2.53416	0.0112716	0.0765754	0.36617	8.94781
1110032A04Rik	0	0	0	0	0	0	0	NA	NA	NA	NA	NA	0	0
1110032F04Rik	5.97867	6.29074	6.24912	6.0263	6.14437	6.33996	75.725	-0.090951	0.810801	-0.112174	0.910685	0.961446	0.146712	6.17153
1110034A24Rik	8.2431	8.02035	8.18758	7.89571	7.99194	8.18886	276.025	0.318581	0.466832	0.682433	0.494965	0.73282	0.137785	8.08792
1110034B05Rik	8.84193	9.19944	9.00101	8.90793	9.30534	9.17978	548.206	-0.211204	0.319016	-0.662048	0.50794	0.741275	0.182864	9.07257
1110034G24Rik	4.88417	4.7893	4.95299	4.87043	4.92113	4.98094	30.4581	-1.32582	1.57267	-0.843039	0.399207	0.66035	0.0680942	4.89983
1110035M17Rik	2.48757	2.41913	2.41868	2.44138	2.43906	2.43065	5.47736	-2.30656	3.1855	-0.724081	0.469016	NA	0.0254593	2.43941
1110036E04Rik	-1.23013	-1.22844	-1.22338	-1.23013	-1.2294	-1.22979	0.39854	1.59201	4.04776	0.393307	0.694093	NA	0.00260858	-1.22854
1110037F02Rik	11.7125	11.2117	11.4644	11.6448	11.5075	11.4966	2934.63	-0.10984	0.205552	-0.534367	0.593088	0.795533	0.173399	11.5062
1110038B12Rik	7.95551	9.21158	7.92023	8.70544	8.75711	7.68334	411.116	-0.00858416	0.574219	-0.0149493	0.988073	0.995697	0.602693	8.3722
1110038D17Rik	8.95062	8.81196	8.64741	9.10754	9.05586	8.91238	489.66	-0.425844	0.338098	-1.25953	0.207839	0.471767	0.167577	8.91429
1110038F14Rik	9.16941	9.93026	8.8391	9.16469	9.7168	9.14882	697.43	-0.070897	0.337602	-0.210002	0.833666	0.927262	0.409105	9.32818
1110046J04Rik	5.26606	5.1194	5.28824	5.29793	5.23704	5.22288	38.2222	-0.681302	1.20403	-0.56585	0.571496	0.781954	0.0651098	5.23859
1110049F12Rik	11.2815	11.536	11.2825	11.5695	11.7789	11.6087	2949.56	-0.362716	0.182474	-1.98777	0.0468372	0.195525	0.195049	11.5095
1110050K14Rik	-0.421241	-0.41989	-0.421209	-0.421239	-0.421204	-0.406687	0.692945	-1.17386	4.01144	-0.292629	0.769806	NA	0.00584993	-0.418578
1110051M20Rik	8.97871	9.41426	9.25761	9.13317	9.79117	9.6639	694.44	-0.518083	0.300894	-1.72181	0.0851037	0.283359	0.312246	9.37314
1110054M08Rik	4.40606	4.45545	4.43476	4.47303	4.52529	4.48474	22.3409	-1.26606	1.28385	-0.986145	0.324062	0.595507	0.0413511	4.46322
1110054O05Rik	9.76955	9.00815	9.7199	9.64555	9.54279	9.35088	751.694	-0.0323603	0.39756	-0.0813972	0.935126	0.973427	0.285641	9.50614
1110057K04Rik	10.2557	10.2938	10.4688	10.2385	10.8008	10.5816	1414.92	-0.277358	0.267743	-1.03591	0.300243	0.57213	0.22228	10.4399
1110058L19Rik	8.13491	8.72079	8.70763	8.67976	9.06339	9.16418	460.485	-0.903676	0.361551	-2.49944	0.0124388	0.0816451	0.362089	8.74511
1110059E24Rik	10.0745	10.8132	10.278	10.233	10.8795	10.7213	1509.68	-0.310203	0.244256	-1.26999	0.204087	0.466878	0.344311	10.4999
1110059G10Rik	9.35572	10.0143	9.34902	9.72238	10.2625	9.72735	902.976	-0.520491	0.267422	-1.94633	0.0516151	0.206799	0.360357	9.73856
1110059M19Rik	0	0	0	0	0	0	0	NA	NA	NA	NA	NA	0	0
1110065P20Rik	8.18773	8.38412	8.19447	8.63272	8.3588	8.728	352.894	-0.704037	0.45575	-1.54479	0.122398	0.351362	0.2235	8.41431
1110067D22Rik	11.469	11.1192	11.7089	11.9233	11.9289	11.8588	3347.81	-0.591378	0.235715	-2.50887	0.0121118	0.080421	0.320031	11.668
1190002F15Rik	7.53843	7.69078	8.24934	8.16671	8.59309	8.59505	320.747	-1.55542	0.493464	-3.15205	0.00162129	0.0185786	0.44468	8.1389
1190002H23Rik	13.2745	14.2328	13.9253	13.3022	13.8273	14.1024	14641.1	0.0770261	0.194481	0.396059	0.692061	0.855727	0.403991	13.7774
1190002N15Rik	13.4399	12.378	13.5272	13.1361	12.9928	13.3592	9420.33	-0.0558682	0.250612	-0.222927	0.823592	0.921949	0.421948	13.1389
1190003J15Rik	5.67937	5.88365	5.65599	5.86831	5.89315	5.97613	59.3481	-1.71456	1.0076	-1.70162	0.0888261	0.291098	0.128501	5.8261
1190003K10Rik	0	0	0	0	0	0	0	NA	NA	NA	NA	NA	0	0
1190005F20Rik	9.7887	9.83903	9.44767	9.20473	9.41482	9.42627	755.218	0.57014	0.335542	1.69916	0.089289	0.292042	0.244316	9.52021
1190005I06Rik	5.67468	5.52914	5.72129	5.66567	5.888	5.93974	56.7449	-2.03497	1.38975	-1.46427	0.14312	0.383859	0.152532	5.73642
1190007F08Rik	7.2448	7.1753	7.37287	7.41946	7.55245	7.54301	171.323	-0.816251	0.554531	-1.47197	0.14103	0.380469	0.153606	7.38465
1190007I07Rik	5.29031	5.40095	5.42093	5.48537	5.58308	5.39485	44.6681	-1.46154	1.13838	-1.28387	0.199188	0.460963	0.0981555	5.42925
1200009I06Rik	6.36909	6.58206	6.39549	6.71613	6.82259	6.81659	104.752	-1.79283	0.715517	-2.50564	0.012223	0.0808459	0.201831	6.61699
1200011I18Rik	10.8059	9.46673	10.4847	10.7134	10.0941	10.5018	1403.06	-0.272884	0.308704	-0.883966	0.376714	0.641592	0.495285	10.3444
1200011M11Rik	9.99457	10.4186	10.3596	10.0948	9.76448	9.85476	1113.67	0.521497	0.326147	1.59896	0.109829	0.329414	0.264816	10.0811
1200014J11Rik	9.78334	9.86094	9.72042	9.56886	9.7713	9.65092	850.909	0.198825	0.272512	0.729599	0.465635	0.711335	0.103836	9.72596
1200016B10Rik	10.9261	10.2362	10.7496	10.4641	10.7356	10.4943	1586.09	0.102752	0.326654	0.31456	0.753096	0.887997	0.248629	10.601
1300001I01Rik	11.4714	9.63871	10.888	10.5178	9.60336	10.4676	1645.12	0.630207	0.306331	2.05728	0.0396597	0.176663	0.722875	10.4311
1300002E11Rik	7.22926	6.89161	7.48753	7.12126	7.6312	7.43218	169.907	-0.68579	0.811306	-0.845291	0.397949	0.65938	0.270578	7.29884
1300002K09Rik	3.63129	3.61836	3.80731	3.61645	3.69678	3.64287	13.5251	2.39255	2.58258	0.92642	0.354228	0.622331	0.0739352	3.66885
1300010F03Rik	10.8496	10.3071	10.8184	10.5501	10.2464	10.483	1524.84	0.321001	0.233152	1.37679	0.168578	0.421169	0.251836	10.5424
1300014I06Rik	11.7485	12.4087	10.9084	12.1461	12.8646	11.0968	4368.62	-0.425608	0.179828	-2.36676	0.0179448	0.105723	0.760592	11.8622
1300015D01Rik	2.84052	2.81415	2.84552	2.86423	2.8441	2.83749	7.16716	-1.42558	2.40237	-0.593407	0.552909	NA	0.0161429	2.841
1300017J02Rik	0.759839	0.755731	0.746222	0.746142	0.746237	0.762199	1.69367	2.85503	3.89881	0.732282	0.463996	NA	0.00744489	0.752728
1300018I17Rik	8.49652	8.76604	8.43482	8.68428	8.13777	8.20301	365.346	0.507084	0.496133	1.02207	0.306746	0.578054	0.251226	8.45374
1300018J18Rik	8.60494	8.58177	8.48714	8.3215	8.42103	8.60858	366.335	0.239917	0.415584	0.577301	0.563736	0.777761	0.116316	8.50416
1500001M20Rik	7.49856	7.64573	7.42695	7.61894	8.05936	7.76896	214.013	-0.833312	0.501081	-1.66303	0.0963064	0.305236	0.224968	7.66975
1500002O10Rik	1.03603	1.03631	1.06791	1.03603	1.03615	1.05211	2.08784	0.602542	3.96471	0.151976	0.879206	NA	0.0133048	1.04409
1500002O20Rik	9.35366	9.10664	9.15957	9.27985	9.13851	9.13614	589.087	0.0379325	0.311082	0.121937	0.902949	0.957416	0.098067	9.19573
1500003O03Rik	12.6737	12.7499	12.4617	12.6268	12.7897	12.0191	6139.2	0.181313	0.198125	0.915143	0.360116	0.62667	0.285725	12.5535
1500004A13Rik	6.20042	5.66429	5.92657	6.04624	5.69575	5.8776	65.7165	-0.311186	1.10292	-0.282148	0.77783	0.900004	0.20499	5.90181
1500009C09Rik	0	0	0	0	0	0	0	NA	NA	NA	NA	NA	0	0
1500009L16Rik	3.32251	3.25524	3.3634	3.25787	3.2545	3.29807	10.0586	2.20659	2.48116	0.889341	0.37382	NA	0.0446952	3.29193
1500010J02Rik	9.00017	7.48884	9.11471	8.24504	8.18143	8.80651	430.985	0.0228964	0.678009	0.03377	0.973061	0.989593	0.61749	8.47278
1500011B03Rik	8.26885	9.09816	8.56445	8.53351	8.87055	8.60841	426.559	-0.0970458	0.409283	-0.237112	0.81257	0.917629	0.288812	8.65732
1500011H22Rik	9.14411	9.34727	9.36169	8.97169	9.36122	9.29582	615.09	0.136628	0.310903	0.439453	0.660333	0.839365	0.158126	9.24697
1500011K16Rik	7.87834	8.86976	8.05404	8.60502	9.03851	8.41185	402.463	-0.942379	0.449106	-2.09834	0.0358749	0.166436	0.453317	8.47626
1500012F01Rik	8.645	9.55727	8.60951	9.44246	9.57011	8.37386	603.396	-0.306286	0.458613	-0.667853	0.504228	0.738957	0.546872	9.03304
1500012K07Rik	1.96436	1.93945	1.94832	1.96185	1.93916	1.97066	3.87427	-0.272824	3.48629	-0.0782563	0.937624	NA	0.0134952	1.95397
1500015A07Rik	6.70098	6.46626	7.13226	7.07776	7.23099	7.06659	136.425	-2.29562	1.2155	-1.88863	0.0589418	0.225235	0.295972	6.94581
1500015L24Rik	1.64412	1.64455	1.66257	1.67081	1.64431	1.67197	3.16474	-1.46379	3.8635	-0.378877	0.704779	NA	0.0136042	1.65639
1500015O10Rik	14.2901	14.9277	14.5774	14.8889	15.1335	14.8524	28733.8	-0.416159	0.167546	-2.48385	0.012997	0.0841836	0.29829	14.7783
1500016L03Rik	0	0	0	0	0	0	0	NA	NA	NA	NA	NA	0	0
1500017E21Rik	0.902529	0.897637	0.920199	0.912703	0.897497	0.897461	1.87632	1.40928	3.88498	0.362751	0.716791	NA	0.00962428	0.904671
1500031L02Rik	7.99371	7.76505	7.8901	7.82171	7.95678	8.10571	245.624	-0.209791	0.503031	-0.417054	0.676639	0.847247	0.123133	7.92218
1500032L24Rik	10.2438	11.481	10.7519	10.7881	11.6058	11.2155	2243.27	-0.500212	0.228085	-2.1931	0.0283003	0.14298	0.514153	11.0143
1520402A15Rik	4.42884	4.22038	4.31315	4.23755	4.3415	4.2185	20.6056	3.18405	2.41229	1.31993	0.186858	0.445319	0.0837929	4.29332
1600002D24Rik	1.19236	1.14946	1.14928	1.14918	1.1493	1.15722	2.25284	1.0273	3.89276	0.263899	0.791858	NA	0.0172239	1.1578
1600002H07Rik	6.43731	6.05668	6.60099	6.33041	6.24115	6.49353	87.6665	-0.626705	1.054	-0.594596	0.552113	0.769523	0.194363	6.36001
1600002K03Rik	7.69664	7.91187	7.7071	8.08556	8.30803	7.81176	254.461	-0.763969	0.467398	-1.63452	0.10215	0.316024	0.238736	7.92016
1600010M07Rik	2.98504	2.98264	2.99592	3.00676	3.09774	3.01002	8.35836	-3.22791	2.33095	-1.38481	0.166112	NA	0.0429495	3.01302
1600012F09Rik	11.1977	11.282	10.9774	11.2328	11.4608	11.2568	2428.12	-0.212666	0.2014	-1.05594	0.290995	0.563661	0.155838	11.2346
1600012H06Rik	11.8327	12.4669	11.7634	12.0852	12.0925	11.8152	4212.82	0.0262562	0.223625	0.117412	0.906534	0.959245	0.265124	12.0093
1600014C10Rik	8.60997	7.19749	8.80491	9.02635	9.05	9.01514	478.598	-2.13445	2.09594	-1.01837	0.308501	0.579849	0.716092	8.61731
1600014C23Rik	1.75154	1.752	1.75171	1.75544	1.8066	1.77171	3.47352	-4.4209	3.92725	-1.1257	0.260293	NA	0.0218779	1.76483
1600014K23Rik	0	0	0	0	0	0	0	NA	NA	NA	NA	NA	0	0
1600015I10Rik	0	0	0	0	0	0	0	NA	NA	NA	NA	NA	0	0
1600016N20Rik	3.67402	3.67616	3.75765	3.67408	3.90082	3.6968	14.4672	-0.989648	2.87224	-0.344556	0.730428	0.877446	0.0896753	3.72992
1600019K03Rik	3.60577	3.55477	3.55844	3.63369	3.64271	3.60525	12.2684	-3.27601	2.23809	-1.46375	0.143262	NA	0.0368585	3.60011
1600020E01Rik	9.00178	9.73234	9.18069	9.21705	9.86758	9.33325	709.968	-0.297377	0.288324	-1.0314	0.302353	0.573944	0.338503	9.38878
1600021P15Rik	9.80381	9.61761	10.4609	9.54569	9.84569	10.1584	1008.38	0.166781	0.303982	0.548655	0.583242	0.789751	0.346042	9.90535
1600025M17Rik	0	0	0	0	0	0	0	NA	NA	NA	NA	NA	0	0
1600027N09Rik	6.23215	6.26199	6.27631	6.38366	6.3462	6.28944	79.2031	-0.48713	0.757636	-0.64296	0.52025	0.749573	0.0562799	6.29829
1600029D21Rik	12.9062	12.8498	12.4103	12.7044	12.9293	11.9157	6542.81	0.248846	0.2042	1.21864	0.22298	0.489886	0.394345	12.6193
1600029I14Rik	2.86682	2.86784	2.8903	2.88242	2.94164	2.92608	7.58536	-4.29569	2.83633	-1.51453	0.129892	NA	0.0311431	2.89585
1600029O15Rik	10.1206	11.5463	10.3135	10.9903	11.5543	10.3841	2061.45	-0.422074	0.302931	-1.3933	0.163529	0.414484	0.6374	10.8182
1700001C02Rik	-1.25165	-1.25011	-1.2511	-1.25165	-1.25095	-1.24589	0.346473	-0.991849	4.04905	-0.244959	0.806489	NA	0.00219631	-1.25022
1700001C19Rik	-1.25165	-1.25011	-1.2511	-1.25165	-1.25095	-1.24589	0.346473	-0.991849	4.04905	-0.244959	0.806489	NA	0.00219631	-1.25022
1700001D01Rik	-1.2405	-1.23889	-1.23705	-1.2405	-1.23979	-1.23725	0.372507	0.307221	4.02003	0.0764225	0.939083	NA	0.00154957	-1.239
1700001F09Rik	0	0	0	0	0	0	0	NA	NA	NA	NA	NA	0	0
1700001G11Rik	4.7083	5.1519	4.68024	4.6881	4.87994	4.72931	33.224	0.127855	1.61944	0.0789501	0.937072	0.97419	0.184529	4.8063
1700001G17Rik	3.01948	3.02078	3.03001	3.02795	3.19008	3.03728	8.97054	-4.27014	2.74912	-1.55327	0.120358	NA	0.0668511	3.05426
1700001J03Rik	-0.452354	-0.450992	-0.452324	-0.441986	-0.452318	-0.448714	0.66824	-2.30511	3.97299	-0.580195	0.561783	NA	0.00407169	-0.449781
1700001J11Rik	2.50501	2.49886	2.55672	2.50395	2.50873	2.54943	5.82744	-0.63123	2.56067	-0.246509	0.805288	NA	0.0255722	2.52045
1700001K19Rik	0.449993	0.436558	0.450142	0.436381	0.436457	0.440437	1.35762	2.76752	3.94966	0.700698	0.483492	NA	0.00669104	0.441661
1700001K23Rik	0	0	0	0	0	0	0	NA	NA	NA	NA	NA	0	0
1700001L05Rik	7.17982	7.78015	7.07054	7.18266	7.14151	7.21161	167.335	0.403099	0.695765	0.579361	0.562346	0.776621	0.258933	7.26105
1700001L19Rik	3.25019	3.24627	3.2822	3.27592	3.31543	3.3269	9.88053	-2.93877	2.20085	-1.33529	0.181781	NA	0.0330313	3.28282
1700001O22Rik	4.2939	4.37144	4.38602	4.30999	4.46314	4.42255	21.4465	-1.98092	1.6916	-1.17104	0.241584	0.51242	0.0647565	4.37451
1700001P01Rik	0.285866	0.262721	0.262529	0.262474	0.262539	0.266478	1.19974	1.13471	3.94551	0.287594	0.773658	NA	0.00932539	0.267101
1700003C15Rik	0	0	0	0	0	0	0	NA	NA	NA	NA	NA	0	0
1700003D09Rik	2.45327	2.44195	2.4997	2.46241	2.44154	2.47711	5.5704	0.229914	3.01537	0.0762473	0.939222	NA	0.0225569	2.46266
1700003E16Rik	4.37745	4.18284	4.22298	4.21358	4.23266	4.29307	19.752	-1.15188	1.87607	-0.613985	0.539225	0.761365	0.0705442	4.25376
1700003F12Rik	-0.797952	-0.799361	-0.800731	-0.800749	-0.800551	-0.794198	0.493117	0.637908	3.9747	0.160492	0.872493	NA	0.00255786	-0.798924
1700003F17Rik	0	0	0	0	0	0	0	NA	NA	NA	NA	NA	0	0
1700003G13Rik	-1.95198	-1.9509	-1.95139	-1.95198	-1.95132	-1.95013	0.173236	-0.582649	4.07006	-0.143155	0.886168	NA	0.000701779	-1.95128
1700003G18Rik	-1.95219	-1.95095	-1.94996	-1.95219	-1.95143	-1.95163	0.19927	1.18861	4.06753	0.292218	0.77012	NA	0.000847694	-1.95139
1700003H04Rik	0	0	0	0	0	0	0	NA	NA	NA	NA	NA	0	0
1700003L19Rik	0	0	0	0	0	0	0	NA	NA	NA	NA	NA	0	0
1700003M02Rik	-0.458191	-0.459919	-0.461264	-0.461292	-0.461259	-0.450437	0.666353	0.582123	3.95442	0.147208	0.882968	NA	0.00423915	-0.458727
1700003M07Rik	6.0822	5.73133	5.9262	5.97488	5.99051	6.01834	63.8944	-1.20523	1.17571	-1.02511	0.305313	0.577136	0.120582	5.95391
1700003P14Rik	0	0	0	0	0	0	0	NA	NA	NA	NA	NA	0	0
1700006A11Rik	0	0	0	0	0	0	0	NA	NA	NA	NA	NA	0	0
1700006E09Rik	0	0	0	0	0	0	0	NA	NA	NA	NA	NA	0	0
1700006F04Rik	0	0	0	0	0	0	0	NA	NA	NA	NA	NA	0	0
1700006H21Rik	-1.25165	-1.25011	-1.2511	-1.25165	-1.25095	-1.24589	0.346473	-0.991849	4.04905	-0.244959	0.806489	NA	0.00219631	-1.25022
1700007B14Rik	1.89103	1.89153	1.89122	1.93795	1.89125	1.93043	3.79488	-5.02548	3.92083	-1.28174	0.199934	NA	0.0222979	1.90557
1700007F19Rik	0	0	0	0	0	0	0	NA	NA	NA	NA	NA	0	0
1700007G11Rik	2.50845	2.482	2.51335	2.52474	2.48158	2.50929	5.67821	0.0719673	2.98238	0.0241308	0.980748	NA	0.0175983	2.50323
1700007I08Rik	2.56052	2.56133	2.56083	2.62941	2.60606	2.58473	6.09022	-5.92895	3.58778	-1.65254	0.0984248	NA	0.028812	2.58381
1700007J10Rik	7.15361	7.34515	6.99738	7.09971	7.08344	7.09168	142.712	0.230356	0.621815	0.370458	0.711041	0.865268	0.117453	7.1285
1700007K09Rik	0	0	0	0	0	0	0	NA	NA	NA	NA	NA	0	0
1700007K13Rik	1.00259	1.00287	1.0119	1.00454	1.00271	1.03813	2.04017	-1.31258	3.95624	-0.331776	0.740059	NA	0.0140172	1.01046
1700007L15Rik	5.79823	6.08481	5.78968	5.87719	6.09108	5.93799	64.1445	-0.824174	0.86925	-0.948144	0.343056	0.613361	0.134029	5.92983
1700007P06Rik	2.60898	2.59095	2.6312	2.63188	2.59049	2.62989	6.14735	-0.152151	2.89644	-0.0525303	0.958106	NA	0.019885	2.6139
1700008A04Rik	0	0	0	0	0	0	0	NA	NA	NA	NA	NA	0	0
1700008F21Rik	-2.01158	-2.01162	-2.01183	-2.01208	-2.0118	-2.01187	0.073322	1.16606	4.06331	0.286973	0.774133	NA	0.000182565	-2.0118
1700008I05Rik	-1.95198	-1.9509	-1.95139	-1.95198	-1.95132	-1.95013	0.173236	-0.582649	4.07006	-0.143155	0.886168	NA	0.000701779	-1.95128
1700008J07Rik	6.90277	6.71901	7.00986	7.10641	7.12178	7.06019	130.488	-0.966101	0.686869	-1.40653	0.159567	0.408225	0.153111	6.98667
1700008K24Rik	0	0	0	0	0	0	0	NA	NA	NA	NA	NA	0	0
1700008O03Rik	2.04923	2.04979	2.08563	2.09628	2.05461	2.05744	4.22518	-1.85974	3.68132	-0.505183	0.61343	NA	0.0202386	2.0655
1700008P02Rik	0	0	0	0	0	0	0	NA	NA	NA	NA	NA	0	0
1700008P20Rik	0	0	0	0	0	0	0	NA	NA	NA	NA	NA	0	0
1700009C05Rik	0	0	0	0	0	0	0	NA	NA	NA	NA	NA	0	0
1700009J07Rik	0	0	0	0	0	0	0	NA	NA	NA	NA	NA	0	0
1700009N14Rik	-1.95198	-1.9509	-1.95139	-1.95198	-1.95132	-1.95013	0.173236	-0.582649	4.07006	-0.143155	0.886168	NA	0.000701779	-1.95128
1700009P17Rik	4.34324	4.53757	4.41562	4.37386	4.39954	4.44729	22.2888	-0.363686	1.46255	-0.248666	0.803619	0.912305	0.0678619	4.41952
1700010B08Rik	0	0	0	0	0	0	0	NA	NA	NA	NA	NA	0	0
1700010D01Rik	0	0	0	0	0	0	0	NA	NA	NA	NA	NA	0	0
1700010I02Rik	1.66223	1.64396	1.65287	1.66828	1.64372	1.66352	3.14377	-0.26044	3.75321	-0.0693913	0.944678	NA	0.0104998	1.65576
1700010I14Rik	5.35242	5.26789	5.25449	5.17189	5.28287	5.19531	38.8311	0.929544	1.09047	0.852428	0.393977	0.656024	0.0646508	5.25414
1700010J16Rik	0	0	0	0	0	0	0	NA	NA	NA	NA	NA	0	0
1700010K23Rik	0	0	0	0	0	0	0	NA	NA	NA	NA	NA	0	0
1700010M22Rik	0	0	0	0	0	0	0	NA	NA	NA	NA	NA	0	0
1700011A15Rik	-0.735394	-0.73388	-0.73535	-0.735392	-0.735133	-0.724819	0.519709	-1.12718	4.02784	-0.279847	0.779595	NA	0.00420923	-0.733328
1700011B04Rik	0	0	0	0	0	0	0	NA	NA	NA	NA	NA	0	0
1700011E24Rik	0.469487	0.462819	0.471881	0.462639	0.462716	0.478615	1.38477	1.58298	3.91867	0.403958	0.686244	NA	0.0065338	0.468026
1700011F03Rik	0	0	0	0	0	0	0	NA	NA	NA	NA	NA	0	0
1700011F14Rik	0	0	0	0	0	0	0	NA	NA	NA	NA	NA	0	0
1700011H14Rik	-1.95198	-1.9509	-1.95139	-1.95198	-1.95132	-1.95013	0.173236	-0.582649	4.07006	-0.143155	0.886168	NA	0.000701779	-1.95128
1700011I03Rik	0	0	0	0	0	0	0	NA	NA	NA	NA	NA	0	0
1700011J10Rik	7.04853	7.64408	7.21679	7.29529	7.82962	7.29908	183.843	-0.602879	0.532944	-1.13123	0.25796	0.530067	0.290397	7.3889
1700011L22Rik	-1.95198	-1.9509	-1.95139	-1.95198	-1.95132	-1.95013	0.173236	-0.582649	4.07006	-0.143155	0.886168	NA	0.000701779	-1.95128
1700011M02Rik	0	0	0	0	0	0	0	NA	NA	NA	NA	NA	0	0
1700012A03Rik	0	0	0	0	0	0	0	NA	NA	NA	NA	NA	0	0
1700012A16Rik	0.334091	0.320732	0.320629	0.335757	0.32064	0.320616	1.24658	0.283765	3.96009	0.0716563	0.942875	NA	0.00738801	0.325411
1700012B07Rik	0	0	0	0	0	0	0	NA	NA	NA	NA	NA	0	0
1700012B09Rik	5.17234	5.30251	5.19553	5.31615	5.34482	5.36484	39.9314	-1.56531	1.07714	-1.45322	0.146163	0.388233	0.0798682	5.2827
1700012B15Rik	9.19424	9.98828	9.21168	9.30458	9.67737	9.39602	739.87	-0.00688852	0.327367	-0.0210422	0.983212	0.993836	0.312041	9.46203
1700012D01Rik	4.32483	4.30649	4.41647	4.36195	4.4722	4.42463	21.478	-2.15732	1.74103	-1.23911	0.215306	0.480771	0.0639949	4.38443
1700012D14Rik	4.51208	4.6266	4.54681	4.49759	4.60661	4.59023	24.1797	0.0606559	1.25267	0.0484214	0.96138	0.984432	0.052576	4.56332
1700012I11Rik	-0.99398	-0.996518	-0.997635	-0.997846	-0.99747	-0.994811	0.393202	0.871419	4.00089	0.217806	0.82758	NA	0.00162185	-0.996377
1700012L04Rik	0	0	0	0	0	0	0	NA	NA	NA	NA	NA	0	0
1700012P22Rik	-1.23013	-1.22844	-1.22338	-1.23013	-1.2294	-1.22979	0.39854	1.59201	4.04776	0.393307	0.694093	NA	0.00260858	-1.22854
1700013D24Rik	0	0	0	0	0	0	0	NA	NA	NA	NA	NA	0	0
1700013F07Rik	0.331854	0.332022	0.331918	0.348995	0.331929	0.34383	1.26222	-3.48745	3.94671	-0.883634	0.376894	NA	0.00765471	0.336758
1700013G23Rik	4.23316	4.23053	4.26625	4.37057	4.4167	4.30803	20.5951	-4.25016	1.79053	-2.37369	0.0176113	0.10443	0.0761459	4.30421
1700013G24Rik	-1.25165	-1.25011	-1.2511	-1.25165	-1.25095	-1.24589	0.346473	-0.991849	4.04905	-0.244959	0.806489	NA	0.00219631	-1.25022
1700013H16Rik	0	0	0	0	0	0	0	NA	NA	NA	NA	NA	0	0
1700013N18Rik	0.990542	0.954101	0.95394	0.95385	0.953957	0.961881	1.95956	1.01882	3.89439	0.261613	0.79362	NA	0.0146342	0.961379
1700014N06Rik	0	0	0	0	0	0	0	NA	NA	NA	NA	NA	0	0
1700015E13Rik	0.621336	0.604556	0.622638	0.604358	0.604443	0.604413	1.5303	3.88628	3.97363	0.978015	0.328067	NA	0.00906928	0.610291
1700015F17Rik	-1.25165	-1.25011	-1.2511	-1.25165	-1.25095	-1.24589	0.346473	-0.991849	4.04905	-0.244959	0.806489	NA	0.00219631	-1.25022
1700015G11Rik	0	0	0	0	0	0	0	NA	NA	NA	NA	NA	0	0
1700016C15Rik	2.29396	2.26905	2.29153	2.27035	2.26868	2.33073	4.95046	0.998639	3.31674	0.30109	0.763346	NA	0.0241474	2.28738
1700016D06Rik	3.68393	3.62794	3.66377	3.66867	3.74354	3.66687	12.9632	-1.2579	2.06311	-0.609712	0.542053	NA	0.0380021	3.67579
1700016G22Rik	3.49152	3.76286	3.49233	3.50303	3.52236	3.49216	13.533	-0.154269	2.90167	-0.0531655	0.9576	0.98239	0.107852	3.54404
1700016H13Rik	1.4516	1.43997	1.46704	1.43962	1.43977	1.46356	2.74829	2.04305	3.89386	0.524685	0.599802	NA	0.0125648	1.45026
1700016K19Rik	1.91757	1.91119	1.9201	1.91651	1.91091	1.97658	3.88435	-0.540848	3.52459	-0.15345	0.878044	NA	0.0252955	1.92548
1700016L04Rik	-1.59582	-1.59501	-1.59548	-1.594	-1.59541	-1.59557	0.165001	-0.935355	4.03964	-0.231544	0.816892	NA	0.000651238	-1.59522
1700016L21Rik	0	0	0	0	0	0	0	NA	NA	NA	NA	NA	0	0
1700016M24Rik	3.83649	3.82449	3.91259	3.9518	3.88412	3.86724	14.9995	-2.62423	1.9914	-1.31778	0.187577	0.44618	0.0476838	3.87946
1700016P04Rik	0	0	0	0	0	0	0	NA	NA	NA	NA	NA	0	0
1700017B05Rik	9.89227	10.2249	10.0407	9.27835	9.76452	9.40823	920.665	0.886755	0.267853	3.3106	0.000930965	0.012563	0.365451	9.76816
1700017D01Rik	0	0	0	0	0	0	0	NA	NA	NA	NA	NA	0	0
1700017G19Rik	3.40277	3.4047	3.4035	3.40957	3.65947	3.42641	12.4373	-5.43913	2.75332	-1.97548	0.0482139	NA	0.102476	3.45107
1700017J07Rik	0	0	0	0	0	0	0	NA	NA	NA	NA	NA	0	0
1700017N19Rik	0	0	0	0	0	0	0	NA	NA	NA	NA	NA	0	0
1700018A04Rik	0.856278	0.856523	0.892556	0.858225	0.856387	0.860383	1.8499	0.39928	3.95254	0.101019	0.919536	NA	0.0143745	0.863392
1700018B08Rik	0	0	0	0	0	0	0	NA	NA	NA	NA	NA	0	0
1700018B24Rik	0	0	0	0	0	0	0	NA	NA	NA	NA	NA	0	0
1700018C11Rik	0	0	0	0	0	0	0	NA	NA	NA	NA	NA	0	0
1700018F24Rik	-1.95198	-1.9509	-1.95139	-1.95198	-1.95132	-1.95013	0.173236	-0.582649	4.07006	-0.143155	0.886168	NA	0.000701779	-1.95128
1700018G05Rik	0	0	0	0	0	0	0	NA	NA	NA	NA	NA	0	0
1700018L02Rik	1.45965	1.42639	1.44888	1.42797	1.42619	1.43015	2.71853	2.5503	3.89136	0.655374	0.512227	NA	0.0142193	1.43654
1700018L24Rik	1.81213	1.80914	1.80884	1.80867	1.88745	1.8088	3.69914	-0.0542775	3.91099	-0.0138782	0.988927	NA	0.0318434	1.82251
1700019A02Rik	0	0	0	0	0	0	0	NA	NA	NA	NA	NA	0	0
1700019B03Rik	1.32931	1.32965	1.37007	1.33126	1.32946	1.34543	2.56888	-0.215925	3.96102	-0.0545123	0.956527	NA	0.0163634	1.3392
1700019B21Rik	-0.470172	-0.468812	-0.470143	-0.456467	-0.470138	-0.470149	0.660005	-1.10255	3.97688	-0.277239	0.781596	NA	0.00550304	-0.467647
1700019D03Rik	3.80805	3.90221	3.80776	3.85615	3.84559	3.8167	14.5921	-0.369238	1.57502	-0.234434	0.814648	0.918818	0.0367799	3.83941
1700019E08Rik	0	0	0	0	0	0	0	NA	NA	NA	NA	NA	0	0
1700019E19Rik	9.36393	9.69977	9.76037	9.79611	10.3898	10.033	963.628	-0.708935	0.283182	-2.50346	0.0122987	0.0809182	0.344698	9.84049
1700019G17Rik	4.24011	4.1197	4.22891	4.18425	4.17448	4.17789	18.4093	-0.382341	1.81836	-0.210266	0.83346	0.92717	0.0432468	4.18756
1700019G24Rik	3.22721	3.19425	3.25646	3.22575	3.22421	3.24857	9.41623	-1.00488	2.18069	-0.46081	0.644935	NA	0.0218185	3.22941
1700019L03Rik	5.42152	5.1422	5.43886	5.20048	5.23707	5.27291	41.1325	0.358642	1.5516	0.231144	0.817203	0.9192	0.120241	5.28551
1700019M22Rik	0	0	0	0	0	0	0	NA	NA	NA	NA	NA	0	0
1700019N12Rik	-1.95219	-1.95095	-1.94996	-1.95219	-1.95143	-1.95163	0.19927	1.18861	4.06753	0.292218	0.77012	NA	0.000847694	-1.95139
1700019N19Rik	-0.068975	-0.0680189	-0.0689315	-0.0526818	-0.0689238	-0.065139	0.915742	-2.39066	3.95375	-0.604656	0.545408	NA	0.00642397	-0.065445
1700019O17Rik	0	0	0	0	0	0	0	NA	NA	NA	NA	NA	0	0
1700020A23Rik	-0.209024	-0.225157	-0.226273	-0.226307	-0.226266	-0.22628	0.806542	2.14265	3.9884	0.537222	0.591114	NA	0.00696793	-0.223218
1700020D05Rik	0	0	0	0	0	0	0	NA	NA	NA	NA	NA	0	0
1700020G17Rik	-1.29816	-1.29701	-1.29772	-1.29439	-1.29762	-1.29786	0.247502	-1.00079	4.01386	-0.249334	0.803102	NA	0.00139244	-1.29712
1700020I14Rik	10.6035	10.0374	10.5474	10.3669	10.509	10.6177	1418.26	-0.143731	0.29299	-0.490567	0.623733	0.816488	0.219908	10.447
1700020L24Rik	0.474411	0.474597	0.474481	0.493451	0.479592	0.482447	1.39351	-3.83109	3.93595	-0.973361	0.330374	NA	0.00745383	0.47983
1700020M21Rik	0	0	0	0	0	0	0	NA	NA	NA	NA	NA	0	0
1700020N01Rik	4.78959	4.72074	4.90369	4.80197	4.9261	4.81373	29.2052	-1.11116	1.68982	-0.657564	0.510818	0.742825	0.0764067	4.82597
1700020N15Rik	0	0	0	0	0	0	0	NA	NA	NA	NA	NA	0	0
1700020N18Rik	0	0	0	0	0	0	0	NA	NA	NA	NA	NA	0	0
1700020O03Rik	10.0811	9.3491	10.1471	10.2978	9.55898	10.2655	1046.66	-0.277453	0.251676	-1.10242	0.27028	0.544082	0.397618	9.94993
1700021C14Rik	6.11043	6.56952	6.12388	6.20025	6.49063	6.22962	84.7214	-0.457051	0.763904	-0.598309	0.549634	0.768325	0.194878	6.28739
1700021F05Rik	8.0351	8.26899	7.87332	8.00881	8.40346	8.21774	289.554	-0.369033	0.457672	-0.806326	0.420055	0.677239	0.195577	8.13457
1700021F07Rik	0	0	0	0	0	0	0	NA	NA	NA	NA	NA	0	0
1700021K19Rik	11.5683	10.7634	10.9175	11.4738	10.5812	10.8108	2191.65	0.16769	0.19859	0.844405	0.398443	0.659722	0.404799	11.0191
1700021N21Rik	2.08137	2.16409	2.10035	2.08139	2.08164	2.08155	4.52441	4.25568	3.94348	1.07917	0.280513	NA	0.0330556	2.0984
1700022A21Rik	0	0	0	0	0	0	0	NA	NA	NA	NA	NA	0	0
1700022A22Rik	0	0	0	0	0	0	0	NA	NA	NA	NA	NA	0	0
1700022E09Rik	0	0	0	0	0	0	0	NA	NA	NA	NA	NA	0	0
1700022H16Rik	0	0	0	0	0	0	0	NA	NA	NA	NA	NA	0	0
1700022I11Rik	0	0	0	0	0	0	0	NA	NA	NA	NA	NA	0	0
1700022P22Rik	0.571465	0.563105	0.576707	0.562912	0.562995	0.574945	1.48413	1.99373	3.92136	0.508427	0.611154	NA	0.00645143	0.568688
1700023A16Rik	-0.421241	-0.41989	-0.421209	-0.421239	-0.421204	-0.406687	0.692945	-1.17386	4.01144	-0.292629	0.769806	NA	0.00584993	-0.418578
1700023C21Rik	0	0	0	0	0	0	0	NA	NA	NA	NA	NA	0	0
1700023E05Rik	1.40932	1.3994	1.41292	1.4125	1.39921	1.42294	2.65467	-0.145023	3.85874	-0.037583	0.97002	NA	0.00904638	1.40938
1700023F02Rik	0	0	0	0	0	0	0	NA	NA	NA	NA	NA	0	0
1700023F06Rik	4.24831	4.3632	4.24835	4.26823	4.33456	4.25145	20.0059	-0.132847	1.3387	-0.0992354	0.920951	0.966644	0.0503292	4.28568
1700023L04Rik	3.44491	3.41713	3.44845	3.46717	3.44201	3.52996	11.1761	-2.08103	2.0131	-1.03374	0.301256	NA	0.0386008	3.45827
1700024B18Rik	0	0	0	0	0	0	0	NA	NA	NA	NA	NA	0	0
1700024F13Rik	2.61376	2.60766	2.60713	2.62237	2.6999	2.6351	6.38453	-4.19765	3.01383	-1.39279	0.163682	NA	0.035357	2.63099
1700024G13Rik	0	0	0	0	0	0	0	NA	NA	NA	NA	NA	0	0
1700024P03Rik	0.381919	0.382096	0.400278	0.381924	0.381998	0.393983	1.31679	0.457528	3.9719	0.115191	0.908294	NA	0.00807123	0.387033
1700024P04Rik	-1.25165	-1.25011	-1.2511	-1.25165	-1.25095	-1.24589	0.346473	-0.991849	4.04905	-0.244959	0.806489	NA	0.00219631	-1.25022
1700024P16Rik	0.258592	0.258847	0.258652	0.258596	0.258663	0.286209	1.21265	-1.24423	3.98806	-0.311989	0.755049	NA	0.0112431	0.26326
1700025B11Rik	0.602051	0.602257	0.629423	0.602057	0.602143	0.610149	1.54209	0.877479	3.97138	0.220951	0.825131	NA	0.0109688	0.608013
1700025C18Rik	0	0	0	0	0	0	0	NA	NA	NA	NA	NA	0	0
1700025E21Rik	-1.95198	-1.9509	-1.95139	-1.95198	-1.95132	-1.95013	0.173236	-0.582649	4.07006	-0.143155	0.886168	NA	0.000701779	-1.95128
1700025F22Rik	-1.12222	-1.12097	-1.12191	-1.11681	-1.12177	-1.12209	0.330003	-1.03825	3.99982	-0.259575	0.795192	NA	0.0020819	-1.12096
1700025F24Rik	-1.95198	-1.9509	-1.95139	-1.95198	-1.95132	-1.95013	0.173236	-0.582649	4.07006	-0.143155	0.886168	NA	0.000701779	-1.95128
1700025G04Rik	12.4727	12.6578	12.5079	12.7909	12.7116	12.5849	6325.7	-0.180397	0.172326	-1.04683	0.295177	0.567493	0.122075	12.621
1700025K23Rik	6.95271	7.51562	7.08711	7.13681	7.32235	7.24516	155.597	-0.30144	0.618431	-0.487427	0.625956	0.817521	0.196936	7.20996
1700025K24Rik	0	0	0	0	0	0	0	NA	NA	NA	NA	NA	0	0
1700025M24Rik	0	0	0	0	0	0	0	NA	NA	NA	NA	NA	0	0
1700025N23Rik	5.98985	5.75044	5.97217	5.94559	5.86181	5.95642	61.2785	-0.351714	0.919424	-0.382537	0.702063	0.860349	0.090994	5.91271
1700026D08Rik	2.92412	2.91651	2.92972	3.02243	2.91594	2.96301	7.9108	-1.70412	2.68649	-0.634332	0.525864	NA	0.0415803	2.94529
1700026D11Rik	0	0	0	0	0	0	0	NA	NA	NA	NA	NA	0	0
1700026F02Rik	0	0	0	0	0	0	0	NA	NA	NA	NA	NA	0	0
1700026J04Rik	-1.20139	-1.20258	-1.20349	-1.20388	-1.20336	-1.20118	0.31988	0.783006	4.02924	0.194331	0.845917	NA	0.00113943	-1.20265
1700026L06Rik	1.99308	1.99362	2.02059	2.03463	1.99332	2.0171	4.05005	-1.08001	3.85292	-0.28031	0.77924	NA	0.0178435	2.00873
1700027A15Rik	0	0	0	0	0	0	0	NA	NA	NA	NA	NA	0	0
1700027A23Rik	2.9408	2.90775	2.9826	2.93369	2.90717	2.94671	7.74141	0.719247	2.6455	0.271875	0.785718	NA	0.0280817	2.93645
1700027D21Rik	-1.25165	-1.25011	-1.2511	-1.25165	-1.25095	-1.24589	0.346473	-0.991849	4.04905	-0.244959	0.806489	NA	0.00219631	-1.25022
1700027F09Rik	-0.495435	-0.498629	-0.499976	-0.494867	-0.49997	-0.496413	0.640704	-0.563778	3.96563	-0.142166	0.886949	NA	0.00227462	-0.497548
1700027H10Rik	-1.95198	-1.9509	-1.95139	-1.95198	-1.95132	-1.95013	0.173236	-0.582649	4.07006	-0.143155	0.886168	NA	0.000701779	-1.95128
1700027I24Rik	0	0	0	0	0	0	0	NA	NA	NA	NA	NA	0	0
1700027J07Rik	0	0	0	0	0	0	0	NA	NA	NA	NA	NA	0	0
1700028B04Rik	0	0	0	0	0	0	0	NA	NA	NA	NA	NA	0	0
1700028D13Rik	0	0	0	0	0	0	0	NA	NA	NA	NA	NA	0	0
1700028E10Rik	4.82919	4.76246	4.67669	4.69178	4.92624	4.73967	28.7187	-0.803217	1.4951	-0.537232	0.591107	0.794661	0.0935007	4.77101
1700028I16Rik	0.552869	0.553064	0.552943	0.58663	0.552956	0.552928	1.48501	-1.14381	3.9629	-0.288629	0.772865	NA	0.0137492	0.558565
1700028J19Rik	5.88205	5.85783	5.8636	5.97012	6.02567	5.91091	61.174	-0.729623	0.84632	-0.862112	0.388626	0.65177	0.0666797	5.91836
1700028K03Rik	2.86511	2.89695	2.84981	2.85143	2.95259	2.85383	7.64902	-0.333127	2.48793	-0.133897	0.893484	NA	0.0404333	2.87829
1700028M03Rik	0	0	0	0	0	0	0	NA	NA	NA	NA	NA	0	0
1700028P14Rik	-1.25165	-1.25011	-1.2511	-1.25165	-1.25095	-1.24589	0.346473	-0.991849	4.04905	-0.244959	0.806489	NA	0.00219631	-1.25022
1700028P15Rik	0	0	0	0	0	0	0	NA	NA	NA	NA	NA	0	0
1700029B22Rik	0	0	0	0	0	0	0	NA	NA	NA	NA	NA	0	0
1700029F09Rik	9.51709	10.6093	9.74081	9.74626	10.4134	9.84856	1089.7	-0.0807456	0.275865	-0.2927	0.769752	0.896971	0.430643	9.97924
1700029F12Rik	-0.283064	-0.294351	-0.295552	-0.295584	-0.295546	-0.291871	0.759812	1.0733	3.95847	0.271139	0.786284	NA	0.00491558	-0.292661
1700029G01Rik	7.67583	7.65937	7.72536	7.58349	7.5375	7.63797	199.894	0.304803	0.489469	0.622722	0.533468	0.757743	0.0671986	7.63659
1700029H14Rik	2.00995	1.9934	2.0159	2.01017	1.9931	2.02853	4.0312	0.0264742	3.39757	0.00779211	0.993783	NA	0.013608	2.00851
1700029I01Rik	5.08526	5.0265	5.01818	5.1227	5.14078	5.05907	34.0399	-0.820702	1.10075	-0.745582	0.45592	0.705024	0.0500799	5.07542
1700029I15Rik	1.71101	1.68935	1.71634	1.69857	1.68911	1.70501	3.25426	0.969138	3.69269	0.262448	0.792976	NA	0.0112484	1.70157
1700029J03Rik	2.66941	2.66163	2.68407	2.68579	2.66115	2.75264	6.59314	-1.06164	2.827	-0.375536	0.707262	NA	0.0344435	2.68578
1700029J07Rik	7.01466	7.15789	6.94193	6.93015	6.78169	7.01036	128.49	0.557312	0.699559	0.796662	0.425647	0.681188	0.123868	6.97278
1700029J11Rik	2.85573	2.84459	2.93219	2.86684	2.88951	2.84389	7.48694	-0.712458	3.09967	-0.22985	0.818209	NA	0.033948	2.87213
1700029M20Rik	-1.25165	-1.25011	-1.2511	-1.25165	-1.25095	-1.24589	0.346473	-0.991849	4.04905	-0.244959	0.806489	NA	0.00219631	-1.25022
1700029N11Rik	0	0	0	0	0	0	0	NA	NA	NA	NA	NA	0	0
1700029P11Rik	-1.20279	-1.20616	-1.20699	-1.20734	-1.20687	-1.20716	0.293288	1.96573	4.03475	0.487201	0.626116	NA	0.00172629	-1.20622
1700030A11Rik	0	0	0	0	0	0	0	NA	NA	NA	NA	NA	0	0
1700030C10Rik	4.09506	4.20366	4.08602	4.08431	4.12523	4.06846	17.7722	0.731038	1.39934	0.522417	0.60138	0.801508	0.0493704	4.11046
1700030F04Rik	0	0	0	0	0	0	0	NA	NA	NA	NA	NA	0	0
1700030F18Rik	0	0	0	0	0	0	0	NA	NA	NA	NA	NA	0	0
1700030J22Rik	7.45759	6.76982	7.41613	7.57662	7.63389	7.58256	185.041	-1.87697	1.15702	-1.62225	0.10475	0.31995	0.3224	7.4061
1700030K09Rik	6.63874	6.2955	6.71491	6.67433	7.00724	6.84145	112.21	-1.812	1.27489	-1.4213	0.15523	0.40131	0.237711	6.69536
1700030L20Rik	-1.23013	-1.22844	-1.22338	-1.23013	-1.2294	-1.22979	0.39854	1.59201	4.04776	0.393307	0.694093	NA	0.00260858	-1.22854
1700030M09Rik	0	0	0	0	0	0	0	NA	NA	NA	NA	NA	0	0
1700030N03Rik	0	0	0	0	0	0	0	NA	NA	NA	NA	NA	0	0
1700030O20Rik	0	0	0	0	0	0	0	NA	NA	NA	NA	NA	0	0
1700031A10Rik	0	0	0	0	0	0	0	NA	NA	NA	NA	NA	0	0
1700031F05Rik	0	0	0	0	0	0	0	NA	NA	NA	NA	NA	0	0
1700031M16Rik	0	0	0	0	0	0	0	NA	NA	NA	NA	NA	0	0
1700031P21Rik	0	0	0	0	0	0	0	NA	NA	NA	NA	NA	0	0
1700034E13Rik	3.2594	3.23323	3.25094	3.30135	3.24285	3.32802	9.79773	-2.07619	2.09358	-0.991694	0.321347	NA	0.037179	3.2693
1700034F02Rik	4.0421	4.19515	4.04659	4.05821	4.00459	4.06869	17.5996	0.982049	2.01968	0.486239	0.626798	0.818217	0.0654294	4.06922
1700034G24Rik	0	0	0	0	0	0	0	NA	NA	NA	NA	NA	0	0
1700034H14Rik	9.76834	10.047	9.89513	9.88755	10.1478	10.1693	1024.65	-0.247817	0.255486	-0.969983	0.332055	0.602865	0.160517	9.98585
1700034H15Rik	4.84554	4.86101	4.84422	4.86244	4.89604	4.83982	29.085	-0.197811	1.13819	-0.173794	0.862027	0.939133	0.0207428	4.85818
1700034I23Rik	0.596981	0.597187	0.597059	0.596986	0.632377	0.597043	1.55422	-1.49869	4.01028	-0.373712	0.708618	NA	0.0144217	0.602939
1700034J05Rik	3.45228	3.45407	3.45296	3.49987	3.655	3.48323	12.2134	-6.41808	2.74346	-2.33941	0.0193143	NA	0.0786216	3.49957
1700034K08Rik	0	0	0	0	0	0	0	NA	NA	NA	NA	NA	0	0
1700034O15Rik	0	0	0	0	0	0	0	NA	NA	NA	NA	NA	0	0
1700034P13Rik	2.41194	2.40056	2.42312	2.40181	2.47892	2.40815	5.49107	0.391568	2.85088	0.13735	0.890754	NA	0.029638	2.42075
1700036G14Rik	-1.25165	-1.25011	-1.2511	-1.25165	-1.25095	-1.24589	0.346473	-0.991849	4.04905	-0.244959	0.806489	NA	0.00219631	-1.25022
1700037C18Rik	6.02879	6.17461	5.91655	6.06044	5.96299	6.10474	67.403	-0.124725	0.948665	-0.131474	0.895401	0.953434	0.0938222	6.04135
1700037H04Rik	8.43641	8.97285	8.43558	8.81164	8.79496	8.40752	415.172	-0.124418	0.420287	-0.296032	0.767206	0.895496	0.245556	8.64316
1700039E15Rik	-1.95219	-1.95095	-1.94996	-1.95219	-1.95143	-1.95163	0.19927	1.18861	4.06753	0.292218	0.77012	NA	0.000847694	-1.95139
1700039E22Rik	0	0	0	0	0	0	0	NA	NA	NA	NA	NA	0	0
1700040I03Rik	7.68016	7.76678	8.28686	8.04858	8.57642	8.27171	299.532	-0.978827	0.544277	-1.7984	0.0721138	0.255882	0.340929	8.10509
1700040L02Rik	-0.154953	-0.153864	-0.154913	-0.151314	-0.154906	-0.13991	0.857947	-2.62149	3.97739	-0.659098	0.509833	NA	0.00591608	-0.151643
1700040N02Rik	-0.458191	-0.459919	-0.461264	-0.461292	-0.461259	-0.450437	0.666353	0.582123	3.95442	0.147208	0.882968	NA	0.00423915	-0.458727
1700041C23Rik	0	0	0	0	0	0	0	NA	NA	NA	NA	NA	0	0
1700041M19Rik	0	0	0	0	0	0	0	NA	NA	NA	NA	NA	0	0
1700042B14Rik	0	0	0	0	0	0	0	NA	NA	NA	NA	NA	0	0
1700042G07Rik	0	0	0	0	0	0	0	NA	NA	NA	NA	NA	0	0
1700042G15Rik	-1.95198	-1.9509	-1.95139	-1.95198	-1.95132	-1.95013	0.173236	-0.582649	4.07006	-0.143155	0.886168	NA	0.000701779	-1.95128
1700042O10Rik	0.238156	0.238471	0.265346	0.238161	0.238227	0.238204	1.19562	1.92905	3.99989	0.482275	0.629611	NA	0.011065	0.242761
1700044C05Rik	0	0	0	0	0	0	0	NA	NA	NA	NA	NA	0	0
1700044K03Rik	0	0	0	0	0	0	0	NA	NA	NA	NA	NA	0	0
1700045H11Rik	1.895	1.89551	1.90907	1.89501	1.96448	1.89921	3.87948	-0.969469	3.88281	-0.249682	0.802833	NA	0.0273667	1.90971
1700045I19Rik	2.73477	2.73569	2.78912	2.78583	2.73518	2.78615	6.87083	-1.15936	3.59354	-0.322622	0.746981	NA	0.0284083	2.76112
1700046C09Rik	0	0	0	0	0	0	0	NA	NA	NA	NA	NA	0	0
1700047G03Rik	0	0	0	0	0	0	0	NA	NA	NA	NA	NA	0	0
1700047I17Rik2	0	0	0	0	0	0	0	NA	NA	NA	NA	NA	0	0
1700047L14Rik	-1.95219	-1.95095	-1.94996	-1.95219	-1.95143	-1.95163	0.19927	1.18861	4.06753	0.292218	0.77012	NA	0.000847694	-1.95139
1700047M11Rik	6.44243	6.11529	6.72303	6.39658	6.68664	6.38555	95.4631	-0.730178	1.39886	-0.521981	0.601684	0.801508	0.223263	6.45825
1700048M11Rik	0.268413	0.260255	0.260043	0.2788	0.260054	0.260031	1.19162	-0.0707473	3.96058	-0.0178629	0.985748	NA	0.00771181	0.264599
1700048O20Rik	7.44307	6.65254	7.37992	7.23029	7.34036	7.21133	160.103	-0.923657	1.24477	-0.742028	0.45807	0.706307	0.28683	7.20958
1700049E15Rik	4.29623	4.53213	4.33197	4.26305	4.33481	4.28855	21.936	1.98401	1.33633	1.48467	0.137631	0.375509	0.09745	4.34112
1700049E22Rik	0	0	0	0	0	0	0	NA	NA	NA	NA	NA	0	0
1700049G17Rik	7.34018	7.08579	7.10549	6.93207	7.69573	7.15408	162.494	-0.134072	0.790453	-0.169615	0.865313	0.941073	0.268005	7.21889
1700049L16Rik	1.45152	1.45189	1.45166	1.51068	1.45168	1.45563	2.81326	-2.55572	3.9202	-0.651935	0.514443	NA	0.0238119	1.46218
1700051A21Rik	5.71446	6.11808	5.73972	5.81253	5.76004	5.77355	60.4763	0.202469	0.999296	0.202612	0.839439	0.929622	0.149829	5.81973
1700052I22Rik	0	0	0	0	0	0	0	NA	NA	NA	NA	NA	0	0
1700052K11Rik	8.49187	8.71245	8.57543	8.55352	8.44915	8.31957	370.725	0.331553	0.406669	0.815288	0.414907	0.673608	0.132029	8.517
1700052N19Rik	6.90234	6.70345	6.83936	7.0024	7.07038	7.12457	126.769	-1.08486	0.661514	-1.63996	0.101013	0.314615	0.156502	6.94042
1700054A03Rik	0	0	0	0	0	0	0	NA	NA	NA	NA	NA	0	0
1700054K19Rik	-0.371555	-0.370235	-0.367293	-0.371552	-0.371516	-0.360529	0.718979	-0.248189	3.98944	-0.0622116	0.950394	NA	0.00436546	-0.36878
1700054M17Rik	0	0	0	0	0	0	0	NA	NA	NA	NA	NA	0	0
1700054N08Rik	8.61779	9.73843	8.72486	8.41244	8.41363	8.71768	511.003	0.89837	0.528994	1.69826	0.0894583	0.292242	0.494093	8.7708
1700054O13Rik	0	0	0	0	0	0	0	NA	NA	NA	NA	NA	0	0
1700055C04Rik	0	0	0	0	0	0	0	NA	NA	NA	NA	NA	0	0
1700055N04Rik	-0.421241	-0.41989	-0.421209	-0.421239	-0.421204	-0.406687	0.692945	-1.17386	4.01144	-0.292629	0.769806	NA	0.00584993	-0.418578
1700056E22Rik	5.78689	6.22029	5.77273	5.86529	6.20861	5.78864	68.9231	-0.355184	0.819529	-0.4334	0.664724	0.841083	0.214768	5.94041
1700057G04Rik	-0.861302	-0.868411	-0.86966	-0.869889	-0.869475	-0.869875	0.439932	2.05829	4.0135	0.512842	0.608062	NA	0.00337602	-0.868102
1700057H15Rik	-1.95198	-1.9509	-1.95139	-1.95198	-1.95132	-1.95013	0.173236	-0.582649	4.07006	-0.143155	0.886168	NA	0.000701779	-1.95128
1700057K13Rik	-1.66921	-1.66993	-1.67035	-1.67065	-1.67029	-1.67043	0.146644	1.55913	4.0456	0.385388	0.69995	NA	0.000512965	-1.67014
1700058G18Rik	0	0	0	0	0	0	0	NA	NA	NA	NA	NA	0	0
1700060C16Rik	0	0	0	0	0	0	0	NA	NA	NA	NA	NA	0	0
1700060C20Rik	-0.327799	-0.331245	-0.332492	-0.332523	-0.332486	-0.32149	0.739675	0.690089	3.93014	0.175589	0.860617	NA	0.00440298	-0.329672
1700061F12Rik	0	0	0	0	0	0	0	NA	NA	NA	NA	NA	0	0
1700061G19Rik	3.52863	3.5009	3.53671	3.59562	3.59348	3.51201	11.869	-1.83075	2.15866	-0.848096	0.396385	NA	0.040698	3.54456
1700061I17Rik	0	0	0	0	0	0	0	NA	NA	NA	NA	NA	0	0
1700061J05Rik	-1.25165	-1.25011	-1.2511	-1.25165	-1.25095	-1.24589	0.346473	-0.991849	4.04905	-0.244959	0.806489	NA	0.00219631	-1.25022
1700063A18Rik	0	0	0	0	0	0	0	NA	NA	NA	NA	NA	0	0
1700063D05Rik	5.79051	5.72817	5.80041	5.8428	5.79961	5.83046	55.825	-0.424185	0.870625	-0.487219	0.626103	0.817521	0.0399953	5.79866
1700063O14Rik	0	0	0	0	0	0	0	NA	NA	NA	NA	NA	0	0
1700064J06Rik	0	0	0	0	0	0	0	NA	NA	NA	NA	NA	0	0
1700064M15Rik	2.96102	2.94999	2.97685	3.02163	2.97492	2.99276	7.94216	-2.36449	2.28159	-1.03634	0.300045	NA	0.0252649	2.97953
1700065D16Rik	3.59661	3.66804	3.56394	3.64158	3.55932	3.60724	12.491	-0.420002	2.32683	-0.180504	0.856757	NA	0.042788	3.60612
1700065I16Rik	0	0	0	0	0	0	0	NA	NA	NA	NA	NA	0	0
1700065I17Rik	2.04213	2.04269	2.04234	2.04214	2.13493	2.04636	4.39182	-2.74261	3.96643	-0.691455	0.48928	NA	0.0375105	2.05843
1700065J11Rik	2.20957	2.21021	2.2282	2.23828	2.23528	2.2454	4.70387	-4.00014	3.41489	-1.17138	0.241445	NA	0.0149484	2.22782
1700065J18Rik	0.979707	0.979975	0.979808	0.985532	1.02001	0.979787	2.02375	-3.09176	3.97042	-0.778697	0.436158	NA	0.0161037	0.98747
1700065O20Rik	0	0	0	0	0	0	0	NA	NA	NA	NA	NA	0	0
1700066B17Rik	-0.421241	-0.41989	-0.421209	-0.421239	-0.421204	-0.406687	0.692945	-1.17386	4.01144	-0.292629	0.769806	NA	0.00584993	-0.418578
1700066B19Rik	2.36867	2.36245	2.38042	2.38295	2.39251	2.40534	5.23566	-2.30319	2.64706	-0.870091	0.38425	NA	0.0156107	2.38206
1700066J24Rik	-0.294175	-0.305407	-0.306615	-0.303117	-0.306609	-0.306622	0.751577	1.01409	3.96982	0.255449	0.798376	NA	0.00488786	-0.303757
1700066M21Rik	7.41852	6.80835	7.45483	7.64842	7.80843	7.98005	209.986	-2.4424	1.09401	-2.23253	0.0255802	0.134462	0.408002	7.51977
1700066N21Rik	0	0	0	0	0	0	0	NA	NA	NA	NA	NA	0	0
1700066O22Rik	0	0	0	0	0	0	0	NA	NA	NA	NA	NA	0	0
1700067G17Rik	-1.95198	-1.9509	-1.95139	-1.95198	-1.95132	-1.95013	0.173236	-0.582649	4.07006	-0.143155	0.886168	NA	0.000701779	-1.95128
1700067K01Rik	2.18428	2.18143	2.18105	2.19632	2.26433	2.18505	4.75441	-3.47312	3.3353	-1.04132	0.297727	NA	0.0326104	2.19874
1700067P10Rik	0.753248	0.753478	0.753334	0.753254	0.78865	0.757357	1.72745	-2.39239	3.99823	-0.598362	0.549599	NA	0.0141832	0.759887
1700069L16Rik	0	0	0	0	0	0	0	NA	NA	NA	NA	NA	0	0
1700069P05Rik	0	0	0	0	0	0	0	NA	NA	NA	NA	NA	0	0
1700071K01Rik	-1.95198	-1.9509	-1.95139	-1.95198	-1.95132	-1.95013	0.173236	-0.582649	4.07006	-0.143155	0.886168	NA	0.000701779	-1.95128
1700071M16Rik	0.612956	0.61316	0.617618	0.63573	0.613047	0.620993	1.53575	-1.57173	3.90619	-0.40237	0.687412	NA	0.00885203	0.618917
1700072B07Rik	0	0	0	0	0	0	0	NA	NA	NA	NA	NA	0	0
1700072O05Rik	0	0	0	0	0	0	0	NA	NA	NA	NA	NA	0	0
1700073E17Rik	9.19408	10.2846	9.41332	10.0651	10.5201	9.63133	1026.8	-0.675084	0.330701	-2.04137	0.0412138	0.180941	0.520168	9.85142
1700074H08Rik	-1.25165	-1.25011	-1.2511	-1.25165	-1.25095	-1.24589	0.346473	-0.991849	4.04905	-0.244959	0.806489	NA	0.00219631	-1.25022
1700074P13Rik	0	0	0	0	0	0	0	NA	NA	NA	NA	NA	0	0
1700080E11Rik	0	0	0	0	0	0	0	NA	NA	NA	NA	NA	0	0
1700080N15Rik	0	0	0	0	0	0	0	NA	NA	NA	NA	NA	0	0
1700080O16Rik	0	0	0	0	0	0	0	NA	NA	NA	NA	NA	0	0
1700081H04Rik	0	0	0	0	0	0	0	NA	NA	NA	NA	NA	0	0
1700081H22Rik	0	0	0	0	0	0	0	NA	NA	NA	NA	NA	0	0
1700081L11Rik	11.4259	10.8249	10.9375	11.0694	10.7523	10.5705	2011.37	0.358544	0.220064	1.62927	0.103255	0.318213	0.295717	10.9301
1700084C01Rik	1.22514	1.21518	1.21499	1.23021	1.23528	1.22298	2.33453	-2.512	3.88097	-0.64726	0.517464	NA	0.00808681	1.22396
1700084E18Rik	4.72312	5.00263	4.75545	4.74797	4.8037	4.7882	29.7767	0.0536025	1.23316	0.0434676	0.965329	0.986345	0.101725	4.80351
1700084F23Rik	0	0	0	0	0	0	0	NA	NA	NA	NA	NA	0	0
1700084J12Rik	9.85686	9.7703	9.89054	9.69012	9.69819	10.1346	927.358	0.00160162	0.289891	0.00552492	0.995592	0.998132	0.16555	9.84009
1700085B03Rik	0	0	0	0	0	0	0	NA	NA	NA	NA	NA	0	0
1700085C21Rik	0	0	0	0	0	0	0	NA	NA	NA	NA	NA	0	0
1700086L19Rik	7.49862	8.1902	8.58513	8.20792	9.03445	9.33829	449.001	-1.63523	0.373522	-4.37785	1.2e-05	0.000377147	0.659717	8.47577
1700086O06Rik	6.67944	7.18179	6.80438	6.79498	6.69629	6.79672	119.924	0.404278	0.764958	0.528497	0.597155	0.798548	0.182854	6.8256
1700088E04Rik	3.4325	3.40813	3.4746	3.49747	3.40731	3.47371	11.0764	-0.449678	2.33456	-0.192618	0.847258	NA	0.0382	3.44895
1700090G07Rik	0	0	0	0	0	0	0	NA	NA	NA	NA	NA	0	0
1700091E21Rik	0	0	0	0	0	0	0	NA	NA	NA	NA	NA	0	0
1700092C02Rik	0	0	0	0	0	0	0	NA	NA	NA	NA	NA	0	0
1700092C10Rik	0	0	0	0	0	0	0	NA	NA	NA	NA	NA	0	0
1700092E19Rik	0	0	0	0	0	0	0	NA	NA	NA	NA	NA	0	0
1700092K14Rik	0	0	0	0	0	0	0	NA	NA	NA	NA	NA	0	0
1700092M07Rik	3.0631	2.98812	3.05013	3.00257	2.98752	3.01925	8.20849	1.47283	2.60298	0.565826	0.571512	NA	0.0320224	3.01845
1700093K21Rik	0	0	0	0	0	0	0	NA	NA	NA	NA	NA	0	0
1700094D03Rik	7.03565	7.15125	7.24711	7.13541	7.41205	6.99273	147.623	-0.0896274	0.665959	-0.134584	0.892941	0.952512	0.151794	7.16237
1700094J05Rik	0	0	0	0	0	0	0	NA	NA	NA	NA	NA	0	0
1700094M24Rik	0	0	0	0	0	0	0	NA	NA	NA	NA	NA	0	0
1700095A21Rik	-2.01158	-2.01162	-2.01183	-2.01208	-2.0118	-2.01187	0.073322	1.16606	4.06331	0.286973	0.774133	NA	0.000182565	-2.0118
1700095B10Rik	0	0	0	0	0	0	0	NA	NA	NA	NA	NA	0	0
1700095B22Rik	0	0	0	0	0	0	0	NA	NA	NA	NA	NA	0	0
1700096J18Rik	-1.14649	-1.14518	-1.14615	-1.14367	-1.146	-1.1437	0.338238	-1.7756	4.02258	-0.441409	0.658917	NA	0.00125025	-1.1452
1700096K18Rik	6.43996	6.48953	6.61191	6.50492	6.41401	6.71462	94.564	-0.115866	0.711872	-0.162762	0.870706	0.943534	0.113681	6.52916
1700097N02Rik	1.36103	1.34944	1.35382	1.37566	1.34925	1.3651	2.56048	-0.746437	3.87205	-0.192776	0.847135	NA	0.010314	1.35905
1700100L14Rik	2.44206	2.42735	2.49353	2.47016	2.42694	2.42683	5.54647	1.537	3.85188	0.399025	0.689875	NA	0.0279923	2.44781
1700101E01Rik	1.58139	1.5715	1.59854	1.57884	1.57128	1.59507	3.00497	0.484146	3.80889	0.127109	0.898854	NA	0.0116293	1.58277
1700101I11Rik	5.70239	5.46905	5.71807	5.63994	5.85143	5.60046	53.0342	-0.775648	1.53122	-0.506556	0.612466	0.808721	0.128178	5.66356
1700101O22Rik	0	0	0	0	0	0	0	NA	NA	NA	NA	NA	0	0
1700102H20Rik	3.43785	3.43061	3.49738	3.45445	3.5094	3.50398	11.2722	-2.10061	2.08697	-1.00654	0.314157	NA	0.03536	3.47228
1700102P08Rik	4.93954	5.21049	5.0467	5.08593	4.89864	4.95193	34.8229	1.76975	1.79549	0.985665	0.324298	0.595701	0.115891	5.0222
1700104A03Rik	0	0	0	0	0	0	0	NA	NA	NA	NA	NA	0	0
1700105P06Rik	1.54949	1.51303	1.52649	1.52416	1.51282	1.51677	2.87913	1.48894	3.88075	0.383673	0.701221	NA	0.0138077	1.52379
1700106J16Rik	0	0	0	0	0	0	0	NA	NA	NA	NA	NA	0	0
1700106N22Rik	7.11021	7.47805	7.63656	7.35388	7.56996	7.54519	181.481	-0.356748	0.572085	-0.623592	0.532896	0.757531	0.191694	7.44897
1700108F19Rik	4.20926	4.19356	4.23587	4.319	4.41408	4.24259	20.264	-3.03123	1.79473	-1.68896	0.0912265	0.295817	0.0831893	4.26906
1700108J01Rik	0	0	0	0	0	0	0	NA	NA	NA	NA	NA	0	0
1700108M19Rik	0.254878	0.240119	0.239838	0.243586	0.239849	0.247713	1.17137	-0.086546	3.91481	-0.0221073	0.982362	NA	0.00602065	0.24433
1700109F18Rik	2.08235	2.07258	2.09514	2.08172	2.10762	2.0922	4.26918	-1.17522	2.88508	-0.407344	0.683756	NA	0.0123334	2.0886
1700109G14Rik	0	0	0	0	0	0	0	NA	NA	NA	NA	NA	0	0
1700109G15Rik	0	0	0	0	0	0	0	NA	NA	NA	NA	NA	0	0
1700109H08Rik	4.53179	4.72089	4.5386	4.5082	4.53627	4.5253	24.7565	0.993571	1.26262	0.786909	0.431335	0.685856	0.0794842	4.56018
1700109I08Rik	0	0	0	0	0	0	0	NA	NA	NA	NA	NA	0	0
1700110C19Rik	1.29152	1.29185	1.29164	1.29153	1.3368	1.30369	2.51799	-3.04745	3.98048	-0.7656	0.443914	NA	0.0181075	1.30117
1700110I01Rik	-1.14527	-1.14769	-1.14856	-1.14758	-1.14843	-1.14872	0.302467	0.859796	3.99359	0.215294	0.829538	NA	0.00128352	-1.14771
1700110K17Rik	-1.25165	-1.25011	-1.2511	-1.25165	-1.25095	-1.24589	0.346473	-0.991849	4.04905	-0.244959	0.806489	NA	0.00219631	-1.25022
1700110M21Rik	-1.66921	-1.66993	-1.67035	-1.67065	-1.67029	-1.67043	0.146644	1.55913	4.0456	0.385388	0.69995	NA	0.000512965	-1.67014
1700111N16Rik	0	0	0	0	0	0	0	NA	NA	NA	NA	NA	0	0
1700112E06Rik	5.41568	5.58857	5.45482	5.39155	5.34825	5.49381	45.0131	0.765967	1.08098	0.708586	0.478582	0.720571	0.0849475	5.44878
1700112H15Rik	1.54201	1.5424	1.54216	1.57421	1.54218	1.5775	2.96164	-4.66605	3.9246	-1.18893	0.234469	NA	0.0174173	1.55341
1700113A16Rik	8.56472	9.19496	8.61255	8.78798	9.28651	8.38757	482.504	-0.0426211	0.382251	-0.1115	0.91122	0.961715	0.361448	8.80572
1700113H08Rik	0	0	0	0	0	0	0	NA	NA	NA	NA	NA	0	0
1700113I22Rik	7.15529	7.35493	7.27752	7.666	7.6446	7.74602	188.502	-1.38005	0.534412	-2.58238	0.00981226	0.0696944	0.24262	7.47406
1700119H24Rik	0	0	0	0	0	0	0	NA	NA	NA	NA	NA	0	0
1700120C14Rik	3.63905	3.82637	3.62904	3.63243	3.64502	3.70093	13.9147	0.754732	2.2667	0.332966	0.73916	0.88189	0.0769607	3.67881
1700120E14Rik	0	0	0	0	0	0	0	NA	NA	NA	NA	NA	0	0
1700120G07Rik	0	0	0	0	0	0	0	NA	NA	NA	NA	NA	0	0
1700120K04Rik	2.22108	2.19613	2.21412	2.20328	2.23112	2.2157	4.64731	-0.702585	2.84962	-0.246554	0.805253	NA	0.0124837	2.21357
1700121L16Rik	-0.796595	-0.798034	-0.799385	-0.792947	-0.799185	-0.79951	0.476647	-0.0629498	3.97474	-0.0158375	0.987364	NA	0.00253754	-0.79761
1700121N20Rik	0	0	0	0	0	0	0	NA	NA	NA	NA	NA	0	0
1700122O11Rik	0	0	0	0	0	0	0	NA	NA	NA	NA	NA	0	0
1700123I01Rik	2.00026	1.97861	2.03201	1.97809	1.97831	1.99426	4.03737	2.82351	3.88893	0.726036	0.467817	NA	0.0210671	1.99359
1700123K08Rik	0	0	0	0	0	0	0	NA	NA	NA	NA	NA	0	0
1700123L14Rik	1.03394	1.0325	1.03233	1.06975	1.03235	1.04028	2.06981	-2.41385	3.91904	-0.615929	0.537941	NA	0.0148015	1.04019
1700123M08Rik	4.2269	4.19525	4.25603	4.31733	4.22103	4.2646	19.1884	-0.973089	1.40747	-0.691373	0.489331	0.728225	0.0426488	4.24686
1700123O12Rik	-1.95198	-1.9509	-1.95139	-1.95198	-1.95132	-1.95013	0.173236	-0.582649	4.07006	-0.143155	0.886168	NA	0.000701779	-1.95128
1700123O20Rik	9.55896	9.33835	9.52708	9.47971	9.86472	9.57312	763.648	-0.26169	0.34143	-0.766451	0.443408	0.695642	0.172992	9.55699
1700123O21Rik	-0.693443	-0.691995	-0.689438	-0.693441	-0.69331	-0.686502	0.545743	-0.0471673	3.9993	-0.0117939	0.99059	NA	0.00283436	-0.691355
1700125D06Rik	-1.25165	-1.25011	-1.2511	-1.25165	-1.25095	-1.24589	0.346473	-0.991849	4.04905	-0.244959	0.806489	NA	0.00219631	-1.25022
1700125G02Rik	0	0	0	0	0	0	0	NA	NA	NA	NA	NA	0	0
1700125G22Rik	0	0	0	0	0	0	0	NA	NA	NA	NA	NA	0	0
1700125H03Rik	2.55314	2.54016	2.59787	2.57559	2.53972	2.5675	5.95726	0.1664	2.96335	0.0561528	0.95522	NA	0.0225949	2.56233
1700125H20Rik	0.692745	0.692964	0.70659	0.692751	0.692842	0.716639	1.63723	-0.0592761	3.9676	-0.01494	0.98808	NA	0.0102102	0.699088
1700126H18Rik	0	0	0	0	0	0	0	NA	NA	NA	NA	NA	0	0
1700128A07Rik	0	0	0	0	0	0	0	NA	NA	NA	NA	NA	0	0
1700128F08Rik	4.25914	4.38752	4.28495	4.26508	4.21149	4.3098	20.1652	1.21677	1.91306	0.636032	0.524756	0.752287	0.0593026	4.28633
1700129C05Rik	0	0	0	0	0	0	0	NA	NA	NA	NA	NA	0	0
1810006J02Rik	0	0	0	0	0	0	0	NA	NA	NA	NA	NA	0	0
1810006K21Rik	9.77569	10.8634	10.1386	11.261	11.9488	10.8929	2178.87	-1.4624	0.268033	-5.45605	4.87e-08	3.07e-06	0.778529	10.8134
1810007C17Rik	0	0	0	0	0	0	0	NA	NA	NA	NA	NA	0	0
1810007D17Rik	0	0	0	0	0	0	0	NA	NA	NA	NA	NA	0	0
1810007I06Rik	-1.95219	-1.95095	-1.94996	-1.95219	-1.95143	-1.95163	0.19927	1.18861	4.06753	0.292218	0.77012	NA	0.000847694	-1.95139
1810008A18Rik	10.2087	10.856	9.81704	9.57511	9.32506	9.62649	1090.55	1.14993	0.412137	2.79015	0.0052683	0.0448572	0.552629	9.9014
1810008I18Rik	4.08446	4.02209	4.03478	4.10834	4.11991	4.14285	17.2458	-3.00964	1.84146	-1.63437	0.10218	0.316024	0.0481435	4.0854
1810009A15Rik	8.64958	9.50356	8.92455	8.84169	9.60564	9.42462	617.596	-0.468837	0.3349	-1.39993	0.161534	0.411876	0.40098	9.15827
1810009J06Rik	0	0	0	0	0	0	0	NA	NA	NA	NA	NA	0	0
1810010D01Rik	-1.95198	-1.9509	-1.95139	-1.95198	-1.95132	-1.95013	0.173236	-0.582649	4.07006	-0.143155	0.886168	NA	0.000701779	-1.95128
1810010H24Rik	5.12744	5.48859	5.18463	5.07353	5.1474	5.15935	40.4113	1.41846	1.07432	1.32033	0.186723	0.445074	0.147744	5.19682
1810011H11Rik	0	0	0	0	0	0	0	NA	NA	NA	NA	NA	0	0
1810011O10Rik	7.40991	8.16413	8.0188	7.94624	8.29117	8.59575	299.98	-1.10968	0.501327	-2.21348	0.0268643	0.138151	0.396948	8.071
1810012K16Rik	3.76688	3.9077	3.78518	3.8254	3.7729	3.80927	14.5643	-0.36243	1.79939	-0.201419	0.840371	0.929906	0.0522027	3.81122
1810012P15Rik	5.52156	5.57883	5.48758	5.53886	5.55124	5.48615	46.3862	0.0248177	0.935455	0.0265301	0.978834	0.992183	0.0365145	5.52737
1810013A23Rik	0.721669	0.715023	0.742133	0.714807	0.714899	0.71889	1.66215	2.74729	3.94681	0.696079	0.486379	NA	0.0106064	0.721237
1810013D10Rik	8.33628	8.63668	8.49639	8.86439	8.73689	8.96413	421.325	-0.752296	0.400039	-1.88056	0.0600322	0.227968	0.232962	8.67246
1810013L24Rik	12.4386	11.5751	12.1609	12.6604	12.0741	11.8432	4667.79	-0.165287	0.246238	-0.671249	0.502062	0.737605	0.392582	12.1254
1810014B01Rik	5.12648	5.33289	5.2154	5.2692	5.25569	5.23414	38.6061	-0.666245	1.16554	-0.571621	0.567579	0.779776	0.0681873	5.23897
1810014F10Rik	8.05187	8.51265	8.02978	8.41125	8.53805	8.39016	331.411	-0.596497	0.433498	-1.37601	0.168819	0.421389	0.225387	8.32229
1810018F18Rik	0	0	0	0	0	0	0	NA	NA	NA	NA	NA	0	0
1810019D21Rik	3.01735	3.01849	3.04552	3.03108	3.15567	3.02991	8.73173	-4.39139	2.86481	-1.53287	0.125308	NA	0.0529273	3.04967
1810019J16Rik	-1.25165	-1.25011	-1.2511	-1.25165	-1.25095	-1.24589	0.346473	-0.991849	4.04905	-0.244959	0.806489	NA	0.00219631	-1.25022
1810020D17Rik	8.53736	8.97941	8.76933	8.69249	9.14958	8.94412	473.138	-0.32239	0.335827	-0.959989	0.337061	0.607301	0.221037	8.84538
1810020O05Rik	2.74773	2.87325	2.74809	2.74775	2.76389	2.76852	7.33035	-0.479958	3.53015	-0.13596	0.891853	NA	0.0490482	2.77487
1810021B22Rik	2.98935	2.95465	2.99936	2.98434	2.98462	2.99361	7.91702	-0.973729	2.32659	-0.418522	0.675566	NA	0.0156091	2.98432
1810022K09Rik	10.0598	11.2692	10.2695	10.7677	11.6174	10.3939	1928.45	-0.52842	0.255001	-2.07223	0.0382441	0.172158	0.608904	10.7296
1810024B03Rik	2.71711	2.71803	2.73601	2.72106	2.84192	2.72553	7.08136	-3.31333	3.03757	-1.09078	0.275369	NA	0.0488126	2.74328
1810026B05Rik	10.6637	11.4766	10.8336	10.8266	11.4003	10.8997	2153.25	-0.0691425	0.206967	-0.334075	0.738323	0.881428	0.336619	11.0168
1810026J23Rik	10.717	10.6039	10.338	10.5235	10.099	10.4085	1420.6	0.293267	0.272702	1.07541	0.282191	0.55665	0.218083	10.4483
1810027O10Rik	8.80786	9.54409	9.13837	9.47632	10.0402	9.53089	742.008	-0.864854	0.301131	-2.87202	0.00407858	0.0369464	0.41702	9.42296
1810029B16Rik	9.80066	10.2678	9.75311	10.0657	10.1867	9.91835	1041.36	-0.179379	0.270061	-0.664215	0.506553	0.740515	0.20892	9.99872
1810030J14Rik	0	0	0	0	0	0	0	NA	NA	NA	NA	NA	0	0
1810030N24Rik	7.90743	8.69344	8.14507	8.33112	8.60348	8.20481	338.236	-0.342494	0.460966	-0.742991	0.457487	0.70597	0.29456	8.31423
1810030O07Rik	9.93379	9.26601	9.93181	9.92713	10.4281	10.3166	1062.68	-0.767046	0.396861	-1.93278	0.0532632	0.211683	0.407469	9.96724
1810031K17Rik	10.8517	10.9302	10.4599	10.8076	10.4173	10.3593	1628.57	0.298746	0.253561	1.1782	0.238717	0.508852	0.252156	10.6377
1810032O08Rik	8.8608	10.1006	9.04053	9.35122	9.67639	8.94189	720.648	-0.00607575	0.397484	-0.0152855	0.987804	0.995671	0.483481	9.32857
1810033B17Rik	4.03975	4.53414	4.07249	4.03987	4.04164	4.04656	23.1194	3.3458	2.43082	1.37641	0.168696	0.421388	0.198829	4.12908
1810034E14Rik	6.13062	5.71662	5.9647	5.98946	6.01419	5.89552	64.4998	-0.840165	1.40799	-0.596711	0.5507	0.769013	0.138515	5.95185
1810035I16Rik	5.13755	5.54158	5.20952	5.1489	5.23811	5.16405	41.7789	0.760769	1.05923	0.718228	0.472617	0.71606	0.152609	5.23995
1810035L17Rik	8.8783	9.26842	9.04259	9.87478	10.4221	9.52165	840.251	-1.39181	0.334102	-4.16582	3.1e-05	0.00081547	0.572815	9.50131
1810037I17Rik	10.6688	11.9814	11.2879	11.4873	12.3176	11.622	3317.08	-0.626809	0.224931	-2.78667	0.00532522	0.0451462	0.570796	11.5608
1810041L15Rik	9.55225	8.91858	9.35884	8.05293	7.92811	8.60798	530.517	2.06949	0.425751	4.8608	1.17e-06	5.14e-05	0.666813	8.73645
1810043G02Rik	8.36365	9.2355	8.56227	8.60275	9.1471	8.98404	483.412	-0.394706	0.386355	-1.02161	0.306964	0.57816	0.354491	8.81589
1810043H04Rik	7.88514	9.08399	8.12355	8.30849	8.64376	8.27003	377.903	-0.198836	0.502144	-0.395974	0.692124	0.855727	0.42257	8.38583
1810044D09Rik	3.23298	3.2085	3.2262	3.28897	3.21812	3.28876	9.60897	-2.11032	2.1003	-1.00477	0.315006	NA	0.0357601	3.24392
1810046J19Rik	9.42133	10.2982	9.90835	10.0939	10.9283	10.5054	1288.83	-0.911162	0.232527	-3.91851	8.91e-05	0.00194163	0.516848	10.1926
1810046K07Rik	4.3671	4.53198	4.42526	4.37373	4.48056	4.39973	22.3665	0.250289	1.28603	0.194622	0.845689	0.931625	0.0648345	4.42973
1810048J11Rik	9.36497	9.37838	9.50001	9.56242	8.92766	9.43826	672.535	0.186881	0.363597	0.513978	0.607267	0.805259	0.225372	9.36195
1810049H13Rik	5.86637	6.10376	5.84396	5.95806	6.14025	5.88779	65.4439	-0.504331	0.819163	-0.615666	0.538115	0.760897	0.126756	5.9667
1810053B23Rik	0	0	0	0	0	0	0	NA	NA	NA	NA	NA	0	0
1810055G02Rik	12.6213	13.0438	12.4235	12.2688	12.1526	12.2747	5836.32	0.557709	0.230475	2.41982	0.0155283	0.09558	0.326644	12.4641
1810058I24Rik	11.4869	12.3703	11.7672	12.6133	13.2339	12.3392	5630.08	-1.03324	0.205294	-5.03299	4.83e-07	2.38e-05	0.619965	12.3018
1810062G17Rik	6.05126	6.62523	6.26996	6.27271	6.39949	6.32404	86.6652	-0.834452	1.02243	-0.816147	0.414416	0.673472	0.187819	6.32378
1810062O18Rik	5.74687	6.07633	5.78548	5.8044	6.02099	5.76713	61.9423	-0.0605157	0.848672	-0.0713063	0.943154	0.976164	0.14318	5.86687
1810063B05Rik	6.68327	7.03523	6.61851	6.8217	6.81219	6.76267	114.49	-0.222234	0.712622	-0.311854	0.755152	0.889506	0.143646	6.78893
1810063B07Rik	9.27368	10.2596	9.41289	9.72295	10.0958	9.71402	912.957	-0.322218	0.322973	-0.997661	0.318444	0.589595	0.379915	9.74647
1810064F22Rik	4.25827	4.32308	4.19476	4.23035	4.18712	4.26926	19.4041	0.588917	1.60704	0.36646	0.714022	0.866786	0.0508758	4.24381
1810065E05Rik	0	0	0	0	0	0	0	NA	NA	NA	NA	NA	0	0
1810074P20Rik	11.0377	11.1486	11.3	11.4234	11.4101	11.463	2538.8	-0.348957	0.197419	-1.7676	0.0771278	0.266479	0.170626	11.2971
2010001E11Rik	3.71886	3.64841	3.76906	3.69094	3.64743	3.70656	13.2285	0.912893	2.14953	0.424694	0.67106	0.844688	0.0460815	3.69687
2010001M06Rik	-0.643728	-0.642264	-0.635588	-0.643726	-0.64364	-0.64016	0.571777	0.662832	4.00045	0.16569	0.868401	NA	0.00321958	-0.641517
2010001M09Rik	-0.735394	-0.73388	-0.73535	-0.735392	-0.735133	-0.724819	0.519709	-1.12718	4.02784	-0.279847	0.779595	NA	0.00420923	-0.733328
2010002M12Rik	0.115091	0.109103	0.108503	0.117767	0.108512	0.116251	1.05226	-1.06142	3.93835	-0.26951	0.787537	NA	0.00428828	0.112538
2010002N04Rik	13.4739	14.0173	14.0441	13.6588	14.262	14.2179	16180.3	-0.234292	0.142409	-1.64521	0.0999265	0.312648	0.314276	13.9457
2010003K11Rik	0.238156	0.238471	0.265346	0.238161	0.238227	0.238204	1.19562	1.92905	3.99989	0.482275	0.629611	NA	0.011065	0.242761
2010003K15Rik	-1.95198	-1.9509	-1.95139	-1.95198	-1.95132	-1.95013	0.173236	-0.582649	4.07006	-0.143155	0.886168	NA	0.000701779	-1.95128
2010003O02Rik	8.11864	9.26926	8.49602	8.57571	9.2471	8.41824	468.443	-0.269103	0.418752	-0.642632	0.520463	0.749648	0.468369	8.6875
2010005H15Rik	4.22927	4.14748	4.18317	4.22487	4.29502	4.22103	18.8997	-1.85832	1.82188	-1.02	0.307726	0.579029	0.0495836	4.21681
2010009K17Rik	1.91902	1.89911	1.91254	1.9234	1.89883	1.92646	3.76284	-0.192796	3.495	-0.0551636	0.956008	NA	0.0119944	1.91323
2010010A06Rik	0.321863	0.32203	0.321926	0.342729	0.321937	0.329875	1.25398	-3.14446	3.93553	-0.798994	0.424294	NA	0.00845818	0.326727
2010011I20Rik	8.96598	9.83907	8.99834	9.13578	9.29841	9.21665	639.929	0.0562143	0.395933	0.141979	0.887096	0.949962	0.318485	9.24237
2010012O05Rik	9.08097	9.69513	9.17559	9.10627	9.80903	9.30017	690.599	-0.145167	0.290926	-0.498981	0.617793	0.813022	0.314248	9.36119
2010015L04Rik	9.57514	9.81531	10.0021	9.49136	9.76258	9.97671	889.375	0.0857176	0.262477	0.326572	0.743991	0.88355	0.207045	9.77054
2010016I18Rik	-0.428036	-0.426682	-0.428005	-0.42453	-0.428	-0.417131	0.68471	-2.42421	3.98646	-0.60811	0.543114	NA	0.00427267	-0.425397
2010106C02Rik	-0.632223	-0.630847	-0.632199	-0.620788	-0.632194	-0.632204	0.577505	-1.09265	3.98032	-0.274513	0.78369	NA	0.00458246	-0.630076
2010106E10Rik	0	0	0	0	0	0	0	NA	NA	NA	NA	NA	0	0
2010106G01Rik	11.9558	11.8866	11.7168	12.2311	12.0949	11.9068	4036.25	-0.277416	0.170501	-1.62707	0.103722	0.319053	0.178285	11.9653
2010107E04Rik	9.29391	10.4681	9.81445	10.2144	11.1884	10.2124	1362.37	-0.97089	0.273058	-3.55562	0.000377084	0.00611473	0.635421	10.1986
2010107G12Rik	4.0358	3.98653	4.02681	4.03644	4.05601	4.14831	16.9514	-2.2033	1.80895	-1.218	0.223224	0.490077	0.0541012	4.04832
2010107G23Rik	3.71271	3.6954	3.77906	3.83382	3.69439	3.7573	13.7995	-0.62444	2.22506	-0.28064	0.778987	0.900004	0.0552509	3.74544
2010107H07Rik	7.01122	7.6758	7.22132	7.32757	7.7528	7.33848	182.29	-0.668079	0.568607	-1.17494	0.240019	0.510556	0.279911	7.38786
2010109A12Rik	-0.269179	-0.272702	-0.273892	-0.266821	-0.26916	-0.273899	0.771999	-0.666632	3.95385	-0.168603	0.866109	NA	0.00296001	-0.270942
2010109I03Rik	6.65941	7.17993	6.64353	6.6361	6.56338	6.78495	116.844	0.581137	0.831885	0.698579	0.484815	0.724169	0.225044	6.74455
2010109K11Rik	9.95988	9.65201	9.61746	9.88959	9.86373	10.0722	929.565	-0.307923	0.303661	-1.01404	0.310566	0.581349	0.176708	9.84247
2010110P09Rik	0.180093	0.172215	0.180759	0.1717	0.171761	0.179598	1.11162	2.00391	3.93314	0.509494	0.610406	NA	0.00454153	0.176021
2010111I01Rik	12.523	12.9022	12.6489	11.9787	11.9057	12.2265	5508.78	0.790809	0.211507	3.73893	0.000184803	0.0034907	0.393326	12.3642
2010204K13Rik	5.61146	5.64718	5.5849	5.76611	5.73513	5.71694	51.9641	-1.11509	0.905708	-1.23119	0.218254	0.484384	0.072913	5.67695
2010300C02Rik	5.07913	4.92815	5.1214	5.07058	4.97995	5.14981	34.1515	-1.06191	1.40531	-0.75564	0.449865	0.700694	0.084789	5.05484
2010305A19Rik	7.24265	7.06361	6.77252	7.0733	7.22708	6.99329	138.611	-0.402721	0.674496	-0.59707	0.550461	0.768934	0.172357	7.06208
2010308F09Rik	-1.95219	-1.95095	-1.94996	-1.95219	-1.95143	-1.95163	0.19927	1.18861	4.06753	0.292218	0.77012	NA	0.000847694	-1.95139
2010310C07Rik	-0.949466	-0.950794	-0.951915	-0.947574	-0.951749	-0.952129	0.394146	0.0807414	3.97926	0.0202906	0.983812	NA	0.00178164	-0.950605
2010315B03Rik	8.96932	9.24382	8.99441	8.6587	9.18647	9.04707	529.681	0.205953	0.352543	0.584192	0.559091	0.774254	0.206023	9.01663
2010317E24Rik	5.05547	5.35725	5.24697	4.98711	4.98963	5.17427	38.742	6.02564	1.92447	3.13107	0.00174172	0.0196154	0.150201	5.13512
2010320M18Rik	8.15819	8.5283	8.31188	8.46869	8.88154	8.5996	374.952	-0.682054	0.371578	-1.83556	0.0664223	0.242848	0.248615	8.49137
2010321M09Rik	10.8749	11.1412	11.09	11.0398	11.2369	11.1907	2199.96	-0.158363	0.196448	-0.80613	0.420168	0.677242	0.128795	11.0956
2200002D01Rik	4.5149	4.92113	4.46441	4.48167	4.44718	4.50127	28.5245	1.54566	1.89623	0.81512	0.415004	0.673608	0.18097	4.55509
2200002J24Rik	-1.95198	-1.9509	-1.95139	-1.95198	-1.95132	-1.95013	0.173236	-0.582649	4.07006	-0.143155	0.886168	NA	0.000701779	-1.95128
2200002K05Rik	1.89544	1.89595	1.96659	1.89546	1.89567	1.91167	3.88127	1.02526	3.95971	0.258922	0.795695	NA	0.0283941	1.91013
2210009G21Rik	6.91999	6.79049	6.99544	7.04229	7.12783	7.1707	131.882	-0.878213	0.632787	-1.38785	0.165183	0.4167	0.139442	7.00779
2210010C04Rik	1.28921	1.28096	1.28075	1.29028	1.31104	1.28876	2.45777	-2.65699	3.88074	-0.68466	0.493559	NA	0.011064	1.29017
2210010C17Rik	0.666091	0.662877	0.662745	0.676059	0.662759	0.682533	1.59033	-2.02038	3.9214	-0.515219	0.6064	NA	0.00844837	0.668844
2210012G02Rik	8.16075	8.58451	8.61011	8.73147	8.72283	8.77297	398.771	-0.627518	0.422194	-1.48633	0.137193	0.374983	0.226064	8.59711
2210013O21Rik	9.89327	10.5034	10.1977	10.2464	10.8337	10.3092	1337.21	-0.376889	0.239958	-1.57064	0.116266	0.341108	0.316047	10.3306
2210015D19Rik	7.81898	7.23867	7.63963	7.72648	7.97163	7.74232	217.006	-0.792401	0.684915	-1.15693	0.2473	0.519266	0.247489	7.68962
2210016F16Rik	10.3299	10.5685	10.4441	10.527	11.0251	10.7805	1601.96	-0.451319	0.225812	-1.99865	0.0456465	0.192778	0.251364	10.6125
2210016L21Rik	9.2038	10.0213	9.24919	9.34967	9.2816	9.24999	708.164	0.304691	0.398346	0.764891	0.444336	0.69686	0.311769	9.39259
2210018M11Rik	10.195	10.8697	9.98889	9.81934	9.67447	9.73234	1152.52	0.879532	0.352034	2.49843	0.0124745	0.0816703	0.445373	10.0466
2210019I11Rik	0	0	0	0	0	0	0	NA	NA	NA	NA	NA	0	0
2210020M01Rik	8.25444	8.91462	9.30225	8.97362	9.84918	10.5203	828.464	-1.539	0.289493	-5.31617	1.06e-07	6.15e-06	0.79233	9.3024
2210021J22Rik	7.40451	7.72873	7.41664	7.54361	7.75116	7.79905	201.123	-0.566068	0.534495	-1.05907	0.289567	0.562704	0.175352	7.60728
2210039B01Rik	5.5404	5.44917	5.54492	5.49102	5.4424	5.48798	45.2529	0.329785	0.950684	0.346893	0.728672	0.876484	0.0434794	5.49265
2210403K04Rik	12.8845	13.0346	13.0501	12.5737	13.0089	12.7582	7636.76	0.250399	0.170899	1.46518	0.142871	0.383564	0.188672	12.885
2210404J11Rik	8.38348	9.21183	8.47135	8.50938	8.49495	8.53314	414.479	0.307209	0.48348	0.635413	0.525159	0.752471	0.303803	8.60069
2210404O07Rik	-1.2405	-1.23889	-1.23705	-1.2405	-1.23979	-1.23725	0.372507	0.307221	4.02003	0.0764225	0.939083	NA	0.00154957	-1.239
2210404O09Rik	6.27503	6.21495	6.26852	6.37239	6.11639	6.32254	77.8557	-0.00310131	0.796495	-0.0038937	0.996893	0.9982	0.0888576	6.26163
2210407C18Rik	0	0	0	0	0	0	0	NA	NA	NA	NA	NA	0	0
2210408F21Rik	5.70247	6.04424	5.73772	5.82755	5.92678	5.85031	60.4856	-0.707808	0.936895	-0.755483	0.449959	0.700694	0.125283	5.84818
2210408I21Rik	9.08545	7.57452	9.31665	9.65271	9.31976	9.542	657.783	-1.69241	0.667911	-2.53388	0.0112807	0.0765754	0.764382	9.08185
2210409D07Rik	0	0	0	0	0	0	0	NA	NA	NA	NA	NA	0	0
2210409E12Rik	-0.254875	-0.253665	-0.237768	-0.254872	-0.254831	-0.254845	0.797081	1.86805	4.01979	0.464713	0.642137	NA	0.00689522	-0.251809
2210411K11Rik	8.6468	8.85176	8.43906	8.78826	9.02509	9.11454	464.751	-0.645496	0.409706	-1.57551	0.115139	0.338943	0.247164	8.81092
2210414B05Rik	0	0	0	0	0	0	0	NA	NA	NA	NA	NA	0	0
2210415F13Rik	0.169441	0.169961	0.183029	0.169445	0.169507	0.181295	1.11752	0.304891	3.97502	0.0767018	0.938861	NA	0.00651902	0.17378
2210416O15Rik	1.96761	1.93614	1.94499	1.97516	1.93586	1.94378	3.87065	0.220256	3.48129	0.0632685	0.949553	NA	0.0167134	1.95059
2210417A02Rik	1.64873	1.63885	1.66142	1.64232	1.63862	1.67406	3.16041	0.544318	3.77042	0.144365	0.885212	NA	0.0142899	1.65067
2210417K05Rik	4.37709	4.33992	4.47811	4.49307	4.41924	4.40973	21.8289	-1.93737	1.74125	-1.11263	0.265868	0.539174	0.058437	4.41953
2210420H20Rik	-0.949466	-0.950794	-0.951915	-0.947574	-0.951749	-0.952129	0.394146	0.0807414	3.97926	0.0202906	0.983812	NA	0.00178164	-0.950605
2300002M23Rik	0	0	0	0	0	0	0	NA	NA	NA	NA	NA	0	0
2300003K06Rik	0	0	0	0	0	0	0	NA	NA	NA	NA	NA	0	0
2300005B03Rik	3.71061	3.71302	3.71152	3.75265	4.00271	3.73456	15.5335	-6.37837	2.52689	-2.5242	0.0115963	0.0781668	0.114803	3.77085
2300009A05Rik	6.97517	7.20268	7.06138	7.25811	7.51489	7.21949	154.082	-0.914184	0.560978	-1.62963	0.103181	0.318125	0.185749	7.20529
2310001A20Rik	11.4781	11.7034	11.4656	11.6306	11.7078	11.7686	3175.36	-0.193664	0.193898	-0.998791	0.317896	0.589112	0.126992	11.6257
2310001H17Rik	-0.21867	-0.220693	-0.221811	-0.207668	-0.221805	-0.221819	0.806649	-0.382607	3.96616	-0.0964677	0.923149	NA	0.0055624	-0.218744
2310001H18Rik	0	0	0	0	0	0	0	NA	NA	NA	NA	NA	0	0
2310001K24Rik	1.55943	1.54792	1.54768	1.60312	1.54771	1.54765	2.98827	-0.421957	3.95512	-0.106686	0.915038	NA	0.0221533	1.55892
2310002D06Rik	-1.20279	-1.20616	-1.20699	-1.20734	-1.20687	-1.20716	0.293288	1.96573	4.03475	0.487201	0.626116	NA	0.00172629	-1.20622
2310002J15Rik	1.37529	1.37564	1.37543	1.39631	1.37545	1.41461	2.63987	-4.41885	3.92775	-1.12503	0.260574	NA	0.0165419	1.38545
2310002L09Rik	0	0	0	0	0	0	0	NA	NA	NA	NA	NA	0	0
2310002L13Rik	0.178487	0.16567	0.165205	0.165154	0.165214	0.176905	1.10628	0.87158	3.89422	0.223814	0.822902	NA	0.00641799	0.169439
2310003C23Rik	9.03719	9.92502	8.82804	9.16514	9.51624	9.13862	666.983	-0.0500459	0.375012	-0.133451	0.893836	0.953046	0.391778	9.26838
2310003F16Rik	10.8167	11.5844	11.2203	11.2534	12.3079	11.7863	3139.79	-0.72356	0.191631	-3.7758	0.000159492	0.00312864	0.519152	11.4948
2310003H01Rik	9.42376	9.32323	8.91033	8.94849	8.34574	8.90824	541.267	0.90481	0.462462	1.95651	0.0504056	0.204263	0.381561	8.97663
2310003L22Rik	7.66063	7.90644	7.638	7.79493	8.40494	7.95478	255.142	-0.803912	0.464894	-1.72924	0.0837668	0.280809	0.280969	7.89329
2310004I24Rik	8.87239	9.03728	8.87921	8.62633	9.47827	8.65565	514.316	0.0616887	0.417704	0.147685	0.882591	0.947827	0.311554	8.92485
2310004N24Rik	8.22229	8.72789	8.53691	8.60287	9.14364	8.86668	435.645	-0.759627	0.350555	-2.16693	0.0302405	0.148939	0.312397	8.68338
2310005A03Rik	-0.965528	-0.968208	-0.969303	-0.966552	-0.969141	-0.969512	0.384967	0.501003	3.98106	0.125847	0.899853	NA	0.00164491	-0.968041
2310005E17Rik	0.12737	0.1263	0.125754	0.144236	0.125763	0.129639	1.07157	-1.64035	3.951	-0.415174	0.678015	NA	0.00720045	0.129844
2310005G13Rik	-1.95198	-1.9509	-1.95139	-1.95198	-1.95132	-1.95013	0.173236	-0.582649	4.07006	-0.143155	0.886168	NA	0.000701779	-1.95128
2310007B03Rik	0.681841	0.682059	0.681924	0.681847	0.707295	0.693947	1.62986	-2.73528	3.98474	-0.686439	0.492436	NA	0.0105405	0.688152
2310007L24Rik	1.8256	1.82609	1.83505	1.82757	1.88552	1.83784	3.66512	-2.91509	3.68995	-0.790009	0.429523	NA	0.0230453	1.83961
2310008H04Rik	9.27625	8.94035	9.36615	9.23462	8.68928	9.58717	609.353	0.0587076	0.346955	0.169208	0.865633	0.941197	0.319655	9.1823
2310008H09Rik	9.88394	9.65484	9.5725	9.60123	9.65603	9.53469	809.226	0.170487	0.289283	0.589343	0.555631	0.772156	0.123667	9.65054
2310008N11Rik	1.56132	1.56171	1.58421	1.59906	1.56149	1.56945	2.99284	-0.483212	3.85786	-0.125254	0.900323	NA	0.0155799	1.57287
2310009A05Rik	7.99529	8.49185	8.09495	8.70762	9.24794	8.63199	419.067	-1.38487	0.364846	-3.79576	0.00014719	0.00292486	0.454754	8.52827
2310009B15Rik	7.63255	8.5123	7.93602	7.96154	8.55739	7.95429	302.005	-0.367626	0.457008	-0.804421	0.421154	0.678151	0.364592	8.09235
2310010J17Rik	6.10672	6.86264	6.11297	6.31981	6.63849	6.25561	98.6324	-0.920447	0.844755	-1.0896	0.275889	0.549579	0.304894	6.38271
2310010M20Rik	4.87144	4.93707	4.8683	4.84252	4.74778	4.84545	29.5087	1.57955	1.44503	1.09309	0.274353	0.54771	0.0614415	4.85209
2310011J03Rik	10.0956	10.4613	9.87646	9.80855	10.1932	9.77284	1080.12	0.326386	0.251382	1.29836	0.194163	0.454766	0.266681	10.0347
2310014F07Rik	5.5299	5.60861	5.72249	5.77302	5.78662	5.89055	55.1969	-2.14082	1.05691	-2.02555	0.042811	0.185066	0.130291	5.71853
2310014L17Rik	5.64795	5.60464	5.5523	5.64189	5.69983	5.51347	49.5451	-0.0337105	0.942398	-0.035771	0.971465	0.988585	0.0681229	5.61001
2310015A10Rik	6.386	6.5794	6.39762	6.48795	6.75087	6.36488	94.1516	-0.344919	0.712118	-0.484357	0.628133	0.819493	0.148954	6.49445
2310015B20Rik	1.19297	1.19327	1.19308	1.23778	1.1931	1.20103	2.32649	-3.29346	3.9084	-0.842662	0.399417	NA	0.0178756	1.20187
2310015D24Rik	8.66112	9.24992	8.50176	8.88389	8.66196	8.78914	461.926	0.0109293	0.476439	0.0229396	0.981698	0.993153	0.259389	8.7913
2310016D03Rik	0	0	0	0	0	0	0	NA	NA	NA	NA	NA	0	0
2310016M24Rik	10.2235	11.1229	10.4848	10.779	11.4555	11.0435	1972.46	-0.645688	0.215724	-2.99311	0.00276147	0.0276973	0.449324	10.8515
2310020H05Rik	0	0	0	0	0	0	0	NA	NA	NA	NA	NA	0	0
2310021P13Rik	10.3414	10.0061	9.93568	10.374	9.4904	9.55325	1044.3	0.443215	0.300962	1.47266	0.140842	0.380344	0.375495	9.95014
2310022A10Rik	9.17198	9.21908	8.69436	8.92035	8.80968	8.65406	497.696	0.440087	0.356957	1.23288	0.217619	0.483622	0.239303	8.91158
2310022B05Rik	10.3971	9.76647	10.2253	10.2698	10.1147	10.1896	1163.09	-0.092741	0.28026	-0.33091	0.740712	0.882591	0.214641	10.1605
2310028H24Rik	7.81937	7.01966	7.72467	7.47512	7.55	7.49229	195.463	-0.166129	0.783165	-0.212125	0.83201	0.926602	0.277592	7.51352
2310030A07Rik	0	0	0	0	0	0	0	NA	NA	NA	NA	NA	0	0
2310030G06Rik	6.06986	5.8164	5.97271	6.08585	6.34453	6.18044	72.3573	-2.22013	1.34657	-1.64872	0.0992042	0.311594	0.179543	6.0783
2310030N02Rik	7.30363	7.89249	7.55795	7.59397	7.63511	7.46226	198.503	-0.00353594	0.593189	-0.00596089	0.995244	0.998075	0.19566	7.57424
2310033E01Rik	0.893278	0.890113	0.889959	0.929134	0.889976	0.88994	1.87916	-0.737212	3.95851	-0.186235	0.852261	NA	0.0157646	0.897067
2310033P09Rik	8.44328	9.07924	8.37366	8.09633	8.30649	8.22712	373.945	0.88121	0.437157	2.01577	0.0438237	0.187966	0.344131	8.42102
2310034C09Rik	0	0	0	0	0	0	0	NA	NA	NA	NA	NA	0	0
2310034G01Rik	5.97816	6.40112	5.90164	5.99714	6.18821	5.93159	73.3863	0.107265	0.810483	0.132347	0.89471	0.953147	0.192239	6.06631
2310034O05Rik	0	0	0	0	0	0	0	NA	NA	NA	NA	NA	0	0
2310035C23Rik	10.86	10.709	10.5982	10.5095	9.79863	10.4077	1491.95	0.675814	0.297226	2.27374	0.0229819	0.125158	0.369097	10.4805
2310035K24Rik	7.4046	7.39972	7.34312	7.4306	7.78343	7.67636	188.105	-0.75501	0.553243	-1.3647	0.172348	0.426424	0.178761	7.5063
2310036O22Rik	10.3017	11.3207	10.4186	10.3812	10.804	10.407	1653.3	0.196169	0.268158	0.731543	0.464447	0.710319	0.391882	10.6055
2310037I24Rik	11.194	10.6363	11.2252	11.19	10.969	11.2545	2198.85	-0.157024	0.219521	-0.715303	0.474422	0.717647	0.23908	11.0782
2310039H08Rik	8.63135	9.67363	8.78549	9.35009	9.83179	9.43462	690.07	-0.895422	0.360802	-2.48176	0.0130737	0.0845211	0.480293	9.28449
2310039L15Rik	6.88213	6.9632	6.99167	6.86077	6.48322	6.83291	119.547	1.20533	0.838944	1.43673	0.150795	0.394668	0.183095	6.83565
2310040G24Rik	1.82871	1.82919	1.83809	1.86284	1.82892	1.86814	3.61592	-2.38227	3.86424	-0.616492	0.53757	NA	0.0181237	1.84265
2310042D19Rik	5.15431	5.01834	5.12777	5.2462	5.17707	5.19131	36.2556	-1.95816	1.44882	-1.35155	0.176518	0.432443	0.0768171	5.1525
2310042E22Rik	2.81774	2.81873	2.81812	2.82756	2.94263	2.85011	7.5712	-5.49528	3.28263	-1.67405	0.0941217	NA	0.0490162	2.84581
2310043J07Rik	3.03113	3.03226	3.03622	3.12317	3.07211	3.08648	8.52586	-5.46319	2.74115	-1.99303	0.0462587	NA	0.037232	3.06356
2310043L19Rik	0	0	0	0	0	0	0	NA	NA	NA	NA	NA	0	0
2310043O21Rik	0	0	0	0	0	0	0	NA	NA	NA	NA	NA	0	0
2310044G17Rik	9.58504	10.1493	9.3966	9.92431	9.95988	9.70763	911.863	-0.250243	0.315002	-0.794417	0.426953	0.682281	0.275495	9.78712
2310044H10Rik	11.9534	12.1232	11.8397	12.169	12.0411	11.9025	4129.66	-0.0815073	0.184388	-0.442043	0.658458	0.838842	0.128586	12.0048
2310045N01Rik	7.91622	8.33781	7.79642	7.96753	7.86399	7.88685	258.017	0.242194	0.52575	0.460665	0.645039	0.829198	0.192886	7.96147
2310046A06Rik	4.61296	4.58988	4.74128	4.63756	4.7349	4.79696	26.7547	-1.97674	1.59592	-1.23862	0.215487	0.480771	0.0832817	4.68559
2310046O06Rik	8.72449	7.65362	7.78954	8.68113	8.12805	8.18029	332.763	-0.754508	0.488389	-1.54489	0.122373	0.351362	0.442457	8.19285
2310047B19Rik	7.55267	8.96878	7.85897	8.13334	8.40456	7.40563	335.998	0.358711	0.645814	0.55544	0.578594	0.786734	0.578921	8.05399
2310047M10Rik	6.08247	6.0706	5.95722	6.05271	6.0911	6.0633	66.7601	-0.260344	0.825659	-0.315316	0.752521	0.8877	0.0488064	6.0529
2310050B05Rik	3.05293	3.28291	3.05352	3.05297	3.05363	3.0534	9.93956	1.72209	3.95936	0.434942	0.663604	NA	0.0937407	3.09156
2310050C09Rik	0	0	0	0	0	0	0	NA	NA	NA	NA	NA	0	0
2310057J18Rik	0	0	0	0	0	0	0	NA	NA	NA	NA	NA	0	0
2310057M21Rik	10.0598	9.11474	10.0507	10.1451	10.1446	10.149	1039.24	-0.619425	0.387854	-1.59706	0.110253	0.33031	0.408699	9.944
2310057N15Rik	-2.01158	-2.01162	-2.01183	-2.01208	-2.0118	-2.01187	0.073322	1.16606	4.06331	0.286973	0.774133	NA	0.000182565	-2.0118
2310061C15Rik	8.22858	8.81951	8.65777	8.28971	8.83405	8.68287	400.728	-0.0742079	0.360988	-0.205569	0.837128	0.92819	0.263107	8.58541
2310061I04Rik	5.17222	5.05703	5.18755	5.31001	5.19789	5.15907	37.131	-1.39512	1.27257	-1.0963	0.272948	0.546865	0.0811137	5.18063
2310061J03Rik	6.59654	6.46969	6.38872	6.4804	6.61479	6.41583	91.5915	-0.104386	0.737444	-0.141552	0.887434	0.95017	0.0928154	6.49433
2310061N02Rik	0	0	0	0	0	0	0	NA	NA	NA	NA	NA	0	0
2310065F04Rik	0	0	0	0	0	0	0	NA	NA	NA	NA	NA	0	0
2310067B10Rik	9.00583	9.00711	8.56842	8.51252	7.92024	8.43612	418.661	1.19294	0.519428	2.29664	0.0216394	0.119937	0.406024	8.57504
2310068J16Rik	4.44756	4.2974	4.33748	4.43195	4.37649	4.35553	21.0976	-1.40665	1.71083	-0.822203	0.410961	0.670684	0.0571251	4.3744
2310069B03Rik	8.1842	9.3703	8.40028	8.14354	8.75057	8.19713	424.885	0.541143	0.403504	1.34111	0.179885	0.43734	0.479235	8.50767
2310069G16Rik	3.8697	3.83214	3.87233	3.95928	3.83102	3.95934	15.2274	-1.1622	2.03968	-0.569793	0.568818	0.780312	0.0585067	3.8873
2310079F23Rik	6.63951	6.2084	6.7735	6.50162	6.57706	6.72059	100.93	-1.01781	1.26584	-0.804057	0.421364	0.678158	0.202188	6.57011
2310079G19Rik	0	0	0	0	0	0	0	NA	NA	NA	NA	NA	0	0
2310081J21Rik	0	0	0	0	0	0	0	NA	NA	NA	NA	NA	0	0
2400001E08Rik	10.6095	11.1071	10.6813	10.5256	10.8509	10.6906	1742.34	0.148125	0.221297	0.66935	0.503272	0.738583	0.207779	10.7442
2400003C14Rik	13.2634	13.4631	13.3937	13.234	13.5381	13.3683	10675.6	-0.00772071	0.149289	-0.0517166	0.958754	0.982915	0.115807	13.3768
2400009B08Rik	3.96226	4.1343	3.97196	3.97253	3.98543	4.00789	16.899	0.0987319	1.56335	0.063154	0.949644	0.978908	0.0649303	4.00573
2410001C21Rik	10.7876	10.9483	10.8249	10.8643	10.8231	11.0051	1883.39	-0.0597505	0.220824	-0.27058	0.786714	0.903524	0.0839658	10.8756
2410002F23Rik	12.6571	12.7455	12.6187	12.3925	11.9558	12.4833	5816.54	0.477653	0.221843	2.15311	0.0313101	0.152297	0.284065	12.4755
2410002I01Rik	7.62911	6.83051	7.50435	7.54141	6.97543	7.15777	172.466	0.115956	0.663537	0.174754	0.861273	0.938934	0.331665	7.2731
2410002O22Rik	10.6415	10.5298	10.621	10.6988	10.5699	10.8449	1614.87	-0.146981	0.221226	-0.664393	0.506439	0.740461	0.11146	10.651
2410003K15Rik	9.51015	10.4466	9.74022	10.2167	10.5637	10.2286	1180.22	-0.650489	0.293822	-2.21389	0.0268364	0.138137	0.410092	10.1177
2410003L11Rik	0	0	0	0	0	0	0	NA	NA	NA	NA	NA	0	0
2410004A20Rik	0.620096	0.620304	0.65193	0.620102	0.620189	0.624189	1.56813	1.26419	3.97533	0.318008	0.750479	NA	0.012739	0.626135
2410004B18Rik	9.59238	10.2133	9.45721	9.62466	9.89404	9.76567	894.364	-0.0210953	0.321237	-0.065669	0.947641	0.97812	0.268905	9.75787
2410004I01Rik	1.71578	1.69917	1.72614	1.71788	1.69893	1.71086	3.27356	0.629518	3.69506	0.170367	0.864721	NA	0.010807	1.71146
2410004N09Rik	6.97635	8.12147	7.09996	7.32547	7.52037	6.98953	198.682	0.188917	0.687592	0.274752	0.783507	0.901741	0.437292	7.33886
2410004P03Rik	5.93589	5.61418	6.11443	5.75046	5.66936	5.96679	62.8188	-0.116043	1.21927	-0.0951736	0.924177	0.967813	0.194264	5.84185
2410006H16Rik	8.64292	9.98855	8.6914	10.1157	10.05	8.7639	828.516	-0.833912	0.496954	-1.67805	0.0933375	0.29946	0.742612	9.37541
2410007B07Rik	0.768827	0.762243	0.762102	0.790302	0.762118	0.766074	1.70403	-1.21876	3.94396	-0.30902	0.757306	NA	0.0109731	0.768611
2410012E07Rik	-1.20279	-1.20616	-1.20699	-1.20734	-1.20687	-1.20716	0.293288	1.96573	4.03475	0.487201	0.626116	NA	0.00172629	-1.20622
2410012M07Rik	0	0	0	0	0	0	0	NA	NA	NA	NA	NA	0	0
2410015M20Rik	9.45789	10.2232	9.91078	10.2279	10.6253	10.3887	1195.52	-0.807866	0.273405	-2.95483	0.0031284	0.0302522	0.407383	10.139
2410016O06Rik	9.51882	8.69215	9.31276	9.1891	9.21782	8.97623	590.763	0.0714232	0.444276	0.160763	0.87228	0.94412	0.285821	9.15115
2410017I17Rik	-1.95198	-1.9509	-1.95139	-1.95198	-1.95132	-1.95013	0.173236	-0.582649	4.07006	-0.143155	0.886168	NA	0.000701779	-1.95128
2410017P09Rik	8.79957	9.23777	8.65268	9.09358	9.55993	9.11529	569.683	-0.654283	0.32236	-2.02967	0.0423902	0.183709	0.321816	9.07647
2410018L13Rik	8.23882	9.11478	8.16174	7.97294	7.95111	7.90534	351.904	1.18168	0.522586	2.26121	0.023746	0.127857	0.455332	8.22412
2410018M08Rik	10.444	10.9129	10.1959	10.0079	10.3486	10.2402	1363.1	0.449596	0.283501	1.58587	0.112769	0.334995	0.309226	10.3583
2410021H03Rik	2.05799	2.04823	2.07075	2.07257	2.07827	2.05589	4.18745	-1.41215	2.94527	-0.479464	0.631608	NA	0.0116047	2.06395
2410022L05Rik	6.49036	6.56608	6.71181	6.72099	6.38037	6.7057	99.9133	0.0526089	0.803225	0.0654971	0.947778	0.97812	0.141151	6.59588
2410042D21Rik	12.1025	11.917	12.055	12.0035	12.2975	11.9219	4264.61	-0.0589459	0.214939	-0.274245	0.783896	0.901963	0.141644	12.0496
2410057H14Rik	4.5256	4.48844	4.55904	4.5737	4.75171	4.59349	25.17	-2.2599	1.68463	-1.34148	0.179765	0.437281	0.091065	4.582
2410066E13Rik	9.53212	8.64469	8.94375	8.51767	8.06235	8.17129	474.397	1.54416	0.355035	4.34932	1.37e-05	0.000419156	0.53969	8.64531
2410075B13Rik	3.48278	3.39061	3.46129	3.42756	3.3898	3.43332	10.9233	1.00846	2.31885	0.434896	0.663638	NA	0.0372707	3.43089
2410076I21Rik	3.95954	4.08765	3.9425	3.92803	3.90512	3.96913	16.3994	1.89405	2.02273	0.936385	0.349075	0.618335	0.0641071	3.96533
2410088K16Rik	1.04834	1.04862	1.05761	1.07118	1.04846	1.06434	2.08149	-1.55837	3.87995	-0.401647	0.687944	NA	0.00971096	1.05643
2410089E03Rik	9.64023	7.9335	9.22703	9.30867	8.52127	9.15842	587.99	-0.23509	0.473996	-0.495974	0.619912	0.814432	0.623057	8.96485
2410091C18Rik	8.22781	7.78979	8.38849	8.20044	8.57546	8.75391	343.886	-0.864689	0.532517	-1.62378	0.104423	0.319762	0.335292	8.32265
2410114N07Rik	2.53231	2.48944	2.50729	2.53757	2.48902	2.50885	5.71465	0.142596	2.97891	0.0478686	0.961821	NA	0.0206215	2.51075
2410124H12Rik	0	0	0	0	0	0	0	NA	NA	NA	NA	NA	0	0
2410127L17Rik	11.3662	11.8783	11.3541	11.1563	11.8293	11.5717	3024.48	0.0187022	0.210668	0.0887757	0.92926	0.970108	0.28633	11.526
2410131K14Rik	8.57595	9.73928	9.70642	8.8173	9.11693	9.32093	657.521	0.397244	0.406812	0.976482	0.328826	0.600014	0.469836	9.2128
2410137F16Rik	0	0	0	0	0	0	0	NA	NA	NA	NA	NA	0	0
2410137M14Rik	0	0	0	0	0	0	0	NA	NA	NA	NA	NA	0	0
2410141K09Rik	3.17539	3.3464	3.16523	3.17277	3.16532	3.18166	10.16	0.566967	2.85199	0.198797	0.842422	NA	0.071442	3.20113
2500003M10Rik	12.3206	12.3661	12.2323	12.4951	12.3512	12.2912	5206.24	-0.0889223	0.168381	-0.528103	0.597428	0.798578	0.0885444	12.3427
2500004C02Rik	7.79071	8.04042	7.90955	7.72919	7.78302	7.93418	236.201	0.267269	0.478694	0.558329	0.576619	0.785214	0.116812	7.86451
2510002D24Rik	8.59185	8.96632	8.73129	8.42652	8.96818	8.56974	431.469	0.230702	0.35926	0.64216	0.520769	0.749853	0.222171	8.70898
2510003D18Rik	0	0	0	0	0	0	0	NA	NA	NA	NA	NA	0	0
2510003E04Rik	10.9923	10.7644	10.7127	10.6426	10.6746	10.9388	1780.34	0.0970648	0.256502	0.378417	0.705121	0.86203	0.144714	10.7876
2510006D16Rik	10.3962	10.8247	10.491	10.4672	10.8727	10.8782	1641.28	-0.230536	0.236803	-0.973535	0.330288	0.601004	0.2259	10.655
2510009E07Rik	11.1531	10.899	11.2775	11.1536	10.3353	11.1479	2111.38	0.306194	0.249768	1.22591	0.220231	0.486177	0.345757	10.9944
2510012J08Rik	9.89051	7.78631	9.26325	9.4035	8.99468	8.93754	642.535	-0.360084	0.649762	-0.554178	0.579457	0.787467	0.705609	9.04596
2510039O18Rik	11.6377	11.4545	11.2926	11.2529	11.1434	11.1616	2593.34	0.354374	0.199223	1.77878	0.0752756	0.262987	0.18997	11.3238
2510049J12Rik	0.879901	0.877512	0.877207	0.871778	0.868004	0.876011	1.83742	1.76387	3.86197	0.456729	0.647866	NA	0.00437087	0.875069
2600006L11Rik	-1.49338	-1.49337	-1.49408	-1.49461	-1.49397	-1.49228	0.246558	0.288915	4.07141	0.0709619	0.943428	NA	0.000801279	-1.49361
2610001J05Rik	10.2627	10.1341	10.3901	10.6397	10.9878	10.9043	1567.31	-0.800744	0.254073	-3.15162	0.00162365	0.0185902	0.348207	10.5531
2610002D18Rik	6.0032	5.82904	6.09273	6.18751	6.15173	6.26629	71.4346	-2.2758	1.22769	-1.85372	0.0637787	0.236942	0.154936	6.08842
2610002I17Rik	7.63476	7.81849	7.46799	7.83179	7.98238	7.75894	221.39	-0.64062	0.48224	-1.32843	0.184037	0.44177	0.177914	7.74906
2610002J02Rik	9.34339	10.2761	9.77851	9.49397	9.63978	9.65563	871.144	0.301525	0.349224	0.863417	0.387908	0.65128	0.320405	9.6979
2610002M06Rik	8.77434	7.81067	8.59771	9.06484	9.01767	8.75978	449.726	-1.17781	0.573698	-2.05301	0.0400714	0.177636	0.455935	8.67083
2610005L07Rik	11.0031	11.1604	10.9996	10.9704	10.8966	11.2619	2131.36	0.0150691	0.238756	0.0631151	0.949675	0.978908	0.135393	11.0487
2610008E11Rik	9.92738	9.65523	9.77329	10.6796	10.245	10.1584	1138	-0.847925	0.262374	-3.23174	0.0012304	0.0153812	0.371575	10.0731
2610015P09Rik	6.91505	7.20441	7.3772	7.27426	7.40752	7.47539	161.984	-0.888816	0.608001	-1.46187	0.143778	0.384798	0.201347	7.27564
2610016A17Rik	0	0	0	0	0	0	0	NA	NA	NA	NA	NA	0	0
2610017I09Rik	5.6092	6.25976	5.72422	5.58888	5.84759	5.68912	65.4465	0.839051	0.86131	0.974156	0.329979	0.60076	0.249621	5.78646
2610018G03Rik	12.4368	12.2396	12.6908	12.4043	12.5923	12.9102	6075.43	-0.215855	0.183723	-1.17489	0.240037	0.510556	0.23734	12.5457
2610019E17Rik	5.80746	6.24817	5.81506	5.90958	6.03355	5.81214	66.5902	-0.00663243	0.879215	-0.00754358	0.993981	0.997872	0.175577	5.93766
2610019F03Rik	6.94363	7.63175	7.19383	7.05051	7.35096	7.17728	161.067	0.0969981	0.595079	0.163	0.870518	0.943534	0.242559	7.22466
2610020C07Rik	5.6007	5.36802	5.53207	5.5848	5.55893	5.53968	47.0444	-1.07749	1.22873	-0.876916	0.380532	0.64466	0.0838712	5.5307
2610020H08Rik	6.85811	6.80132	7.13465	6.7341	6.80909	6.86975	120.359	0.50738	0.644604	0.78712	0.431212	0.685856	0.139317	6.86784
2610021K21Rik	5.84374	6.26327	5.82597	5.763	5.94332	5.92968	66.4269	0.570934	0.920415	0.6203	0.53506	0.759188	0.177415	5.92816
2610027L16Rik	10.6601	10.6244	10.5454	10.632	10.0953	10.4179	1466.29	0.318762	0.264598	1.2047	0.228318	0.496273	0.214956	10.4959
2610028E06Rik	-0.0565661	-0.0572478	-0.058157	-0.0508756	-0.0581491	-0.0467709	0.923034	-1.84639	3.95266	-0.467127	0.640409	NA	0.00471774	-0.0546277
2610028H24Rik	0.169441	0.169961	0.183029	0.169445	0.169507	0.181295	1.11752	0.304891	3.97502	0.0767018	0.938861	NA	0.00651902	0.17378
2610029G23Rik	11.7164	12.5332	12.0932	11.8591	12.5622	12.3257	4810.26	-0.164837	0.171462	-0.961363	0.336369	0.606846	0.351431	12.1816
2610029I01Rik	7.24323	7.57088	7.50316	7.51705	7.66608	7.84473	196.026	-0.756907	0.520648	-1.45378	0.146008	0.388082	0.198907	7.55752
2610034B18Rik	9.90888	10.417	10.1615	10.1782	10.5096	10.3195	1238.03	-0.252449	0.241082	-1.04715	0.295031	0.567487	0.21424	10.2491
2610034M16Rik	0	0	0	0	0	0	0	NA	NA	NA	NA	NA	0	0
2610035D17Rik	9.31121	10.0235	9.47088	9.54976	9.72669	9.64755	809.712	-0.0760937	0.325648	-0.233668	0.815242	0.919036	0.243904	9.6216
2610035F20Rik	0	0	0	0	0	0	0	NA	NA	NA	NA	NA	0	0
2610037D02Rik	4.16194	4.23652	4.1467	4.1628	4.19523	4.16943	18.3483	-0.0315112	1.38788	-0.0227045	0.981886	0.993153	0.0324372	4.17877
2610039C10Rik	9.28472	9.16542	10.2031	9.83546	10.1295	10.5229	1032.72	-0.935181	0.319191	-2.92985	0.0033913	0.0321259	0.537362	9.85687
2610044O15Rik	8.50942	8.63017	8.29771	8.33492	8.25183	8.26933	339.421	0.425862	0.416614	1.0222	0.306688	0.578054	0.15283	8.38223
2610100L16Rik	0	0	0	0	0	0	0	NA	NA	NA	NA	NA	0	0
2610101N10Rik	12.4319	11.7613	12.3297	12.2855	12.3646	12.4373	5016.72	-0.228527	0.235004	-0.972438	0.330833	0.601485	0.255232	12.2684
2610109H07Rik	0.853136	0.859318	0.859014	0.849682	0.849784	0.869751	1.82551	2.09181	3.91888	0.533779	0.593495	NA	0.00764574	0.856781
2610203C20Rik	11.5767	11.9704	11.6292	11.9434	11.6417	11.5378	3403.11	0.0219461	0.240297	0.0913291	0.927231	0.96915	0.190104	11.7165
2610203C22Rik	3.60543	3.5897	3.62553	3.65802	3.66844	3.67041	12.5704	-2.67929	1.98339	-1.35086	0.176741	NA	0.0343752	3.63625
2610204G22Rik	2.64794	2.60497	2.65395	2.6291	2.60451	2.62834	6.21027	0.938014	2.87824	0.325899	0.744501	NA	0.0207585	2.62813
2610206C17Rik	5.07327	5.24961	5.00842	5.0256	5.04162	5.03612	35.0955	0.66613	1.13404	0.587396	0.556938	0.772801	0.0893892	5.07244
2610301B20Rik	9.91985	9.64428	10.3419	10.186	10.6729	10.844	1325.93	-0.851376	0.309803	-2.74812	0.00599373	0.0492647	0.451234	10.2681
2610301G19Rik	10.0232	9.18311	9.44024	9.51794	9.30278	9.5485	754.599	0.136594	0.353793	0.386085	0.699434	0.859975	0.289579	9.50263
2610305D13Rik	6.63182	6.67636	6.77285	6.71369	6.4844	6.90118	106.989	0.0890084	0.740272	0.120237	0.904295	0.958009	0.139709	6.69672
2610306M01Rik	7.32078	7.92062	7.45144	7.56674	7.65049	7.47917	198.349	-0.0846908	0.572771	-0.147862	0.882452	0.947827	0.206729	7.56487
2610307P16Rik	2.26138	2.2298	2.27884	2.22917	2.22944	2.25719	4.79774	2.44018	3.86588	0.631208	0.527904	NA	0.0211871	2.24764
2610316D01Rik	0.0495762	0.047017	0.0463012	0.0462556	0.0463099	0.0655108	1.01283	0.532531	3.9373	0.135253	0.892412	NA	0.00762658	0.0501618
2610318N02Rik	0.386667	0.38684	0.386732	0.416744	0.386744	0.386719	1.32001	-1.13946	3.96434	-0.287428	0.773784	NA	0.0122489	0.391741
2610507B11Rik	12.6127	11.3021	12.5136	12.5976	11.5892	12.5847	5133.92	-0.140566	0.180693	-0.777929	0.436611	0.690616	0.592283	12.2
2610507I01Rik	6.54417	6.50838	6.54356	6.45678	6.39003	6.53356	90.8669	0.404301	0.708688	0.570491	0.568345	0.779893	0.0615028	6.49608
2610524H06Rik	9.49993	10.9565	9.94925	9.63947	10.4382	10.3516	1263.22	-0.0287442	0.333035	-0.0863097	0.93122	0.971269	0.54716	10.1392
2610528A11Rik	-1.23013	-1.22844	-1.22338	-1.23013	-1.2294	-1.22979	0.39854	1.59201	4.04776	0.393307	0.694093	NA	0.00260858	-1.22854
2610528E23Rik	8.25878	8.59498	8.39264	8.45961	9.05235	8.59078	396.378	-0.582322	0.376388	-1.54713	0.121831	0.350805	0.273267	8.55819
2610528J11Rik	-1.20279	-1.20616	-1.20699	-1.20734	-1.20687	-1.20716	0.293288	1.96573	4.03475	0.487201	0.626116	NA	0.00172629	-1.20622
2700007P21Rik	10.779	10.5171	10.5508	11.0802	11.2537	10.8534	1884.35	-0.596664	0.242874	-2.45668	0.0140228	0.0888306	0.290056	10.839
2700023E23Rik	7.2192	8.396	7.42758	7.43824	7.66671	7.26229	229.73	0.466239	0.624199	0.746939	0.4551	0.704604	0.435203	7.56834
2700029M09Rik	9.77745	10.3626	10.0111	10.0116	10.5438	10.5253	1225.43	-0.448249	0.255764	-1.75259	0.0796729	0.272425	0.316241	10.2053
2700038G22Rik	8.82441	9.23056	8.6455	8.81425	9.37238	8.52662	510.51	0.0109424	0.343113	0.0318916	0.974559	0.990404	0.331552	8.90229
2700046A07Rik	-0.421241	-0.41989	-0.421209	-0.421239	-0.421204	-0.406687	0.692945	-1.17386	4.01144	-0.292629	0.769806	NA	0.00584993	-0.418578
2700046G09Rik	4.97116	5.03069	4.98362	5.0307	5.04916	5.0171	32.4799	-0.508664	1.09226	-0.4657	0.64143	0.827251	0.0302011	5.01374
2700049A03Rik	7.80644	8.13266	8.23971	7.99909	7.68748	8.14929	266.02	0.295171	0.541222	0.545378	0.585493	0.791008	0.215614	8.00244
2700050L05Rik	10.7926	10.2388	10.3048	10.261	9.57554	10.1513	1259.69	0.650096	0.277831	2.3399	0.019289	0.11112	0.389143	10.2207
2700054A10Rik	5.2482	4.99401	5.05212	5.13207	5.06894	5.23774	36.2892	-1.87631	1.48741	-1.26146	0.207142	0.471123	0.103444	5.12218
2700060E02Rik	11.2874	11.8837	11.6669	12.4395	12.8112	12.4011	4737.1	-1.14678	0.194073	-5.90904	3.44e-09	2.89e-07	0.566452	12.0816
2700062C07Rik	8.98256	8.99609	9.20618	9.10043	9.58003	9.32619	603.57	-0.473911	0.354099	-1.33836	0.18078	0.438601	0.227662	9.19858
2700069I18Rik	2.60878	2.58224	2.62263	2.58339	2.63198	2.60175	6.13557	0.548055	2.73927	0.200073	0.841423	NA	0.0202423	2.60513
2700070H01Rik	5.35721	5.65249	5.31983	5.34163	5.38543	5.33323	45.0484	0.559879	1.01973	0.549049	0.582972	0.789638	0.126545	5.3983
2700078E11Rik	10.438	10.2097	10.3205	10.2614	9.97411	9.72818	1168.45	0.492061	0.273143	1.80148	0.0716278	0.254642	0.259496	10.1553
2700081L22Rik	3.04993	3.20873	3.04328	3.06462	3.04336	3.04735	9.24285	-0.307599	2.93259	-0.10489	0.916463	NA	0.0653946	3.07621
2700081O15Rik	7.43358	6.98204	7.0425	7.35966	7.18663	7.1539	151.746	-0.390114	0.604313	-0.645549	0.518571	0.748119	0.175714	7.19305
2700086A05Rik	3.17181	3.15743	3.21106	3.19277	3.24067	3.17678	9.25936	-1.52765	2.30572	-0.662549	0.50762	NA	0.0302197	3.19175
2700089E24Rik	12.9935	12.7397	13.0622	12.8787	13.1935	12.9711	8093.8	-0.0967343	0.207922	-0.465242	0.641758	0.827301	0.155102	12.9731
2700089I24Rik	1.48987	1.47827	1.48723	1.49136	1.48828	1.4979	2.79954	-1.26545	3.27298	-0.386636	0.699025	NA	0.00638834	1.48882
2700090O03Rik	0.417471	0.402446	0.402337	0.417464	0.402349	0.402323	1.3199	0.346165	3.95964	0.0874234	0.930335	NA	0.00779969	0.407398
2700094K13Rik	7.89655	8.89563	8.54852	8.63301	8.81096	8.8864	421.705	-0.757277	0.495358	-1.52875	0.126327	0.357286	0.377271	8.61185
2700097O09Rik	7.90634	8.10179	7.97706	7.98431	8.05369	8.17292	264.017	-0.1957	0.449126	-0.435734	0.66303	0.840313	0.0962042	8.03269
2700099C18Rik	6.67927	6.3742	6.81921	6.81488	7.05154	7.13128	123.614	-2.25266	1.18441	-1.90192	0.0571814	0.220995	0.271539	6.81173
2810001G20Rik	8.75691	9.29405	8.95201	9.22219	9.54061	9.48541	618.41	-0.735153	0.322669	-2.27835	0.022706	0.124147	0.304696	9.20853
2810002D19Rik	7.57979	7.35694	7.54624	7.55589	7.7687	7.77928	198.306	-0.633877	0.562256	-1.12738	0.259581	0.531851	0.158046	7.59781
2810002N01Rik	8.77846	9.22079	9.27813	9.20668	9.69789	9.4934	650.002	-0.646615	0.312529	-2.06898	0.0385483	0.173228	0.31003	9.27923
2810004N23Rik	9.72045	9.08574	9.47686	9.84922	10.1346	9.91661	875.615	-0.850064	0.378679	-2.24481	0.0247801	0.131615	0.370274	9.69724
2810006K23Rik	7.98504	7.91318	7.87349	8.0509	8.02398	8.30831	265.73	-0.511711	0.473649	-1.08036	0.279982	0.554841	0.153614	8.02582
2810007J24Rik	0	0	0	0	0	0	0	NA	NA	NA	NA	NA	0	0
2810008D09Rik	8.1432	8.90975	8.3013	8.3091	8.57204	8.06495	357.912	0.278431	0.441052	0.631289	0.527851	0.754765	0.311128	8.38339
2810008M24Rik	10.2924	10.3308	10.2788	10.9342	11.2184	10.8377	1697.85	-0.946939	0.229936	-4.11827	3.82e-05	0.000957871	0.401661	10.6487
2810011L19Rik	3.10922	3.05188	3.06503	3.14075	3.05125	3.08291	8.5925	-0.451564	2.56104	-0.176321	0.860042	NA	0.0355532	3.08351
2810013P06Rik	9.34773	9.53897	9.25253	9.37298	9.58972	9.51645	698.565	-0.190241	0.301359	-0.631279	0.527858	0.754765	0.131246	9.4364
2810021B07Rik	10.1494	9.84629	10.1816	10.0232	10.364	10.229	1135.64	-0.211979	0.304281	-0.696656	0.486018	0.725571	0.178571	10.1323
2810021J22Rik	6.81762	7.59286	6.83844	7.10479	7.02559	7.00052	149.105	-0.164046	0.774078	-0.211925	0.832166	0.926602	0.282291	7.0633
2810025M15Rik	8.27999	9.07733	8.17911	8.35103	8.65302	8.3745	386.988	0.0568467	0.44276	0.128392	0.897839	0.954617	0.330102	8.48583
2810029C07Rik	9.54687	9.44381	10.3925	9.1326	9.8872	10.5116	1017.27	-0.0608543	0.351655	-0.173051	0.862611	0.939472	0.547577	9.81909
2810030E01Rik	4.36855	5.08016	4.34922	4.34672	4.3497	4.36152	33.6508	4.95581	2.44168	2.02967	0.0423902	0.183709	0.296105	4.47598
2810032G03Rik	6.58947	6.52341	6.70086	6.38582	6.32164	6.56451	94.5924	1.01797	0.708654	1.43648	0.150866	0.394779	0.139056	6.51428
2810046L04Rik	9.26491	9.11349	8.77647	8.58963	8.88057	8.73409	492.983	0.598045	0.405388	1.47524	0.140148	0.379318	0.252172	8.89319
2810047C21Rik1	6.79494	7.60472	6.84988	6.7375	6.84731	6.73637	143.598	0.992177	0.687457	1.44326	0.148949	0.391723	0.335048	6.92845
2810049E08Rik	0	0	0	0	0	0	0	NA	NA	NA	NA	NA	0	0
2810055F11Rik	8.39235	8.94745	8.63607	8.86407	8.86939	9.14381	465.83	-0.605638	0.41775	-1.44976	0.147125	0.389135	0.261322	8.80885
2810055G20Rik	8.63526	8.25885	8.61557	8.44657	8.19088	8.64647	362.447	0.166072	0.38983	0.426011	0.6701	0.844226	0.201279	8.4656
2810403A07Rik	12.5144	12.343	12.5685	12.1579	11.9353	12.0777	5015.03	0.508929	0.165946	3.06683	0.0021634	0.022977	0.251256	12.2661
2810403D21Rik	5.78231	5.63856	5.55014	5.72042	5.67978	5.75317	52.4932	-0.732578	1.02436	-0.715157	0.474512	0.717647	0.0845062	5.6874
2810404M03Rik	0	0	0	0	0	0	0	NA	NA	NA	NA	NA	0	0
2810405F15Rik	0	0	0	0	0	0	0	NA	NA	NA	NA	NA	0	0
2810405K02Rik	7.50776	7.88588	7.7707	8.32209	8.67919	8.79074	340.516	-2.05132	0.407315	-5.03621	4.75e-07	2.36e-05	0.518801	8.15939
2810407C02Rik	9.05562	10.6904	9.63222	10.4101	11.128	9.87971	1364.16	-0.974839	0.375771	-2.59424	0.00948004	0.0681443	0.755393	10.1327
2810408A11Rik	4.99877	4.94023	5.17264	5.06982	5.08175	5.11947	34.4105	-1.69226	1.51369	-1.11797	0.263581	0.536487	0.083428	5.06378
2810408I11Rik	5.81182	6.30609	5.88036	6.15328	5.84224	5.93513	69.9196	-0.214063	1.15435	-0.18544	0.852884	0.935322	0.197568	5.98815
2810408M09Rik	9.4672	9.65651	9.20404	9.12039	9.26432	9.25706	655.749	0.388416	0.337109	1.1522	0.24924	0.521262	0.197407	9.32825
2810410L24Rik	4.35772	4.35002	4.36712	4.58166	4.51988	4.40446	22.958	-4.22358	1.6897	-2.4996	0.0124333	0.0816451	0.0972679	4.43014
2810417H13Rik	9.15588	8.55169	10.2772	9.71498	10.003	10.6466	1037.6	-1.23813	0.415994	-2.97631	0.00291736	0.0288609	0.765811	9.72491
2810422J05Rik	8.81083	9.3233	9.02234	9.10706	9.4826	8.93584	572.677	-0.221031	0.342544	-0.645263	0.518757	0.748209	0.24971	9.11366
2810422O20Rik	5.97872	6.06291	5.90394	6.11774	6.04352	6.05037	66.06	-0.690638	0.848989	-0.813482	0.415942	0.674085	0.0745817	6.0262
2810428I15Rik	8.90783	10.0219	9.0542	9.40098	9.62519	9.62233	748.622	-0.407929	0.416784	-0.978753	0.327702	0.599	0.409803	9.43874
2810429I04Rik	1.00352	1.0038	1.02198	1.00353	1.02401	1.01166	2.03168	-0.967739	3.92256	-0.246711	0.805132	NA	0.00951659	1.01142
2810432D09Rik	7.69989	8.22034	7.48311	7.80744	7.82119	7.59759	232.407	0.0780995	0.539448	0.144777	0.884887	0.948711	0.254465	7.77159
2810432L12Rik	9.44432	9.17555	9.60116	9.66272	9.32518	9.7155	731.635	-0.268273	0.285577	-0.939406	0.347523	0.617175	0.210299	9.4874
2810433D01Rik	5.04801	4.93258	5.08062	5.14217	5.0507	5.07676	33.7928	-1.66133	1.48397	-1.11952	0.26292	0.535854	0.0689675	5.05514
2810442I21Rik	5.46882	6.61471	5.67279	5.48487	5.51501	5.6054	81.3932	1.39929	1.13555	1.23226	0.21785	0.483796	0.441807	5.72693
2810442N19Rik	1.16713	1.16744	1.19003	1.18059	1.16727	1.18319	2.2668	-0.877006	3.87205	-0.226497	0.820815	NA	0.00997641	1.17594
2810453I06Rik	8.33278	8.52139	8.27739	8.45691	8.8577	8.28337	363.242	-0.31845	0.39882	-0.798481	0.424591	0.680252	0.220234	8.45492
2810454H06Rik	5.2031	5.12291	5.17194	5.32182	5.43953	5.3269	40.539	-2.9851	1.42001	-2.10216	0.0355391	0.165287	0.118489	5.26436
2810459M11Rik	5.86031	6.45904	6.02045	5.74491	5.66009	5.86524	74.0811	2.65599	1.43285	1.85365	0.0637897	0.236942	0.284281	5.93501
2810468N07Rik	7.45946	8.11618	7.8538	7.60609	7.78374	7.69155	226.43	0.254724	0.532357	0.478483	0.632307	0.822908	0.22562	7.75181
2810471M01Rik	0.274419	0.272975	0.277343	0.28226	0.272783	0.284653	1.2048	-1.03406	3.90122	-0.26506	0.790964	NA	0.00502003	0.277406
2810474O19Rik	11.5332	11.5841	12.1794	12.3563	12.5454	12.5614	4735.99	-0.8837	0.217084	-4.07078	4.69e-05	0.00113239	0.461836	12.1266
2900002K06Rik	5.29827	5.4745	5.43743	5.37043	5.46524	5.37106	43.1666	-0.16054	1.0272	-0.156288	0.875806	0.944936	0.0681469	5.40282
2900005J15Rik	7.33715	7.18239	7.13969	6.96134	6.93346	6.94215	140.455	1.05198	0.583872	1.80173	0.0715881	0.254632	0.164125	7.0827
2900006K08Rik	4.08619	4.03368	4.04167	4.1235	4.10793	4.19214	17.567	-3.46144	1.84777	-1.87331	0.0610255	0.23016	0.0584099	4.09752
2900008C10Rik	2.9785	2.96742	2.99895	2.96833	3.06909	3.00266	8.21242	-0.644137	2.50679	-0.256957	0.797212	NA	0.0381332	2.99749
2900009J06Rik	0.534497	0.53469	0.539155	0.555401	0.534583	0.54253	1.45325	-1.566	3.9079	-0.400726	0.688622	NA	0.00814859	0.540143
2900010M23Rik	9.32128	10.1636	9.7044	10.107	11.025	10.5567	1294.57	-1.19611	0.230132	-5.19751	2.02e-07	1.09e-05	0.603055	10.1463
2900011O08Rik	-0.735394	-0.73388	-0.73535	-0.735392	-0.735133	-0.724819	0.519709	-1.12718	4.02784	-0.279847	0.779595	NA	0.00420923	-0.733328
2900026A02Rik	8.79299	8.52341	8.61847	8.55259	8.24994	8.77378	393.091	0.266399	0.415079	0.641803	0.521001	0.750022	0.198556	8.5852
2900041M22Rik	3.57667	3.57861	3.61685	3.57673	3.77444	3.64475	13.2472	-2.16077	2.78792	-0.77505	0.43831	0.69199	0.0768791	3.62801
2900052N01Rik	0	0	0	0	0	0	0	NA	NA	NA	NA	NA	0	0
2900053A13Rik	7.74953	7.80828	8.0453	8.22859	8.75594	8.20457	310.142	-1.24506	0.518585	-2.40088	0.0163557	0.0992092	0.364004	8.13203
2900055J20Rik	0.244141	0.244466	0.2442	0.259277	0.24421	0.25602	1.17971	-3.39923	3.94895	-0.860794	0.389351	NA	0.00699397	0.248719
2900056M20Rik	8.48123	8.22944	8.81262	8.62315	8.17628	8.28398	360.53	0.308908	0.46694	0.661557	0.508255	0.741275	0.249852	8.43445
2900057B20Rik	1.26904	1.24403	1.24383	1.24949	1.24385	1.26752	2.38675	-0.151756	3.86545	-0.0392596	0.968683	NA	0.01207	1.25296
2900060B14Rik	3.78563	3.87506	3.80671	3.83669	3.81545	3.85287	14.4273	-0.855705	1.64397	-0.520512	0.602707	0.802175	0.0325908	3.82873
2900064A13Rik	11.7177	12.2446	12.1418	12.2973	12.7328	12.4541	5079.64	-0.559852	0.176111	-3.17898	0.00147794	0.0174298	0.337855	12.2647
2900076A07Rik	7.16876	7.28578	7.22285	7.47175	8.019	7.57454	195.207	-1.40858	0.535569	-2.63005	0.00853711	0.0634561	0.31531	7.45712
2900079G21Rik	0	0	0	0	0	0	0	NA	NA	NA	NA	NA	0	0
2900092C05Rik	-1.95219	-1.95095	-1.94996	-1.95219	-1.95143	-1.95163	0.19927	1.18861	4.06753	0.292218	0.77012	NA	0.000847694	-1.95139
2900092D14Rik	4.54719	4.50967	4.58584	4.48099	4.46479	4.53522	23.2457	1.07383	1.26509	0.848817	0.395983	0.657867	0.044676	4.52062
2900092E17Rik	7.39784	7.22293	7.5809	7.23997	7.53981	7.61313	178.117	-0.194685	0.608887	-0.319738	0.749167	0.88554	0.172253	7.43243
2900093L17Rik	0	0	0	0	0	0	0	NA	NA	NA	NA	NA	0	0
2900097C17Rik	14.8867	13.1478	14.4076	14.1748	13.4429	13.9546	18217.6	0.336132	0.248111	1.35477	0.175492	0.431206	0.635873	14.0024
3000002C10Rik	4.82768	4.84523	4.76176	4.87263	4.83965	4.84524	28.6836	-0.730809	1.19819	-0.609926	0.541911	0.763026	0.037447	4.83203
3010001F23Rik	3.78386	3.74113	3.8079	3.79852	3.83868	3.78782	13.9724	-1.33563	1.99384	-0.66988	0.502934	0.738478	0.0320621	3.79298
3010026O09Rik	7.62129	7.59219	7.6085	7.61315	7.42565	7.51878	190.214	0.281001	0.515533	0.545069	0.585706	0.791008	0.0770131	7.56326
3100003L05Rik	1.09696	1.09725	1.09707	1.09696	1.14708	1.09704	2.22031	-1.55077	3.99497	-0.388181	0.697882	NA	0.0204212	1.10539
3110001D03Rik	8.58833	9.77251	8.86736	9.42167	9.96978	9.10333	709.978	-0.731626	0.374966	-1.95118	0.0510355	0.20559	0.532546	9.28716
3110001I22Rik	8.33317	7.93093	8.17205	8.09234	8.46423	8.14643	299.698	-0.212623	0.542446	-0.391971	0.695079	0.857413	0.186854	8.18986
3110002H16Rik	10.3613	10.3808	10.4135	10.1763	10.4452	10.3432	1312.51	0.0928332	0.239873	0.387009	0.698749	0.859591	0.0941414	10.3534
3110003A17Rik	8.75278	9.88491	8.74778	9.55468	10.0901	9.19971	762.303	-0.826222	0.345153	-2.39379	0.0166755	0.100572	0.568322	9.37167
3110007F17Rik	3.89914	3.87854	3.93222	3.95412	3.97628	3.97417	15.4985	-2.47765	1.85536	-1.33541	0.181744	0.438988	0.0402056	3.93574
3110009E18Rik	5.67202	5.96678	5.68264	5.73191	5.59556	5.77089	56.1599	0.435946	1.1123	0.391932	0.695108	0.857413	0.127402	5.73663
3110009F21Rik	7.28472	7.20129	6.77844	6.93794	7.03326	6.79151	136.134	0.569734	0.633882	0.898802	0.368758	0.635358	0.209271	7.00452
3110015C05Rik	-0.592445	-0.594031	-0.591398	-0.590403	-0.595397	-0.595407	0.593416	0.984239	3.9683	0.248025	0.804115	NA	0.002099	-0.59318
3110021A11Rik	4.80069	4.64493	4.73384	4.76675	4.78506	4.7338	27.1218	-1.18333	1.65722	-0.714045	0.475199	0.717915	0.055567	4.74418
3110021N24Rik	7.20599	7.24332	7.15596	7.09665	7.25491	7.09296	145.529	0.214201	0.572006	0.374474	0.708052	0.863863	0.0710573	7.17497
3110035E14Rik	2.26001	2.26066	2.27405	2.30712	2.2603	2.31101	4.9124	-2.24932	3.85446	-0.583562	0.559515	NA	0.02403	2.27886
3110039I08Rik	1.82918	1.82967	1.82936	1.82919	1.91266	1.82933	3.77452	-1.6093	3.97856	-0.404492	0.685851	NA	0.0340152	1.84323
3110039M20Rik	0	0	0	0	0	0	0	NA	NA	NA	NA	NA	0	0
3110040N11Rik	8.02568	7.86538	8.0702	8.24176	8.35691	8.49321	300.515	-0.906807	0.435977	-2.07994	0.0375309	0.171117	0.231495	8.17552
3110043O21Rik	10.6521	8.84803	10.3468	10.0749	10.468	10.5997	1304.34	-0.642373	0.538715	-1.19242	0.233097	0.502667	0.677282	10.1649
3110045C21Rik	7.04312	7.35751	7.40431	7.31981	7.53652	7.32275	165.849	-0.484513	0.600557	-0.806772	0.419798	0.677171	0.1621	7.33067
3110047P20Rik	-0.600733	-0.611053	-0.612406	-0.612429	-0.612401	-0.612411	0.586576	2.10217	4.0002	0.525516	0.599225	NA	0.00468857	-0.610239
3110052M02Rik	7.94618	8.52241	8.0548	7.84623	8.24198	8.22542	295.602	0.1606	0.45874	0.350089	0.726272	0.874975	0.242923	8.1395
3110056K07Rik	7.05587	7.81973	7.23153	7.25124	7.28684	7.24268	173.247	0.191683	0.667584	0.287129	0.774013	0.899007	0.26037	7.31465
3110056O03Rik	10.6991	9.87161	10.5393	10.646	10.1976	10.7359	1451.31	-0.222728	0.248622	-0.895848	0.370334	0.636716	0.343035	10.4482
3110057O12Rik	6.54771	6.33766	6.59776	6.42572	6.42739	6.49216	90.0707	0.173491	0.751037	0.231002	0.817313	0.9192	0.0939482	6.4714
3110062M04Rik	6.06197	6.09011	5.93548	6.0941	6.368	6.01501	71.9532	-0.790263	0.806578	-0.979772	0.327199	0.598622	0.146619	6.09411
3110070M22Rik	3.2227	3.18973	3.24764	3.20985	3.21971	3.25913	9.4149	-0.965896	2.18966	-0.441118	0.659128	NA	0.0252328	3.22479
3110079O15Rik	13.3619	14.8184	13.6415	14.753	15.2147	14.449	24042.6	-1.00383	0.241519	-4.15633	3.23e-05	0.000837485	0.723104	14.3731
3110082D06Rik	0.596709	0.578287	0.578163	0.578093	0.578176	0.594013	1.49949	0.879155	3.87859	0.226669	0.820681	NA	0.00891337	0.583907
3110082I17Rik	9.52867	9.71175	9.4406	9.42425	9.69557	9.75588	779.722	-0.102798	0.310467	-0.331107	0.740564	0.882528	0.146282	9.59279
3110082J24Rik	0	0	0	0	0	0	0	NA	NA	NA	NA	NA	0	0
3110099E03Rik	-1.59582	-1.59501	-1.59548	-1.594	-1.59541	-1.59557	0.165001	-0.935355	4.03964	-0.231544	0.816892	NA	0.000651238	-1.59522
3200001D21Rik	1.28277	1.28138	1.30844	1.29261	1.28119	1.29712	2.45689	-0.262722	3.86543	-0.067967	0.945812	NA	0.0109517	1.29058
3200002M19Rik	9.00041	9.60897	9.30043	9.33776	9.82612	9.63791	728.598	-0.497281	0.289015	-1.72061	0.0853223	0.283878	0.296354	9.45193
3230401D17Rik	12.142	12.5667	12.2455	11.7521	12.5711	12.2575	5017.04	0.153153	0.196752	0.778408	0.436329	0.690616	0.304247	12.2558
3300002I08Rik	1.73789	1.72637	1.7307	1.74695	1.72612	1.7653	3.3524	-1.00306	3.71277	-0.270166	0.787032	NA	0.0151706	1.73889
3300005D01Rik	7.35247	8.24208	7.45431	7.566	7.67573	7.41274	219.47	0.244078	0.599655	0.40703	0.683986	0.851407	0.327091	7.61722
3425401B19Rik	4.84074	4.71171	4.8093	4.89026	4.7149	4.9282	29.1985	-0.996694	1.4247	-0.69958	0.48419	0.724169	0.0892846	4.81585
3632451O06Rik	12.0233	10.9867	11.9855	11.8754	11.8892	12.4248	3951.89	-0.495925	0.282883	-1.75311	0.079583	0.272293	0.474333	11.8641
3632454L22Rik	1.04178	1.04799	1.04767	1.04028	1.03845	1.06233	2.08125	1.07677	3.77863	0.284962	0.775673	NA	0.00871925	1.04642
3830403N18Rik	7.41543	7.32931	7.84176	7.8195	8.15309	8.01606	236.864	-1.36529	0.589171	-2.31731	0.0204871	0.11579	0.326954	7.76253
3830406C13Rik	9.77211	9.71925	9.82731	10.0882	10.3958	10.2375	1060.46	-0.696102	0.270347	-2.57485	0.0100285	0.0707915	0.276097	10.0067
3830408C21Rik	4.8884	4.68706	4.86547	4.77894	4.75193	4.76461	28.3774	-0.101698	1.62075	-0.0627472	0.949968	0.978908	0.0750842	4.7894
3830417A13Rik	0	0	0	0	0	0	0	NA	NA	NA	NA	NA	0	0
3830431G21Rik	4.15049	4.15305	4.27484	4.29442	4.25584	4.2075	19.1851	-5.3416	2.37536	-2.24875	0.0245282	0.130681	0.0620606	4.22269
3930402G23Rik	3.839	3.75448	3.78563	3.86114	3.75343	3.84597	14.2328	-0.519092	2.10908	-0.246123	0.805587	0.91304	0.0480791	3.80661
4430402I18Rik	4.97672	4.9565	5.10144	5.17301	4.96631	5.18683	34.9949	-1.36974	1.19295	-1.14819	0.250889	0.523119	0.10677	5.06014
4632411B12Rik	11.9637	10.9253	11.8375	11.7885	11.3425	11.4365	3127.98	0.0653957	0.263227	0.248438	0.803795	0.912389	0.38907	11.549
4632415K11Rik	7.45699	6.64857	7.25992	7.40772	7.02274	7.35937	160.387	-1.23273	0.940916	-1.31014	0.190148	0.449187	0.307686	7.19255
4632415L05Rik	8.32051	8.168	8.39139	8.37363	8.628	8.26754	333.689	-0.282477	0.467113	-0.604729	0.545359	0.764837	0.154886	8.35818
4632427E13Rik	7.85483	7.49307	7.73439	7.57202	7.83668	7.94462	219.425	-0.268581	0.593387	-0.452624	0.65082	0.833222	0.175285	7.73927
4632428C04Rik	4.89099	4.88445	5.01367	5.09362	5.12519	5.04622	33.6288	-3.84694	1.58364	-2.42917	0.0151333	0.093784	0.101494	5.00902
4632428N05Rik	11.0162	10.1838	10.2827	9.79403	9.74464	9.19437	1214.53	1.33911	0.321438	4.166	3.1e-05	0.00081547	0.615659	10.0359
4632434I11Rik	6.97364	6.66591	7.71352	7.17615	7.5792	7.90538	197.415	-2.08377	1.11538	-1.86821	0.0617323	0.232188	0.475761	7.33563
4732415M23Rik	1.59754	1.58259	1.59153	1.59564	1.58237	1.61386	3.02183	-0.247134	3.82847	-0.0645516	0.948531	NA	0.011673	1.59392
4732416N19Rik	1.36289	1.35636	1.35614	1.36949	1.39137	1.36014	2.59824	-2.60002	3.88952	-0.668468	0.503835	NA	0.0133414	1.36607
4732418C07Rik	12.6402	12.3361	12.4344	12.3441	12.1836	12.1126	5244.08	0.312822	0.167572	1.86679	0.0619314	0.232619	0.1872	12.3418
4732456N10Rik	5.51225	5.52187	5.65769	6.03827	5.78917	5.9096	59.8667	-6.56832	1.72451	-3.80882	0.000139633	0.00279897	0.212768	5.73814
4732471D19Rik	10.231	9.87367	10.0369	10.0127	8.71706	9.79724	965.247	0.853149	0.404484	2.10923	0.0349248	0.163495	0.540837	9.77812
4732471J01Rik	2.8599	2.84027	2.84431	2.8922	2.88991	2.87922	7.34182	-3.10238	2.47179	-1.25512	0.209436	NA	0.0227436	2.86763
4732490B19Rik	-0.421241	-0.41989	-0.421209	-0.421239	-0.421204	-0.406687	0.692945	-1.17386	4.01144	-0.292629	0.769806	NA	0.00584993	-0.418578
4732491K20Rik	7.08368	6.70363	7.19181	6.84557	7.18719	7.15609	137.218	-0.34603	0.833313	-0.415247	0.677961	0.847899	0.205025	7.028
4831426I19Rik	6.49676	5.95878	6.28817	6.28117	6.22174	6.24462	80.2468	-0.847289	1.3081	-0.647725	0.517163	0.746929	0.172592	6.24854
4831440E17Rik	6.02744	6.19541	5.96589	6.0003	5.80364	6.13292	67.9761	0.80675	1.13437	0.711189	0.476967	0.719243	0.136893	6.02093
4832428D23Rik	2.3978	2.38745	2.37295	2.37432	2.35912	2.38305	5.22608	1.73073	2.72738	0.634575	0.525706	NA	0.0133775	2.37911
4833403I15Rik	3.30795	3.30935	3.31319	3.31588	3.46406	3.37537	10.8013	-5.04263	2.48742	-2.02725	0.0426364	NA	0.0625436	3.34763
4833412C05Rik	5.30522	5.26165	5.34132	5.46201	5.87851	5.44473	51.2174	-3.10248	1.41061	-2.19939	0.0278504	0.14137	0.224515	5.44891
4833417C18Rik	6.45485	7.19838	6.47705	6.56781	6.67375	6.46008	114.795	0.350215	0.761949	0.45963	0.645782	0.829843	0.286823	6.63865
4833418N02Rik	6.46509	6.88204	6.51482	6.7026	6.45926	6.55284	101.8	0.120955	0.861547	0.140393	0.888349	0.950577	0.165814	6.59611
4833419F23Rik	6.1024	6.72813	6.28524	6.05169	6.38302	6.38379	90.0497	0.541903	0.786497	0.689009	0.490818	0.729433	0.242951	6.32238
4833420G17Rik	10.3396	10.0133	10.2283	10.1896	10.0687	10.1482	1153.55	0.08549	0.24714	0.345917	0.729405	0.876944	0.116325	10.1646
4833422C13Rik	5.22106	5.85503	5.3195	5.18891	5.37325	5.24899	50.9211	1.66129	0.96457	1.72232	0.0850124	0.283327	0.247955	5.36779
4833423E24Rik	1.7262	1.72665	1.72637	1.76762	1.7264	1.76172	3.37414	-4.85988	3.92249	-1.23898	0.215354	NA	0.0198477	1.73916
4833424O15Rik	1.91933	1.83734	1.83705	1.83688	1.83708	1.83701	3.73942	2.24666	3.95996	0.567343	0.570481	NA	0.0335836	1.85078
4833427F10Rik	6.16811	5.92014	6.26319	6.221	6.35404	6.25746	76.4792	-1.58769	1.33736	-1.18719	0.235154	0.505171	0.148836	6.19732
4833427G06Rik	3.21224	3.21355	3.24053	3.226	3.35097	3.25269	9.94438	-4.46735	2.63884	-1.69292	0.0904712	NA	0.0521916	3.24933
4833428L15Rik	3.1624	3.28821	3.2046	3.19182	3.17348	3.17104	9.61955	1.31018	2.51619	0.520701	0.602575	NA	0.0465019	3.19859
4833439L19Rik	12.4524	11.5675	12.6098	12.2784	12.3696	12.7069	5367.62	-0.292528	0.265952	-1.09993	0.271364	0.545067	0.405192	12.3308
4833442J19Rik	7.17153	7.42412	7.77486	7.65571	7.54547	7.83086	200.428	-0.772223	0.592759	-1.30276	0.192657	0.45233	0.24412	7.56709
4921501E09Rik	0	0	0	0	0	0	0	NA	NA	NA	NA	NA	0	0
4921504E06Rik	-0.421241	-0.41989	-0.421209	-0.421239	-0.421204	-0.406687	0.692945	-1.17386	4.01144	-0.292629	0.769806	NA	0.00584993	-0.418578
4921506M07Rik	0	0	0	0	0	0	0	NA	NA	NA	NA	NA	0	0
4921507L20Rik	4.63655	4.5401	4.72414	4.66971	4.53804	4.7059	25.6904	0.0526145	1.65446	0.0318016	0.97463	0.990404	0.0807251	4.63574
4921507P07Rik	2.24756	2.16532	2.17413	2.16473	2.16498	2.17688	4.65767	2.00362	3.86433	0.518492	0.604115	NA	0.0324077	2.18227
4921508A21Rik	5.46764	5.25994	5.38574	5.43156	5.47154	5.43785	43.2336	-1.2377	1.26808	-0.976038	0.329046	0.600014	0.0793116	5.40904
4921508D12Rik	0	0	0	0	0	0	0	NA	NA	NA	NA	NA	0	0
4921509C19Rik	-1.25165	-1.25011	-1.2511	-1.25165	-1.25095	-1.24589	0.346473	-0.991849	4.04905	-0.244959	0.806489	NA	0.00219631	-1.25022
4921509O07Rik	0	0	0	0	0	0	0	NA	NA	NA	NA	NA	0	0
4921510H08Rik	-1.25165	-1.25011	-1.2511	-1.25165	-1.25095	-1.24589	0.346473	-0.991849	4.04905	-0.244959	0.806489	NA	0.00219631	-1.25022
4921511C10Rik	4.95636	4.87942	5.02351	5.03273	4.93442	5.15814	33.3359	-1.88254	1.40404	-1.3408	0.179987	0.437398	0.0973004	4.99743
4921511C20Rik	0	0	0	0	0	0	0	NA	NA	NA	NA	NA	0	0
4921511H03Rik	0	0	0	0	0	0	0	NA	NA	NA	NA	NA	0	0
4921511I17Rik	0	0	0	0	0	0	0	NA	NA	NA	NA	NA	0	0
4921511M17Rik	0	0	0	0	0	0	0	NA	NA	NA	NA	NA	0	0
4921513D23Rik	7.23212	7.23586	7.3631	7.29285	7.62922	7.1046	164.795	-0.146344	0.666476	-0.219579	0.826199	0.923214	0.178194	7.30962
4921513I03Rik	4.7344	5.18128	4.74267	4.71417	4.77792	4.75958	33.2984	1.12823	1.24444	0.906617	0.36461	0.630924	0.179127	4.81834
4921515E04Rik	4.53358	4.58314	4.48835	4.48443	4.6277	4.49081	23.8112	0.226951	1.28183	0.177052	0.859468	0.938352	0.0593258	4.53467
4921515J06Rik	1.44574	1.43752	1.46011	1.43716	1.43732	1.4689	2.74885	1.72582	3.89986	0.442533	0.658103	NA	0.0136361	1.44779
4921517D21Rik	0	0	0	0	0	0	0	NA	NA	NA	NA	NA	0	0
4921517D22Rik	-0.614722	-0.614813	-0.616179	-0.612876	-0.616175	-0.609276	0.584796	-1.28971	3.97283	-0.324633	0.745459	NA	0.00261695	-0.614007
4921517L17Rik	5.20375	5.00704	5.2198	5.02965	5.27416	5.12852	36.9936	0.203077	1.7465	0.116277	0.907433	0.959855	0.108011	5.14382
4921523A10Rik	4.87293	4.7118	4.80276	4.79687	4.72708	4.85996	28.2945	-0.192414	1.25056	-0.153863	0.877718	0.945522	0.0661658	4.79523
4921524J17Rik	10.0947	10.4181	9.7849	10.298	11.2175	10.2228	1421.21	-0.6677	0.271412	-2.46009	0.0138901	0.0882638	0.481662	10.3393
4921524L21Rik	0	0	0	0	0	0	0	NA	NA	NA	NA	NA	0	0
4921525B02Rik	0	0	0	0	0	0	0	NA	NA	NA	NA	NA	0	0
4921525O09Rik	4.46099	4.38725	4.48447	4.49144	4.51778	4.47596	22.3652	-1.52396	1.72584	-0.883026	0.377222	0.641819	0.044535	4.46965
4921528I01Rik	0	0	0	0	0	0	0	NA	NA	NA	NA	NA	0	0
4921528O07Rik	0	0	0	0	0	0	0	NA	NA	NA	NA	NA	0	0
4921530D09Rik	0.431785	0.42513	0.429608	0.432633	0.42503	0.436948	1.34227	-0.244394	3.88514	-0.0629048	0.949842	NA	0.00462044	0.430189
4921530L18Rik	4.50324	4.67422	4.48946	4.51763	4.55269	4.5977	24.4411	-0.511707	1.39687	-0.366325	0.714123	0.866786	0.0698709	4.55582
4921530L21Rik	0	0	0	0	0	0	0	NA	NA	NA	NA	NA	0	0
4921531C22Rik	7.11711	6.99199	7.02918	6.96219	6.92215	7.10623	130.958	0.211401	0.619044	0.341496	0.73273	0.878864	0.0782784	7.02147
4921531P14Rik	0	0	0	0	0	0	0	NA	NA	NA	NA	NA	0	0
4921533I20Rik	-2.01158	-2.01162	-2.01183	-2.01208	-2.0118	-2.01187	0.073322	1.16606	4.06331	0.286973	0.774133	NA	0.000182565	-2.0118
4921536K21Rik	4.19257	4.15345	4.18604	4.38423	4.21602	4.22642	19.589	-2.76121	1.67276	-1.65069	0.0988022	0.310686	0.0813807	4.22646
4921539E11Rik	-0.643728	-0.642264	-0.635588	-0.643726	-0.64364	-0.64016	0.571777	0.662832	4.00045	0.16569	0.868401	NA	0.00321958	-0.641517
4922501C03Rik	8.79068	7.61713	8.74995	8.39397	8.68768	8.77919	402.103	-0.626513	0.693164	-0.903846	0.366077	0.632462	0.458429	8.5031
4922501L14Rik	1.62217	1.62259	1.65861	1.62219	1.62236	1.65789	3.15329	0.240962	3.95954	0.060856	0.951474	NA	0.0185495	1.6343
4922502D21Rik	0	0	0	0	0	0	0	NA	NA	NA	NA	NA	0	0
4922502H24Rik	0	0	0	0	0	0	0	NA	NA	NA	NA	NA	0	0
4922502N22Rik	0	0	0	0	0	0	0	NA	NA	NA	NA	NA	0	0
4922505E12Rik	0	0	0	0	0	0	0	NA	NA	NA	NA	NA	0	0
4922505G16Rik	1.91635	1.89812	1.89781	1.92242	1.89784	1.94084	3.78465	-1.33184	3.86182	-0.344874	0.730189	NA	0.0176232	1.91223
4930401C15Rik	0	0	0	0	0	0	0	NA	NA	NA	NA	NA	0	0
4930401O10Rik	0	0	0	0	0	0	0	NA	NA	NA	NA	NA	0	0
4930401O12Rik	0	0	0	0	0	0	0	NA	NA	NA	NA	NA	0	0
4930402F06Rik	2.32846	2.32915	2.32872	2.33433	2.4168	2.35273	5.28347	-4.94224	3.7762	-1.30879	0.190607	NA	0.0347872	2.34836
4930402F11Rik	0	0	0	0	0	0	0	NA	NA	NA	NA	NA	0	0
4930402H24Rik	10.372	10.0419	10.7211	10.2941	9.8163	10.2474	1260.05	0.370673	0.258418	1.43439	0.15146	0.395776	0.306641	10.2488
4930403N07Rik	0	0	0	0	0	0	0	NA	NA	NA	NA	NA	0	0
4930404A05Rik	0	0	0	0	0	0	0	NA	NA	NA	NA	NA	0	0
4930404A10Rik	0	0	0	0	0	0	0	NA	NA	NA	NA	NA	0	0
4930404H11Rik	-0.735394	-0.73388	-0.73535	-0.735392	-0.735133	-0.724819	0.519709	-1.12718	4.02784	-0.279847	0.779595	NA	0.00420923	-0.733328
4930404H21Rik	0	0	0	0	0	0	0	NA	NA	NA	NA	NA	0	0
4930404I05Rik	1.84611	1.83289	1.83259	1.85538	1.86291	1.84854	3.60171	-3.15636	3.7042	-0.852104	0.394156	NA	0.0120898	1.8464
4930404N11Rik	5.28676	5.2742	5.25219	5.31107	5.13045	5.31082	38.9728	0.66075	1.24298	0.531586	0.595013	0.796847	0.0677457	5.26091
4930405A10Rik	0	0	0	0	0	0	0	NA	NA	NA	NA	NA	0	0
4930405A21Rik	5.10644	5.69258	5.20473	5.19964	5.2714	5.15331	45.9459	0.25021	1.30618	0.191558	0.848088	0.933159	0.213611	5.27135
4930405D11Rik	-0.667835	-0.666316	-0.667809	-0.667833	-0.663295	-0.660574	0.568504	-1.73259	4.01403	-0.431633	0.666008	NA	0.00303122	-0.66561
4930405J17Rik	0	0	0	0	0	0	0	NA	NA	NA	NA	NA	0	0
4930405P13Rik	6.41781	6.69077	6.34875	6.45231	6.42486	6.35507	90.3256	0.301845	0.753612	0.40053	0.688766	0.853572	0.125609	6.44826
4930406D18Rik	0	0	0	0	0	0	0	NA	NA	NA	NA	NA	0	0
4930407I10Rik	0	0	0	0	0	0	0	NA	NA	NA	NA	NA	0	0
4930408F14Rik	0	0	0	0	0	0	0	NA	NA	NA	NA	NA	0	0
4930412B13Rik	0	0	0	0	0	0	0	NA	NA	NA	NA	NA	0	0
4930412C18Rik	0	0	0	0	0	0	0	NA	NA	NA	NA	NA	0	0
4930412F15Rik	3.45939	3.37637	3.4886	3.39442	3.37557	3.40352	10.9581	1.83698	2.31973	0.791896	0.428421	NA	0.046862	3.41631
4930412O13Rik	-0.151107	-0.150028	-0.151067	-0.151104	-0.151059	-0.1323	0.866182	-1.20502	4.00089	-0.301187	0.763272	NA	0.00759418	-0.147778
4930413E15Rik	0	0	0	0	0	0	0	NA	NA	NA	NA	NA	0	0
4930413F20Rik	0	0	0	0	0	0	0	NA	NA	NA	NA	NA	0	0
4930413G21Rik	7.0921	6.98183	6.95806	7.06098	6.94542	6.9541	128.505	0.0949809	0.596966	0.159106	0.873585	0.94417	0.0622371	6.99875
4930413M19Rik	0	0	0	0	0	0	0	NA	NA	NA	NA	NA	0	0
4930414L22Rik	7.28888	6.94082	7.24374	7.27865	7.10439	7.21638	147.661	-0.215858	0.598389	-0.360731	0.718301	0.869791	0.134082	7.17881
4930414N06Rik	-0.632223	-0.630847	-0.632199	-0.620788	-0.632194	-0.632204	0.577505	-1.09265	3.98032	-0.274513	0.78369	NA	0.00458246	-0.630076
4930415F15Rik	2.21676	2.20879	2.22672	2.2534	2.20844	2.24387	4.70283	-0.923974	3.21847	-0.287085	0.774047	NA	0.0187605	2.22633
4930415L06Rik	0	0	0	0	0	0	0	NA	NA	NA	NA	NA	0	0
4930415O20Rik	-0.474369	-0.472975	-0.474339	-0.474367	-0.460445	-0.474345	0.666092	-1.16456	4.03817	-0.288389	0.773049	NA	0.0055932	-0.471807
4930417G10Rik	3.96442	4.45513	3.97235	3.96454	3.96624	3.97676	22.0814	1.48066	2.64474	0.559851	0.575581	0.784678	0.198579	4.04991
4930417O13Rik	3.82971	3.75607	3.83984	3.8004	3.75501	3.86928	14.2627	0.317681	2.1	0.151277	0.879757	0.946674	0.0464818	3.80838
4930417O22Rik	1.47503	1.48135	1.49463	1.47547	1.4769	1.4917	2.81036	0.292012	2.83332	0.103063	0.917913	NA	0.00859871	1.48252
4930419G24Rik	-1.59582	-1.59501	-1.59548	-1.594	-1.59541	-1.59557	0.165001	-0.935355	4.03964	-0.231544	0.816892	NA	0.000651238	-1.59522
4930420K17Rik	9.74566	10.0763	9.57767	9.35026	10.2481	9.51982	908.555	0.158886	0.312472	0.508479	0.611117	0.808337	0.345541	9.75296
4930422G04Rik	7.76981	6.96944	8.2889	8.17207	7.61271	8.40661	281.434	-1.7364	0.847736	-2.04828	0.040533	0.178858	0.537011	7.86992
4930423M02Rik	0	0	0	0	0	0	0	NA	NA	NA	NA	NA	0	0
4930425K10Rik	0	0	0	0	0	0	0	NA	NA	NA	NA	NA	0	0
4930425O10Rik	-1.66921	-1.66993	-1.67035	-1.67065	-1.67029	-1.67043	0.146644	1.55913	4.0456	0.385388	0.69995	NA	0.000512965	-1.67014
4930426L09Rik	1.4429	1.44326	1.44304	1.48602	1.44306	1.46283	2.7637	-4.3062	3.91205	-1.10075	0.271004	NA	0.0177758	1.45352
4930427A07Rik	8.97895	8.93991	10.0131	9.32963	8.7897	10.1052	761.958	-0.161296	0.325805	-0.49507	0.620551	0.814936	0.570915	9.35942
4930428D18Rik	0	0	0	0	0	0	0	NA	NA	NA	NA	NA	0	0
4930428E07Rik	0	0	0	0	0	0	0	NA	NA	NA	NA	NA	0	0
4930428E23Rik	0	0	0	0	0	0	0	NA	NA	NA	NA	NA	0	0
4930428G15Rik	0	0	0	0	0	0	0	NA	NA	NA	NA	NA	0	0
4930428O21Rik	-1.25165	-1.25011	-1.2511	-1.25165	-1.25095	-1.24589	0.346473	-0.991849	4.04905	-0.244959	0.806489	NA	0.00219631	-1.25022
4930429B21Rik	6.04626	5.74153	6.03109	6.08676	5.90893	6.06649	65.4297	-1.41512	1.23983	-1.14138	0.25371	0.525654	0.132514	5.98018
4930429D17Rik	0	0	0	0	0	0	0	NA	NA	NA	NA	NA	0	0
4930429F11Rik	0	0	0	0	0	0	0	NA	NA	NA	NA	NA	0	0
4930429F24Rik	5.19336	6.21267	5.13607	5.20207	5.26964	5.20182	65.115	0.193538	1.31284	0.147419	0.882802	0.947827	0.415347	5.36927
4930430A15Rik	0	0	0	0	0	0	0	NA	NA	NA	NA	NA	0	0
4930430D24Rik	0	0	0	0	0	0	0	NA	NA	NA	NA	NA	0	0
4930430F08Rik	6.20354	6.39755	6.64448	6.57374	6.40156	6.78181	97.3667	-1.144	0.884603	-1.29324	0.195929	0.456808	0.206786	6.50045
4930430F21Rik	0	0	0	0	0	0	0	NA	NA	NA	NA	NA	0	0
4930430J02Rik	-0.287758	-0.286518	-0.287722	-0.282412	-0.287716	-0.276655	0.767211	-2.69719	3.97299	-0.678882	0.497212	NA	0.00448975	-0.284797
4930431A04Rik	0	0	0	0	0	0	0	NA	NA	NA	NA	NA	0	0
4930431P03Rik	1.95494	1.95547	2.02188	1.95496	1.95518	1.97908	4.02847	0.790709	3.95857	0.199746	0.841679	NA	0.0270438	1.97025
4930432J09Rik	0	0	0	0	0	0	0	NA	NA	NA	NA	NA	0	0
4930432K09Rik	0	0	0	0	0	0	0	NA	NA	NA	NA	NA	0	0
4930432K21Rik	0.442395	0.442578	0.442464	0.4424	0.442476	0.474001	1.38589	-1.25741	3.98385	-0.315628	0.752285	NA	0.0128756	0.447719
4930432M17Rik	1.24898	1.23737	1.23717	1.25987	1.2372	1.25695	2.36944	-1.51279	3.89376	-0.388516	0.697634	NA	0.0104941	1.24626
4930433B08Rik	0	0	0	0	0	0	0	NA	NA	NA	NA	NA	0	0
4930433I11Rik	0	0	0	0	0	0	0	NA	NA	NA	NA	NA	0	0
4930433N12Rik	0.781771	0.771803	0.776238	0.796164	0.771677	0.771644	1.71171	0.833103	3.9501	0.210907	0.83296	NA	0.00965145	0.778216
4930434J06Rik	0	0	0	0	0	0	0	NA	NA	NA	NA	NA	0	0
4930435E12Rik	0	0	0	0	0	0	0	NA	NA	NA	NA	NA	0	0
4930438E09Rik	0	0	0	0	0	0	0	NA	NA	NA	NA	NA	0	0
4930440C22Rik	-0.151107	-0.150028	-0.151067	-0.151104	-0.151059	-0.1323	0.866182	-1.20502	4.00089	-0.301187	0.763272	NA	0.00759418	-0.147778
4930441J16Rik	0	0	0	0	0	0	0	NA	NA	NA	NA	NA	0	0
4930441O14Rik	3.38493	3.24011	3.27134	3.25437	3.23939	3.26721	10.0865	1.52302	2.47993	0.614139	0.539123	NA	0.0548821	3.27622
4930442J19Rik	0	0	0	0	0	0	0	NA	NA	NA	NA	NA	0	0
4930442L01Rik	-1.25165	-1.25011	-1.2511	-1.25165	-1.25095	-1.24589	0.346473	-0.991849	4.04905	-0.244959	0.806489	NA	0.00219631	-1.25022
4930443G12Rik	0	0	0	0	0	0	0	NA	NA	NA	NA	NA	0	0
4930443O20Rik	0.494459	0.49465	0.517325	0.496403	0.494544	0.502545	1.42532	-0.180674	3.97046	-0.0455045	0.963705	NA	0.0090405	0.499988
4930444A02Rik	9.16777	9.4766	8.96559	9.02275	9.38658	9.12099	596.799	0.0447197	0.327442	0.136573	0.891368	0.95211	0.202175	9.19005
4930444F02Rik	-0.735394	-0.73388	-0.73535	-0.735392	-0.735133	-0.724819	0.519709	-1.12718	4.02784	-0.279847	0.779595	NA	0.00420923	-0.733328
4930444G20Rik	3.39716	3.6564	3.40472	3.40684	3.39396	3.39367	12.6363	3.53806	2.66115	1.32952	0.183675	NA	0.105116	3.44212
4930444M15Rik	3.3722	3.36318	3.43834	3.43328	3.42752	3.38242	10.7151	-2.32865	2.25699	-1.03175	0.30219	NA	0.0338373	3.40282
4930444P10Rik	3.04179	3.01199	3.01129	3.01678	3.14464	3.03142	8.65034	-3.8617	2.92248	-1.32138	0.186375	NA	0.0512249	3.04298
4930447A16Rik	-2.01158	-2.01162	-2.01183	-2.01208	-2.0118	-2.01187	0.073322	1.16606	4.06331	0.286973	0.774133	NA	0.000182565	-2.0118
4930447C04Rik	1.4191	1.37143	1.37122	1.37875	1.37124	1.37518	2.62958	0.310503	3.95276	0.0785536	0.937388	NA	0.0188295	1.38115
4930447J18Rik	0	0	0	0	0	0	0	NA	NA	NA	NA	NA	0	0
4930447K03Rik	1.18865	1.17531	1.1843	1.18079	1.17514	1.19886	2.27204	0.264863	3.86254	0.0685721	0.94533	NA	0.009019	1.18384
4930447N08Rik	0	0	0	0	0	0	0	NA	NA	NA	NA	NA	0	0
4930448C13Rik	0	0	0	0	0	0	0	NA	NA	NA	NA	NA	0	0
4930448F12Rik	0	0	0	0	0	0	0	NA	NA	NA	NA	NA	0	0
4930448H16Rik	-0.068975	-0.0680189	-0.0689315	-0.0526818	-0.0689238	-0.065139	0.915742	-2.39066	3.95375	-0.604656	0.545408	NA	0.00642397	-0.065445
4930448I06Rik	-1.95198	-1.9509	-1.95139	-1.95198	-1.95132	-1.95013	0.173236	-0.582649	4.07006	-0.143155	0.886168	NA	0.000701779	-1.95128
4930448I18Rik	-0.600733	-0.611053	-0.612406	-0.612429	-0.612401	-0.612411	0.586576	2.10217	4.0002	0.525516	0.599225	NA	0.00468857	-0.610239
4930448K20Rik	-1.63193	-1.63192	-1.63237	-1.63183	-1.6323	-1.63245	0.155823	0.297322	4.02017	0.0739575	0.941044	NA	0.000269946	-1.63213
4930449E01Rik	0	0	0	0	0	0	0	NA	NA	NA	NA	NA	0	0
4930449E18Rik	-1.95198	-1.9509	-1.95139	-1.95198	-1.95132	-1.95013	0.173236	-0.582649	4.07006	-0.143155	0.886168	NA	0.000701779	-1.95128
4930449I24Rik	0	0	0	0	0	0	0	NA	NA	NA	NA	NA	0	0
4930451C15Rik	5.4717	5.45044	5.51768	5.39827	5.59807	5.41294	45.4057	0.309325	1.04602	0.295714	0.767448	0.895552	0.0739205	5.47485
4930451I11Rik	0	0	0	0	0	0	0	NA	NA	NA	NA	NA	0	0
4930452A19Rik	0	0	0	0	0	0	0	NA	NA	NA	NA	NA	0	0
4930452B06Rik	5.87202	5.60948	5.86399	5.90918	5.85085	5.82767	58.0325	-1.35877	1.36742	-0.99368	0.320379	0.591982	0.107605	5.8222
4930452G13Rik	6.50868	6.53115	6.75612	6.87818	7.05111	7.18813	125.156	-2.07391	0.654153	-3.17038	0.0015224	0.0177713	0.274498	6.8189
4930452N14Rik	0	0	0	0	0	0	0	NA	NA	NA	NA	NA	0	0
4930453H23Rik	-0.735394	-0.73388	-0.73535	-0.735392	-0.735133	-0.724819	0.519709	-1.12718	4.02784	-0.279847	0.779595	NA	0.00420923	-0.733328
4930453N24Rik	9.87345	9.86854	10.2187	10.1119	10.6102	10.487	1215.18	-0.599411	0.282924	-2.11863	0.0341218	0.16113	0.308265	10.195
4930455B14Rik	0	0	0	0	0	0	0	NA	NA	NA	NA	NA	0	0
4930455C13Rik	2.83159	2.79366	2.81146	2.85802	2.79314	2.8325	7.10337	-0.451992	2.74015	-0.164952	0.868982	NA	0.0253937	2.82006
4930455C21Rik	6.68319	6.67956	6.544	6.88774	6.92169	6.65544	109.777	-0.875658	0.645247	-1.35709	0.174753	0.430142	0.145949	6.7286
4930455D15Rik	0.185365	0.185845	0.189937	0.198536	0.18543	0.193265	1.12325	-1.52908	3.91919	-0.390151	0.696425	NA	0.00534266	0.18973
4930455F16Rik	0	0	0	0	0	0	0	NA	NA	NA	NA	NA	0	0
4930455F23Rik	5.6257	5.75677	5.43008	5.48612	5.66457	5.71938	51.6714	-0.335965	1.36355	-0.246389	0.805381	0.912987	0.129891	5.61377
4930455H04Rik	-0.681635	-0.683178	-0.676492	-0.684687	-0.684491	-0.684669	0.545184	2.67045	4.00091	0.667462	0.504477	NA	0.00318605	-0.682525
4930455J16Rik	0	0	0	0	0	0	0	NA	NA	NA	NA	NA	0	0
4930456L15Rik	0	0	0	0	0	0	0	NA	NA	NA	NA	NA	0	0
4930458L03Rik	0	0	0	0	0	0	0	NA	NA	NA	NA	NA	0	0
4930459L07Rik	0	0	0	0	0	0	0	NA	NA	NA	NA	NA	0	0
4930461G14Rik	0	0	0	0	0	0	0	NA	NA	NA	NA	NA	0	0
4930465A12Rik	0	0	0	0	0	0	0	NA	NA	NA	NA	NA	0	0
4930465K10Rik	3.68332	3.78302	3.66881	3.66177	3.64607	3.70062	13.3831	1.35242	1.83492	0.737044	0.461096	0.707861	0.0489554	3.6906
4930465M20Rik	0	0	0	0	0	0	0	NA	NA	NA	NA	NA	0	0
4930467D21Rik	0	0	0	0	0	0	0	NA	NA	NA	NA	NA	0	0
4930467E23Rik	0	0	0	0	0	0	0	NA	NA	NA	NA	NA	0	0
4930467K11Rik	0.622764	0.609341	0.622921	0.609142	0.609227	0.617195	1.53086	2.32091	3.91484	0.592849	0.553282	NA	0.00674449	0.615098
4930468A15Rik	0	0	0	0	0	0	0	NA	NA	NA	NA	NA	0	0
4930469G21Rik	-1.25165	-1.25011	-1.2511	-1.25165	-1.25095	-1.24589	0.346473	-0.991849	4.04905	-0.244959	0.806489	NA	0.00219631	-1.25022
4930470H14Rik	10.0452	10.3856	10.0484	9.77243	9.80924	10.0461	1057.72	0.422898	0.296256	1.42748	0.153443	0.39894	0.219753	10.0178
4930470P17Rik	0	0	0	0	0	0	0	NA	NA	NA	NA	NA	0	0
4930471C04Rik	0	0	0	0	0	0	0	NA	NA	NA	NA	NA	0	0
4930471G03Rik	0	0	0	0	0	0	0	NA	NA	NA	NA	NA	0	0
4930471I20Rik	0	0	0	0	0	0	0	NA	NA	NA	NA	NA	0	0
4930471M09Rik	0.309731	0.309896	0.309793	0.334294	0.309804	0.313767	1.24575	-2.45345	3.94045	-0.622632	0.533527	NA	0.00980255	0.314548
4930471M23Rik	10.4168	10.5109	10.0981	10.4995	10.4845	10.1991	1336.28	-0.0757208	0.231177	-0.327545	0.743256	0.883311	0.176098	10.3681
4930473A02Rik	4.52274	4.59494	4.54613	4.50792	4.45498	4.50197	23.3732	1.2869	1.35413	0.950348	0.341935	0.612782	0.0468882	4.52145
4930473A06Rik	5.35879	5.26052	5.53251	5.56056	5.36072	5.48137	44.8515	-1.83945	1.34994	-1.36262	0.173002	0.427408	0.117197	5.42575
4930473O22Rik	-0.421241	-0.41989	-0.421209	-0.421239	-0.421204	-0.406687	0.692945	-1.17386	4.01144	-0.292629	0.769806	NA	0.00584993	-0.418578
4930474G06Rik	1.7061	1.69119	1.70011	1.71739	1.69095	1.71466	3.25287	-0.493973	3.70253	-0.133415	0.893865	NA	0.0113537	1.7034
4930474H20Rik	0	0	0	0	0	0	0	NA	NA	NA	NA	NA	0	0
4930474M22Rik	5.31051	4.92538	5.12873	5.02773	4.92827	5.03501	36.1787	1.01318	1.35866	0.745721	0.455836	0.705024	0.14465	5.05927
4930474N05Rik	0	0	0	0	0	0	0	NA	NA	NA	NA	NA	0	0
4930474N09Rik	0	0	0	0	0	0	0	NA	NA	NA	NA	NA	0	0
4930478L05Rik	0	0	0	0	0	0	0	NA	NA	NA	NA	NA	0	0
4930478P22Rik	0	0	0	0	0	0	0	NA	NA	NA	NA	NA	0	0
4930479D17Rik	-1.03653	-1.04154	-1.04258	-1.04286	-1.04243	-1.04278	0.36661	2.02673	4.0234	0.503734	0.614448	NA	0.00245809	-1.04145
4930479M11Rik	0	0	0	0	0	0	0	NA	NA	NA	NA	NA	0	0
4930480E11Rik	0	0	0	0	0	0	0	NA	NA	NA	NA	NA	0	0
4930480G23Rik	0	0	0	0	0	0	0	NA	NA	NA	NA	NA	0	0
4930480K15Rik	0.182713	0.176507	0.185048	0.181667	0.176061	0.179974	1.11257	0.770824	3.89924	0.197686	0.843291	NA	0.00354096	0.180328
4930480M12Rik	0	0	0	0	0	0	0	NA	NA	NA	NA	NA	0	0
4930481A15Rik	7.82582	8.07633	7.44423	7.96111	8.13609	7.68146	244.623	-0.440426	0.474534	-0.928123	0.353344	0.621861	0.260368	7.85417
4930483J18Rik	-0.151107	-0.150028	-0.151067	-0.151104	-0.151059	-0.1323	0.866182	-1.20502	4.00089	-0.301187	0.763272	NA	0.00759418	-0.147778
4930483K19Rik	3.45819	3.39586	3.47507	3.45132	3.39505	3.44245	10.927	0.579797	2.31694	0.250242	0.8024	NA	0.0334158	3.43632
4930483O08Rik	-2.01158	-2.01162	-2.01183	-2.01208	-2.0118	-2.01187	0.073322	1.16606	4.06331	0.286973	0.774133	NA	0.000182565	-2.0118
4930486F22Rik	-1.95198	-1.9509	-1.95139	-1.95198	-1.95132	-1.95013	0.173236	-0.582649	4.07006	-0.143155	0.886168	NA	0.000701779	-1.95128
4930486I03Rik	0	0	0	0	0	0	0	NA	NA	NA	NA	NA	0	0
4930486L24Rik	0	0	0	0	0	0	0	NA	NA	NA	NA	NA	0	0
4930487D11Rik	0	0	0	0	0	0	0	NA	NA	NA	NA	NA	0	0
4930487H11Rik	3.30603	3.38989	3.25317	3.26766	3.24851	3.25245	10.3168	2.58088	2.33962	1.10312	0.269976	NA	0.0550253	3.28629
4930488B22Rik	0	0	0	0	0	0	0	NA	NA	NA	NA	NA	0	0
4930488L21Rik	-1.29816	-1.29701	-1.29772	-1.29439	-1.29762	-1.29786	0.247502	-1.00079	4.01386	-0.249334	0.803102	NA	0.00139244	-1.29712
4930500F04Rik	0	0	0	0	0	0	0	NA	NA	NA	NA	NA	0	0
4930500J02Rik	2.53267	2.52999	2.53416	2.54283	2.63136	2.54158	6.10578	-3.0037	2.64508	-1.13558	0.256131	NA	0.0391571	2.5521
4930500L23Rik	0	0	0	0	0	0	0	NA	NA	NA	NA	NA	0	0
4930502A04Rik	0	0	0	0	0	0	0	NA	NA	NA	NA	NA	0	0
4930502E09Rik	0.612295	0.595592	0.600041	0.608731	0.595481	0.595452	1.50999	1.30566	3.94719	0.330781	0.74081	NA	0.00746115	0.601265
4930502E18Rik	-0.421241	-0.41989	-0.421209	-0.421239	-0.421204	-0.406687	0.692945	-1.17386	4.01144	-0.292629	0.769806	NA	0.00584993	-0.418578
4930503B20Rik	-0.790435	-0.794746	-0.792328	-0.796195	-0.795935	-0.79618	0.492558	2.70156	4.00364	0.674776	0.499818	NA	0.0024012	-0.794303
4930503E14Rik	1.3399	1.34025	1.36737	1.33991	1.34006	1.37168	2.58151	0.150627	3.96141	0.0380237	0.969669	NA	0.0152924	1.34986
4930503E24Rik	-1.59582	-1.59501	-1.59548	-1.594	-1.59541	-1.59557	0.165001	-0.935355	4.03964	-0.231544	0.816892	NA	0.000651238	-1.59522
4930503H13Rik	0	0	0	0	0	0	0	NA	NA	NA	NA	NA	0	0
4930503L19Rik	10.1041	9.34869	10.1559	10.6288	10.4525	10.4549	1250.12	-0.935122	0.328152	-2.84966	0.00437655	0.0389527	0.45781	10.1908
4930503O07Rik	0	0	0	0	0	0	0	NA	NA	NA	NA	NA	0	0
4930504O13Rik	0	0	0	0	0	0	0	NA	NA	NA	NA	NA	0	0
4930505A04Rik	2.92142	2.86247	2.88475	2.92855	2.86192	2.88178	7.47215	0.247036	2.69198	0.0917672	0.926883	NA	0.0286877	2.89015
4930505G20Rik	0	0	0	0	0	0	0	NA	NA	NA	NA	NA	0	0
4930506M07Rik	2.86651	2.86403	2.93504	2.86304	2.95198	2.87147	7.67799	1.63839	3.03927	0.539074	0.589835	NA	0.0403552	2.89201
4930507D05Rik	5.86728	5.79186	5.76454	5.75824	5.71625	5.92498	56.821	0.176328	0.950616	0.185488	0.852846	0.935322	0.0776393	5.80386
4930509E16Rik	2.48371	2.45222	2.50122	2.47641	2.45695	2.46774	5.57257	0.24063	2.59088	0.0928759	0.926002	NA	0.0181095	2.47304
4930509J09Rik	0	0	0	0	0	0	0	NA	NA	NA	NA	NA	0	0
4930509K18Rik	0	0	0	0	0	0	0	NA	NA	NA	NA	NA	0	0
4930511A02Rik	0	0	0	0	0	0	0	NA	NA	NA	NA	NA	0	0
4930511E03Rik	0	0	0	0	0	0	0	NA	NA	NA	NA	NA	0	0
4930511I11Rik	-1.95198	-1.9509	-1.95139	-1.95198	-1.95132	-1.95013	0.173236	-0.582649	4.07006	-0.143155	0.886168	NA	0.000701779	-1.95128
4930511M06Rik	7.68277	8.02626	7.77524	7.72368	7.91395	7.66767	227.164	0.158281	0.472207	0.335193	0.737479	0.880837	0.142724	7.79826
4930511M11Rik	-1.14527	-1.14769	-1.14856	-1.14758	-1.14843	-1.14872	0.302467	0.859796	3.99359	0.215294	0.829538	NA	0.00128352	-1.14771
4930512B01Rik	3.61452	3.58676	3.62718	3.61242	3.73324	3.62578	12.8102	-1.37233	2.08684	-0.657613	0.510787	NA	0.0510625	3.63332
4930513D17Rik	0	0	0	0	0	0	0	NA	NA	NA	NA	NA	0	0
4930513N10Rik	4.8152	4.72875	4.78079	4.83528	5.03015	4.85384	30.1979	-2.22019	1.62338	-1.36763	0.171427	0.425273	0.102826	4.84067
4930513O06Rik	0	0	0	0	0	0	0	NA	NA	NA	NA	NA	0	0
4930515B02Rik	-0.421241	-0.41989	-0.421209	-0.421239	-0.421204	-0.406687	0.692945	-1.17386	4.01144	-0.292629	0.769806	NA	0.00584993	-0.418578
4930515G01Rik	3.41091	3.37301	3.39984	3.41196	3.44686	3.43495	10.7168	-1.89261	2.12483	-0.89071	0.373085	NA	0.0261001	3.41292
4930515G16Rik	0	0	0	0	0	0	0	NA	NA	NA	NA	NA	0	0
4930515L03Rik	0	0	0	0	0	0	0	NA	NA	NA	NA	NA	0	0
4930515L19Rik	0	0	0	0	0	0	0	NA	NA	NA	NA	NA	0	0
4930517E11Rik	0.0929858	0.0837361	0.0964055	0.0830385	0.0830946	0.0830752	1.03774	3.44741	3.98271	0.865593	0.386713	NA	0.00602127	0.0870559
4930518P08Rik	0	0	0	0	0	0	0	NA	NA	NA	NA	NA	0	0
4930519D14Rik	0	0	0	0	0	0	0	NA	NA	NA	NA	NA	0	0
4930519F09Rik	5.24476	5.1091	5.21915	5.21499	5.39353	5.24795	39.0012	-1.2513	1.35343	-0.924543	0.355204	0.623055	0.0914702	5.23825
4930519F16Rik	0	0	0	0	0	0	0	NA	NA	NA	NA	NA	0	0
4930519F24Rik	0	0	0	0	0	0	0	NA	NA	NA	NA	NA	0	0
4930519G04Rik	3.57077	3.51805	3.57604	3.55694	3.61073	3.54121	11.9273	-0.61372	2.14398	-0.286253	0.774685	NA	0.0317439	3.56229
4930519H02Rik	0.494459	0.49465	0.517325	0.496403	0.494544	0.502545	1.42532	-0.180674	3.97046	-0.0455045	0.963705	NA	0.0090405	0.499988
4930520O04Rik	4.28714	4.1548	4.20838	4.22841	4.20955	4.25775	18.8967	-1.28497	1.77469	-0.724056	0.469032	0.713931	0.0455771	4.22434
4930520P13Rik	0	0	0	0	0	0	0	NA	NA	NA	NA	NA	0	0
4930521A18Rik	0	0	0	0	0	0	0	NA	NA	NA	NA	NA	0	0
4930521E06Rik	0	0	0	0	0	0	0	NA	NA	NA	NA	NA	0	0
4930522H14Rik	0	0	0	0	0	0	0	NA	NA	NA	NA	NA	0	0
4930522O17Rik	0	0	0	0	0	0	0	NA	NA	NA	NA	NA	0	0
4930523C07Rik	14.67	14.1836	14.939	14.5629	14.6232	15.0018	26524.9	-0.152385	0.184649	-0.825271	0.409218	0.669691	0.294094	14.6634
4930523O13Rik	0	0	0	0	0	0	0	NA	NA	NA	NA	NA	0	0
4930524B15Rik	1.77314	1.7736	1.77331	1.8325	1.77334	1.79312	3.5062	-4.38172	3.90004	-1.12351	0.261222	NA	0.0238805	1.7865
4930524C18Rik	0	0	0	0	0	0	0	NA	NA	NA	NA	NA	0	0
4930524E20Rik	0	0	0	0	0	0	0	NA	NA	NA	NA	NA	0	0
4930524L23Rik	5.94688	6.62645	5.61873	5.88193	5.60528	5.754	81.546	0.706281	1.69104	0.417661	0.676195	0.847081	0.378776	5.90554
4930524N10Rik	0	0	0	0	0	0	0	NA	NA	NA	NA	NA	0	0
4930524O05Rik	0	0	0	0	0	0	0	NA	NA	NA	NA	NA	0	0
4930524O08Rik	0.0932354	0.0873115	0.0866827	0.103217	0.0866917	0.0866725	1.03579	-0.126904	3.96212	-0.0320294	0.974449	NA	0.00667818	0.0906351
4930525D18Rik	0.767105	0.767334	0.785421	0.784311	0.767207	0.771185	1.71282	-0.201233	3.87257	-0.0519637	0.958558	NA	0.00874585	0.773761
4930525F21Rik	-1.59582	-1.59501	-1.59548	-1.594	-1.59541	-1.59557	0.165001	-0.935355	4.03964	-0.231544	0.816892	NA	0.000651238	-1.59522
4930525G20Rik	2.74436	2.72463	2.75609	2.72375	2.72413	2.82643	6.95214	1.42608	3.57821	0.398546	0.690228	NA	0.0397824	2.7499
4930525M21Rik	0	0	0	0	0	0	0	NA	NA	NA	NA	NA	0	0
4930526D03Rik	-0.350138	-0.348842	-0.341685	-0.343079	-0.350099	-0.350112	0.728543	0.600546	3.93209	0.152729	0.878612	NA	0.00388604	-0.347326
4930526I15Rik	7.73572	7.93866	7.65434	7.85695	8.13029	7.75363	236.253	-0.368661	0.455166	-0.809947	0.417971	0.675622	0.171433	7.84493
4930526L06Rik	1.30483	1.29913	1.30788	1.29525	1.28957	1.29757	2.4651	1.96465	3.45375	0.568844	0.569462	NA	0.00660185	1.29904
4930527F14Rik	0	0	0	0	0	0	0	NA	NA	NA	NA	NA	0	0
4930527G23Rik	0	0	0	0	0	0	0	NA	NA	NA	NA	NA	0	0
4930528A17Rik	5.56498	5.71308	5.79729	5.69579	6.20287	5.70351	62.6751	-1.58401	1.06445	-1.4881	0.136724	0.374522	0.220349	5.77958
4930528D03Rik	3.29953	3.24515	3.25366	3.26904	3.3189	3.30327	9.81968	-2.40975	2.29348	-1.0507	0.293398	NA	0.0298284	3.28159
4930528F23Rik	3.1294	3.12018	3.17808	3.15549	3.11951	3.21867	9.1021	-0.73551	2.49869	-0.294358	0.768485	NA	0.0392465	3.15355
4930528P14Rik	0	0	0	0	0	0	0	NA	NA	NA	NA	NA	0	0
4930529C04Rik	0	0	0	0	0	0	0	NA	NA	NA	NA	NA	0	0
4930529F22Rik	-1.95198	-1.9509	-1.95139	-1.95198	-1.95132	-1.95013	0.173236	-0.582649	4.07006	-0.143155	0.886168	NA	0.000701779	-1.95128
4930529F24Rik	0	0	0	0	0	0	0	NA	NA	NA	NA	NA	0	0
4930529K09Rik	0	0	0	0	0	0	0	NA	NA	NA	NA	NA	0	0
4930529L06Rik	0	0	0	0	0	0	0	NA	NA	NA	NA	NA	0	0
4930529M08Rik	0.117008	0.10933	0.108736	0.108688	0.108746	0.124222	1.05956	0.769922	3.8987	0.197482	0.843451	NA	0.00648179	0.112788
4930533B01Rik	3.38062	3.34107	3.34487	3.40028	3.43351	3.38	10.55	-3.10958	2.28909	-1.35844	0.174325	NA	0.0347124	3.38006
4930533P14Rik	0	0	0	0	0	0	0	NA	NA	NA	NA	NA	0	0
4930534B04Rik	7.73385	7.00934	8.57225	8.20204	8.15188	8.68729	330.455	-2.23269	1.92161	-1.16189	0.245281	0.517071	0.61559	8.05944
4930538K18Rik	2.83933	2.77235	2.81691	2.80202	2.77183	2.78775	7.01186	1.23239	2.75488	0.447348	0.654624	NA	0.0265681	2.79836
4930539C22Rik	0	0	0	0	0	0	0	NA	NA	NA	NA	NA	0	0
4930539E08Rik	4.27125	4.15847	4.2425	4.25874	4.16232	4.27574	19.0486	-0.457532	1.66517	-0.274766	0.783496	0.901741	0.0537663	4.22817
4930539J05Rik	4.30753	4.33559	4.28004	4.34478	4.25986	4.32773	19.9924	0.0309445	1.4467	0.0213897	0.982935	0.993836	0.0334475	4.30926
4930539M17Rik	-0.00231281	-0.0223845	-0.0232055	-0.0232474	-0.0231975	-0.0232148	0.953186	2.16072	3.98326	0.542451	0.587508	NA	0.00847244	-0.0195937
4930539N22Rik	0	0	0	0	0	0	0	NA	NA	NA	NA	NA	0	0
4930540M03Rik	0	0	0	0	0	0	0	NA	NA	NA	NA	NA	0	0
4930542C21Rik	0.782238	0.78247	0.786928	0.793762	0.782341	0.806063	1.73369	-2.40009	3.91849	-0.612504	0.540204	NA	0.00949561	0.788967
4930542D17Rik	0	0	0	0	0	0	0	NA	NA	NA	NA	NA	0	0
4930542H20Rik	0.386667	0.38684	0.386732	0.416744	0.386744	0.386719	1.32001	-1.13946	3.96434	-0.287428	0.773784	NA	0.0122489	0.391741
4930543E12Rik	3.80304	3.72164	3.72049	3.83341	3.78108	3.77586	13.8708	-4.1406	2.51181	-1.64845	0.09926	0.311698	0.0447629	3.77259
4930544D05Rik	0	0	0	0	0	0	0	NA	NA	NA	NA	NA	0	0
4930544G11Rik	0	0	0	0	0	0	0	NA	NA	NA	NA	NA	0	0
4930544M13Rik	0	0	0	0	0	0	0	NA	NA	NA	NA	NA	0	0
4930544O15Rik	-0.546649	-0.549794	-0.543053	-0.551188	-0.551158	-0.551168	0.618506	2.8777	3.99504	0.720319	0.471329	NA	0.00333194	-0.548835
4930545E07Rik	0	0	0	0	0	0	0	NA	NA	NA	NA	NA	0	0
4930545H06Rik	0	0	0	0	0	0	0	NA	NA	NA	NA	NA	0	0
4930545L23Rik	1.16537	1.13213	1.1411	1.13185	1.13197	1.13991	2.21145	2.19159	3.88657	0.56389	0.572829	NA	0.0129372	1.14039
4930546C10Rik	0	0	0	0	0	0	0	NA	NA	NA	NA	NA	0	0
4930546K05Rik	1.29152	1.29185	1.29164	1.29153	1.3368	1.30369	2.51799	-3.04745	3.98048	-0.7656	0.443914	NA	0.0181075	1.30117
4930547C10Rik	0	0	0	0	0	0	0	NA	NA	NA	NA	NA	0	0
4930547E08Rik	0	0	0	0	0	0	0	NA	NA	NA	NA	NA	0	0
4930547E14Rik	0.22179	0.222188	0.230913	0.231288	0.221858	0.229745	1.15752	-1.01291	3.90253	-0.259552	0.795209	NA	0.00479573	0.226297
4930547N16Rik	6.88285	6.29035	6.69044	6.62394	6.64244	7.02376	112.896	-1.5927	1.21244	-1.31364	0.188969	0.447997	0.25096	6.69229
4930548G14Rik	0	0	0	0	0	0	0	NA	NA	NA	NA	NA	0	0
4930548H24Rik	-1.95198	-1.9509	-1.95139	-1.95198	-1.95132	-1.95013	0.173236	-0.582649	4.07006	-0.143155	0.886168	NA	0.000701779	-1.95128
4930548J01Rik	0	0	0	0	0	0	0	NA	NA	NA	NA	NA	0	0
4930548K13Rik	0	0	0	0	0	0	0	NA	NA	NA	NA	NA	0	0
4930549C01Rik	0	0	0	0	0	0	0	NA	NA	NA	NA	NA	0	0
4930549G23Rik	4.65328	4.52683	4.67796	4.69861	4.52481	4.64496	25.2998	0.129329	1.67237	0.0773333	0.938358	0.974354	0.0761621	4.62107
4930550C14Rik	6.02975	5.93765	6.25469	6.18681	6.49064	6.23042	79.1719	-1.98972	1.18568	-1.67813	0.0933222	0.29946	0.192643	6.18832
4930550L24Rik	0	0	0	0	0	0	0	NA	NA	NA	NA	NA	0	0
4930552N02Rik	0	0	0	0	0	0	0	NA	NA	NA	NA	NA	0	0
4930552P12Rik	-0.254875	-0.253665	-0.237768	-0.254872	-0.254831	-0.254845	0.797081	1.86805	4.01979	0.464713	0.642137	NA	0.00689522	-0.251809
4930553E22Rik	0	0	0	0	0	0	0	NA	NA	NA	NA	NA	0	0
4930554C24Rik	0	0	0	0	0	0	0	NA	NA	NA	NA	NA	0	0
4930555B11Rik	2.94448	2.94584	2.945	2.94452	3.1495	2.94489	8.88123	-1.66617	3.96342	-0.420388	0.674202	NA	0.0835108	2.97904
4930555G01Rik	0.985818	0.975836	0.975672	0.983271	0.97569	1.00327	1.98259	-0.906569	3.87505	-0.23395	0.815024	NA	0.0107407	0.983259
4930555I21Rik	1.55407	1.53914	1.55261	1.56905	1.53893	1.54687	2.92419	0.204745	3.86454	0.0529805	0.957747	NA	0.011283	1.55011
4930556C24Rik	0.995787	0.996053	0.995887	1.02601	0.995905	1.01174	2.01296	-3.97117	3.92388	-1.01205	0.311513	NA	0.0126909	1.00356
4930556G01Rik	-0.947584	-0.946202	-0.947374	-0.940059	-0.947201	-0.947572	0.412503	-1.06265	3.99094	-0.266266	0.790034	NA	0.00295464	-0.945999
4930556J02Rik	0	0	0	0	0	0	0	NA	NA	NA	NA	NA	0	0
4930556M19Rik	6.01582	6.1287	5.98692	6.00843	6.138	5.9826	66.9301	0.0167601	0.795179	0.0210772	0.983184	0.993836	0.0708455	6.04341
4930556N09Rik	0	0	0	0	0	0	0	NA	NA	NA	NA	NA	0	0
4930557A04Rik	-1.25165	-1.25011	-1.2511	-1.25165	-1.25095	-1.24589	0.346473	-0.991849	4.04905	-0.244959	0.806489	NA	0.00219631	-1.25022
4930557J02Rik	0	0	0	0	0	0	0	NA	NA	NA	NA	NA	0	0
4930558C23Rik	0	0	0	0	0	0	0	NA	NA	NA	NA	NA	0	0
4930558G05Rik	0	0	0	0	0	0	0	NA	NA	NA	NA	NA	0	0
4930558J18Rik	5.14957	5.03842	5.08029	5.28501	5.22342	5.28992	37.6839	-3.05922	1.4996	-2.04002	0.0413479	0.181133	0.105715	5.17777
4930558K02Rik	-1.2405	-1.23889	-1.23705	-1.2405	-1.23979	-1.23725	0.372507	0.307221	4.02003	0.0764225	0.939083	NA	0.00154957	-1.239
4930562C15Rik	3.58714	3.59677	3.52776	3.54045	3.51379	3.58828	11.9978	1.57865	2.24017	0.7047	0.480997	NA	0.0358883	3.55903
4930562F07Rik	7.38076	6.8769	7.52568	7.3123	7.01406	7.71727	174.554	-0.391465	0.585329	-0.668794	0.503627	0.738628	0.313807	7.3045
4930563D23Rik	0	0	0	0	0	0	0	NA	NA	NA	NA	NA	0	0
4930563E18Rik	-0.421241	-0.41989	-0.421209	-0.421239	-0.421204	-0.406687	0.692945	-1.17386	4.01144	-0.292629	0.769806	NA	0.00584993	-0.418578
4930563E22Rik	6.37294	7.11943	6.45534	6.51422	6.63661	6.81165	113.932	-0.474379	0.873378	-0.543154	0.587024	0.791855	0.275589	6.6517
4930563F08Rik	4.85235	4.96299	4.79285	4.73747	4.8055	4.83745	29.5407	1.39705	1.3161	1.06151	0.28846	0.562002	0.0758569	4.83144
4930563M20Rik	-1.66921	-1.66993	-1.67035	-1.67065	-1.67029	-1.67043	0.146644	1.55913	4.0456	0.385388	0.69995	NA	0.000512965	-1.67014
4930564B18Rik	0	0	0	0	0	0	0	NA	NA	NA	NA	NA	0	0
4930564D02Rik	0	0	0	0	0	0	0	NA	NA	NA	NA	NA	0	0
4930564G21Rik	0	0	0	0	0	0	0	NA	NA	NA	NA	NA	0	0
4930564K09Rik	3.93367	3.84727	4.0073	3.9009	3.85138	3.87821	15.4588	0.780509	1.85481	0.420802	0.6739	0.846283	0.0603463	3.90312
4930565A17	0	0	0	0	0	0	0	NA	NA	NA	NA	NA	0	0
4930565D16Rik	0	0	0	0	0	0	0	NA	NA	NA	NA	NA	0	0
4930565N06Rik	2.87553	2.85352	2.85736	2.86056	2.88403	2.89842	7.34914	-1.08042	2.07649	-0.520313	0.602845	NA	0.0175552	2.87157
4930567H12Rik	0	0	0	0	0	0	0	NA	NA	NA	NA	NA	0	0
4930567H17Rik	0	0	0	0	0	0	0	NA	NA	NA	NA	NA	0	0
4930567J20Rik	0	0	0	0	0	0	0	NA	NA	NA	NA	NA	0	0
4930567K20Rik	0	0	0	0	0	0	0	NA	NA	NA	NA	NA	0	0
4930568D16Rik	0	0	0	0	0	0	0	NA	NA	NA	NA	NA	0	0
4930568E12Rik	0	0	0	0	0	0	0	NA	NA	NA	NA	NA	0	0
4930568G15Rik	0	0	0	0	0	0	0	NA	NA	NA	NA	NA	0	0
4930568K20Rik	1.31883	1.31916	1.35952	1.33231	1.31898	1.32296	2.54417	0.219112	3.8633	0.0567163	0.954771	NA	0.0159909	1.32862
4930570G19Rik	2.7981	2.79558	2.80426	2.85293	2.79505	2.88653	7.26038	-2.50809	2.79507	-0.897326	0.369545	NA	0.0385527	2.82207
4930571K23Rik	0	0	0	0	0	0	0	NA	NA	NA	NA	NA	0	0
4930572J05Rik	5.95075	6.18323	6.03729	6.13782	6.35134	6.22892	74.2712	-1.31913	0.801333	-1.64617	0.099728	0.312308	0.141708	6.14822
4930572K03Rik	0	0	0	0	0	0	0	NA	NA	NA	NA	NA	0	0
4930572O13Rik	-0.735394	-0.73388	-0.73535	-0.735392	-0.735133	-0.724819	0.519709	-1.12718	4.02784	-0.279847	0.779595	NA	0.00420923	-0.733328
4930573O16Rik	0	0	0	0	0	0	0	NA	NA	NA	NA	NA	0	0
4930578C19Rik	0	0	0	0	0	0	0	NA	NA	NA	NA	NA	0	0
4930578E11Rik	1.73127	1.68992	1.69882	1.6991	1.69987	1.69363	3.26139	0.318652	3.21438	0.0991332	0.921033	NA	0.014806	1.7021
4930578I06Rik	-2.01158	-2.01162	-2.01183	-2.01208	-2.0118	-2.01187	0.073322	1.16606	4.06331	0.286973	0.774133	NA	0.000182565	-2.0118
4930578M01Rik	2.91585	2.91515	2.93762	2.9393	3.03021	2.9266	7.99063	-3.37533	2.51414	-1.34254	0.179422	NA	0.0434105	2.94412
4930578N16Rik	5.23024	5.14317	5.31476	5.28547	5.36745	5.41673	40.5321	-2.02144	1.43819	-1.40554	0.15986	0.408441	0.0977452	5.29297
4930578N18Rik	0	0	0	0	0	0	0	NA	NA	NA	NA	NA	0	0
4930579C15Rik	0.449297	0.44948	0.467589	0.46271	0.449378	0.449352	1.37459	0.722541	3.88715	0.185879	0.852539	NA	0.00829002	0.454634
4930579F01Rik	0	0	0	0	0	0	0	NA	NA	NA	NA	NA	0	0
4930579G18Rik	4.94169	5.24742	4.94094	4.93187	4.83901	4.91969	34.6455	1.79429	1.70577	1.0519	0.292847	0.565185	0.141244	4.9701
4930579G22Rik	3.46814	3.37599	3.41619	3.4092	3.38038	3.44523	10.7981	-0.182625	2.09122	-0.0873296	0.93041	NA	0.0360244	3.41586
4930579G24Rik	9.22928	9.66826	9.93451	9.39185	9.74634	10.1958	873.293	-0.262717	0.269523	-0.974747	0.329686	0.600624	0.352224	9.69434
4930579K19Rik	5.84141	6.01303	5.95207	6.0614	6.1322	6.0215	65.7893	-1.06221	0.864161	-1.22918	0.219003	0.484964	0.0992469	6.0036
4930581F22Rik	5.74494	5.81898	5.66467	5.73501	5.72438	5.7403	53.8401	0.0100557	0.915933	0.0109786	0.991241	0.996795	0.0493636	5.73805
4930583H14Rik	8.43464	9.06465	8.68953	8.88755	8.98722	9.32115	501.874	-0.654713	0.41839	-1.56484	0.11762	0.343032	0.307592	8.89746
4930583K01Rik	-0.735394	-0.73388	-0.73535	-0.735392	-0.735133	-0.724819	0.519709	-1.12718	4.02784	-0.279847	0.779595	NA	0.00420923	-0.733328
4930583P06Rik	0	0	0	0	0	0	0	NA	NA	NA	NA	NA	0	0
4930584F24Rik	0	0	0	0	0	0	0	NA	NA	NA	NA	NA	0	0
4930588N13Rik	1.91472	1.90319	1.96096	1.90269	1.90805	1.91489	3.84551	2.19141	3.61179	0.606739	0.544024	NA	0.0219865	1.91742
4930590J08Rik	-1.95198	-1.9509	-1.95139	-1.95198	-1.95132	-1.95013	0.173236	-0.582649	4.07006	-0.143155	0.886168	NA	0.000701779	-1.95128
4930590L20Rik	-1.14649	-1.14518	-1.14615	-1.14367	-1.146	-1.1437	0.338238	-1.7756	4.02258	-0.441409	0.658917	NA	0.00125025	-1.1452
4930591A17Rik	0	0	0	0	0	0	0	NA	NA	NA	NA	NA	0	0
4930592A05Rik	4.05507	4.15297	4.03683	4.03749	3.99647	4.01833	17.1245	1.57515	1.58385	0.994512	0.319974	0.59179	0.0544555	4.04953
4930592I03Rik	0	0	0	0	0	0	0	NA	NA	NA	NA	NA	0	0
4930593A02Rik	-0.297729	-0.296483	-0.297694	-0.288878	-0.297687	-0.290325	0.758976	-2.80152	3.96931	-0.705795	0.480316	NA	0.00407934	-0.294799
4930593C16Rik	-1.95198	-1.9509	-1.95139	-1.95198	-1.95132	-1.95013	0.173236	-0.582649	4.07006	-0.143155	0.886168	NA	0.000701779	-1.95128
4930594C11Rik	2.42634	2.41671	2.43467	2.43909	2.46154	2.44412	5.43795	-2.07128	2.6354	-0.785944	0.431901	NA	0.0154132	2.43708
4930595M18Rik	0	0	0	0	0	0	0	NA	NA	NA	NA	NA	0	0
4930596D02Rik	0	0	0	0	0	0	0	NA	NA	NA	NA	NA	0	0
4930596M17Rik	0	0	0	0	0	0	0	NA	NA	NA	NA	NA	0	0
4930597G03Rik	0	0	0	0	0	0	0	NA	NA	NA	NA	NA	0	0
4930598F16Rik	0	0	0	0	0	0	0	NA	NA	NA	NA	NA	0	0
4930599N23Rik	4.64315	4.63046	4.52954	4.52087	4.50084	4.52964	24.1955	1.45714	1.3168	1.10658	0.268474	0.542033	0.0612453	4.55908
4931402G19Rik	4.79372	5.21411	4.77782	4.78409	4.79541	4.77116	33.8835	1.17312	1.24652	0.941115	0.346646	0.616573	0.175653	4.85605
4931403E22Rik	-1.95984	-1.95933	-1.95956	-1.95921	-1.95953	-1.95961	0.0825007	-0.610711	4.07451	-0.149886	0.880855	NA	0.000223648	-1.95951
4931403G20Rik	3.38025	3.34898	3.40265	3.37477	3.45081	3.37225	10.6414	-0.769756	2.22181	-0.346454	0.729002	NA	0.0351123	3.38828
4931406B18Rik	5.98009	6.07262	5.94885	6.07402	6.2193	5.97965	67.7707	-0.570541	0.798838	-0.714213	0.475096	0.717838	0.0997089	6.04575
4931406C07Rik	6.5208	6.34014	6.57378	6.47323	6.95059	6.75021	104.892	-1.14286	0.892983	-1.27982	0.200607	0.462286	0.217267	6.60146
4931406H21Rik	8.35112	8.29674	8.70237	8.50323	8.4826	8.49153	359.542	-0.108604	0.422347	-0.257145	0.797067	0.90713	0.141326	8.47126
4931406P16Rik	13.4844	12.3173	13.0305	12.3982	11.9079	12.281	6709.15	0.895748	0.214287	4.18014	2.91e-05	0.0007814	0.576785	12.5699
4931407G18Rik	0	0	0	0	0	0	0	NA	NA	NA	NA	NA	0	0
4931408A02Rik	7.67922	6.93193	7.81944	7.94994	8.34276	7.93514	255.178	-2.00992	1.16839	-1.72025	0.0853866	0.283996	0.469149	7.77641
4931408C20Rik	0	0	0	0	0	0	0	NA	NA	NA	NA	NA	0	0
4931408D14Rik	-1.45119	-1.44982	-1.44842	-1.44967	-1.4505	-1.45078	0.281771	0.43886	4.05948	0.108108	0.91391	NA	0.000987032	-1.45006
4931409K22Rik	0	0	0	0	0	0	0	NA	NA	NA	NA	NA	0	0
4931414P19Rik	4.53786	4.44018	4.53314	4.55478	4.51953	4.5688	23.2241	-1.52239	1.63973	-0.928441	0.353179	0.621861	0.045294	4.52571
4931417E11Rik	0	0	0	0	0	0	0	NA	NA	NA	NA	NA	0	0
4931417G12Rik	3.36942	3.43225	3.32577	3.30847	3.30707	3.33536	10.6032	4.35124	2.36273	1.84161	0.0655315	NA	0.0478195	3.34639
4931419H13Rik	-1.95198	-1.9509	-1.95139	-1.95198	-1.95132	-1.95013	0.173236	-0.582649	4.07006	-0.143155	0.886168	NA	0.000701779	-1.95128
4931420L22Rik	0	0	0	0	0	0	0	NA	NA	NA	NA	NA	0	0
4931423N10Rik	-0.470172	-0.468812	-0.470143	-0.456467	-0.470138	-0.470149	0.660005	-1.10255	3.97688	-0.277239	0.781596	NA	0.00550304	-0.467647
4931428F04Rik	7.347	6.6246	7.19718	7.36505	7.10181	7.37363	155.942	-1.66529	1.10099	-1.51254	0.130395	0.363631	0.287634	7.16821
4931428L18Rik	1.39551	1.37053	1.37947	1.38359	1.37034	1.38224	2.59558	0.473827	3.86555	0.122577	0.902442	NA	0.00939503	1.38028
4931429I11Rik	0.976886	0.975437	0.975274	1.01087	0.975291	0.983221	1.98731	-2.38815	3.9203	-0.609177	0.542407	NA	0.0140718	0.982829
4931429L15Rik	0.720511	0.712184	0.725754	0.719661	0.712062	0.720027	1.6409	0.597668	3.8755	0.154217	0.877439	NA	0.00532115	0.718366
4931429P17Rik	0	0	0	0	0	0	0	NA	NA	NA	NA	NA	0	0
4931430N09Rik	2.04745	2.04801	2.0972	2.04746	2.0477	2.0948	4.27081	0.25724	3.9573	0.0650039	0.948171	NA	0.0249781	2.06377
4931431B13Rik	0	0	0	0	0	0	0	NA	NA	NA	NA	NA	0	0
4931431C16Rik	4.39925	4.61253	4.44303	4.40873	4.35603	4.4442	23.1399	1.38783	1.87094	0.741784	0.458218	0.706307	0.0887588	4.44396
4931431F19Rik	0	0	0	0	0	0	0	NA	NA	NA	NA	NA	0	0
4931440F15Rik	0.0844513	0.0834779	0.100619	0.0827783	0.0828349	0.0867306	1.04364	1.81825	3.96872	0.458145	0.646848	NA	0.0069197	0.0868153
4931440J10Rik	-0.99398	-0.996518	-0.997635	-0.997846	-0.99747	-0.994811	0.393202	0.871419	4.00089	0.217806	0.82758	NA	0.00162185	-0.996377
4931440L10Rik	-1.25165	-1.25011	-1.2511	-1.25165	-1.25095	-1.24589	0.346473	-0.991849	4.04905	-0.244959	0.806489	NA	0.00219631	-1.25022
4931440P22Rik	6.15773	6.28542	6.03275	6.23008	5.94552	6.34019	75.3936	0.0793476	1.10125	0.0720523	0.94256	0.976164	0.15175	6.16528
4932411E22Rik	1.60288	1.55512	1.55487	1.55473	1.5549	1.57465	2.99252	0.929397	3.86167	0.240672	0.809809	NA	0.0196331	1.56619
4932411G14Rik	0	0	0	0	0	0	0	NA	NA	NA	NA	NA	0	0
4932411L15	9.88742	10.6449	9.90001	9.53984	9.65982	10.0091	1048.69	0.603749	0.375132	1.60943	0.107522	0.325024	0.385927	9.94019
4932411N23Rik	0.901957	0.914037	0.909005	0.895026	0.895133	0.899159	1.89263	3.52048	3.92716	0.896444	0.370016	NA	0.00770626	0.902386
4932412D23Rik	0	0	0	0	0	0	0	NA	NA	NA	NA	NA	0	0
4932412H11Rik	2.10864	2.10923	2.10886	2.10866	2.20604	2.11288	4.61385	-2.75011	3.96444	-0.693694	0.487874	NA	0.0393846	2.12572
4932413F04Rik	0	0	0	0	0	0	0	NA	NA	NA	NA	NA	0	0
4932414J04Rik	0	0	0	0	0	0	0	NA	NA	NA	NA	NA	0	0
4932414N04Rik	1.51825	1.50326	1.50302	1.51825	1.53822	1.50299	2.87412	-1.3574	3.89137	-0.348822	0.727223	NA	0.0139991	1.514
4932415G12Rik	8.67504	7.18511	8.73168	9.03223	8.62681	9.02166	452.767	-2.13055	1.99416	-1.06839	0.285344	0.559659	0.688817	8.54542
4932415M13Rik	0	0	0	0	0	0	0	NA	NA	NA	NA	NA	0	0
4932416H05Rik	8.0903	7.79609	8.04774	8.10439	7.83505	7.79655	250.837	0.174152	0.47628	0.365651	0.714625	0.867097	0.150581	7.94502
4932416K20Rik	0	0	0	0	0	0	0	NA	NA	NA	NA	NA	0	0
4932418E24Rik	1.15052	1.15082	1.18241	1.15052	1.15065	1.17056	2.26107	0.484279	3.9633	0.122191	0.902748	NA	0.0138697	1.15925
4932425I24Rik	4.51362	4.41591	4.534	4.49872	4.47576	4.56198	22.9127	-1.18524	1.63957	-0.722897	0.469743	0.714224	0.0506813	4.5
4932429P05Rik	0	0	0	0	0	0	0	NA	NA	NA	NA	NA	0	0
4932435O22Rik	2.51079	2.50983	2.53237	2.52459	2.5788	2.53335	5.87753	-3.01372	2.67018	-1.12865	0.259043	NA	0.0252474	2.53162
4932438A13Rik	12.5221	11.504	12.3048	12.3388	11.9676	12.2488	4696.74	-0.0921917	0.227145	-0.405871	0.684837	0.851597	0.362854	12.1477
4932438H23Rik	8.84647	9.23628	9.09182	8.88462	9.38604	9.25686	568.933	-0.206639	0.315194	-0.655592	0.512087	0.743589	0.216328	9.11702
4932441B19Rik	0	0	0	0	0	0	0	NA	NA	NA	NA	NA	0	0
4932441J04Rik	0	0	0	0	0	0	0	NA	NA	NA	NA	NA	0	0
4932443I19Rik	0	0	0	0	0	0	0	NA	NA	NA	NA	NA	0	0
4932702P03Rik	0	0	0	0	0	0	0	NA	NA	NA	NA	NA	0	0
4933400A11Rik	0	0	0	0	0	0	0	NA	NA	NA	NA	NA	0	0
4933400B14Rik	0	0	0	0	0	0	0	NA	NA	NA	NA	NA	0	0
4933400C05Rik	2.81744	2.79769	2.8202	2.79675	2.91712	2.79701	7.42698	3.95175	3.73675	1.05754	0.290267	NA	0.0466714	2.82437
4933400C23	-1.03653	-1.04154	-1.04258	-1.04286	-1.04243	-1.04278	0.36661	2.02673	4.0234	0.503734	0.614448	NA	0.00245809	-1.04145
4933400F21Rik	0.178487	0.16567	0.165205	0.165154	0.165214	0.176905	1.10628	0.87158	3.89422	0.223814	0.822902	NA	0.00641799	0.169439
4933400L20Rik	0	0	0	0	0	0	0	NA	NA	NA	NA	NA	0	0
4933401B06Rik	0	0	0	0	0	0	0	NA	NA	NA	NA	NA	0	0
4933401D09Rik	2.32361	2.30201	2.30158	2.30135	2.37086	2.32554	5.10104	-3.63452	3.85881	-0.941877	0.346256	NA	0.0269703	2.32082
4933401H06Rik	0	0	0	0	0	0	0	NA	NA	NA	NA	NA	0	0
4933401P06Rik	0	0	0	0	0	0	0	NA	NA	NA	NA	NA	0	0
4933402C06Rik	0	0	0	0	0	0	0	NA	NA	NA	NA	NA	0	0
4933402D24Rik	-1.95198	-1.9509	-1.95139	-1.95198	-1.95132	-1.95013	0.173236	-0.582649	4.07006	-0.143155	0.886168	NA	0.000701779	-1.95128
4933402E13Rik	0	0	0	0	0	0	0	NA	NA	NA	NA	NA	0	0
4933402J07Rik	0	0	0	0	0	0	0	NA	NA	NA	NA	NA	0	0
4933402J10Rik	0	0	0	0	0	0	0	NA	NA	NA	NA	NA	0	0
4933402J15Rik	0	0	0	0	0	0	0	NA	NA	NA	NA	NA	0	0
4933402N03Rik	0	0	0	0	0	0	0	NA	NA	NA	NA	NA	0	0
4933402N22Rik	1.3323	1.33264	1.33243	1.33231	1.38728	1.33645	2.61558	-2.64897	3.99252	-0.663484	0.50702	NA	0.0221285	1.34224
4933402P03Rik	0	0	0	0	0	0	0	NA	NA	NA	NA	NA	0	0
4933403F05Rik	12.1352	11.6841	12.13	11.9785	11.9521	11.9343	4039.89	0.0353456	0.209457	0.168748	0.865994	0.94136	0.16509	11.969
4933403G14Rik	9.00728	8.31544	9.10951	8.92185	8.82281	9.12402	493.113	-0.310334	0.41835	-0.741805	0.458206	0.706307	0.300699	8.88348
4933403O08Rik	0	0	0	0	0	0	0	NA	NA	NA	NA	NA	0	0
4933404G15Rik	0	0	0	0	0	0	0	NA	NA	NA	NA	NA	0	0
4933404K08Rik	2.96218	2.93919	2.95702	2.98012	2.99855	2.9743	7.8621	-2.07641	2.32894	-0.891568	0.372625	NA	0.0205052	2.96856
4933404M02Rik	5.69706	6.21975	5.80154	5.69295	5.65396	5.7947	63.5498	1.08725	1.06111	1.02463	0.305537	0.577279	0.209286	5.80999
4933404O12Rik	7.21798	6.85682	7.16696	7.26999	6.84633	7.03623	139.374	0.118539	0.599213	0.197824	0.843183	0.930994	0.183198	7.06572
4933405D12Rik	3.66249	3.6147	3.72746	3.6479	3.67434	3.64578	12.8426	-0.272484	2.07808	-0.131123	0.895678	NA	0.0377773	3.66211
4933405E24Rik	4.42486	4.40322	4.42962	4.53184	4.59843	4.53213	23.295	-3.45483	1.60407	-2.15379	0.0312566	0.152203	0.0782784	4.48668
4933405L10Rik	0.71608	0.716303	0.734465	0.716086	0.716179	0.736065	1.66326	0.185821	3.96712	0.0468402	0.962641	NA	0.00987797	0.72253
4933405O20Rik	0	0	0	0	0	0	0	NA	NA	NA	NA	NA	0	0
4933406C10Rik	1.16495	1.14162	1.14144	1.15282	1.14146	1.15729	2.21446	-0.558103	3.88229	-0.143756	0.885693	NA	0.0100101	1.14993
4933406D12Rik	0	0	0	0	0	0	0	NA	NA	NA	NA	NA	0	0
4933406F09Rik	0	0	0	0	0	0	0	NA	NA	NA	NA	NA	0	0
4933406G16Rik	0	0	0	0	0	0	0	NA	NA	NA	NA	NA	0	0
4933406I18Rik	3.93579	4.07886	3.86745	3.8971	3.86252	3.90541	16.2799	1.33135	2.19527	0.606464	0.544207	0.764157	0.080206	3.92452
4933406J08Rik	0	0	0	0	0	0	0	NA	NA	NA	NA	NA	0	0
4933406J10Rik	3.82153	4.20583	3.80265	3.80406	3.80287	3.8024	18.5508	3.66836	2.55723	1.43451	0.151427	0.395776	0.163112	3.87323
4933406K04Rik	0	0	0	0	0	0	0	NA	NA	NA	NA	NA	0	0
4933406M09Rik	5.73713	6.0564	5.63165	5.74542	5.89023	5.78185	59.7625	-0.425169	0.998265	-0.425908	0.670175	0.844226	0.147771	5.80712
4933407C03Rik	13.3221	14.0821	13.2892	13.4134	13.2152	12.7957	10998.4	0.497789	0.243762	2.04211	0.0411405	0.180742	0.417087	13.3529
4933407E24Rik	0	0	0	0	0	0	0	NA	NA	NA	NA	NA	0	0
4933407G14Rik	-0.497838	-0.496452	-0.489584	-0.49266	-0.497804	-0.497815	0.646042	0.625074	3.94152	0.158587	0.873994	NA	0.00346332	-0.495359
4933407H18Rik	9.52378	9.60948	9.49216	9.2904	8.63188	9.09741	655.896	0.929691	0.396201	2.34651	0.01895	0.109857	0.365049	9.27419
4933407I05Rik	0	0	0	0	0	0	0	NA	NA	NA	NA	NA	0	0
4933407K13Rik	7.02879	6.37635	6.93021	6.80481	6.60646	7.18015	125.924	-1.28373	1.09387	-1.17357	0.240568	0.51135	0.292608	6.82113
4933407L21Rik	3.83635	4.09456	3.83667	3.83049	3.92045	3.84948	16.675	1.34149	1.93662	0.692694	0.488502	0.72753	0.103488	3.89467
4933407P14Rik	0	0	0	0	0	0	0	NA	NA	NA	NA	NA	0	0
4933408B17Rik	2.90064	3.04264	2.91053	2.90067	2.90112	2.92957	8.23757	0.903603	3.46764	0.260582	0.794415	NA	0.0558915	2.93086
4933408J17Rik	3.70124	3.82863	3.7234	3.73589	3.74256	3.69419	13.8143	0.700506	1.70217	0.411536	0.680679	0.849738	0.0484184	3.73765
4933408N05Rik	6.01181	6.20647	5.94307	6.19067	6.10458	6.01194	69.526	-0.446918	0.85402	-0.52331	0.600758	0.801146	0.106636	6.07809
4933409G03Rik	-1.25165	-1.25011	-1.2511	-1.25165	-1.25095	-1.24589	0.346473	-0.991849	4.04905	-0.244959	0.806489	NA	0.00219631	-1.25022
4933409K07Rik	2.35194	2.33476	2.32494	2.36086	2.36525	2.32893	5.1043	-1.53531	2.72704	-0.562995	0.573439	NA	0.0171666	2.34445
4933411E08Rik	3.02337	2.97723	3.00406	3.02723	2.99203	3.01995	8.04785	-1.2051	2.27987	-0.528583	0.597095	NA	0.0198161	3.00731
4933411G06Rik	0	0	0	0	0	0	0	NA	NA	NA	NA	NA	0	0
4933411G11Rik	-1.95198	-1.9509	-1.95139	-1.95198	-1.95132	-1.95013	0.173236	-0.582649	4.07006	-0.143155	0.886168	NA	0.000701779	-1.95128
4933411K16Rik	-0.421241	-0.41989	-0.421209	-0.421239	-0.421204	-0.406687	0.692945	-1.17386	4.01144	-0.292629	0.769806	NA	0.00584993	-0.418578
4933411K20Rik	9.52869	9.71234	9.52362	9.3391	9.5879	9.68594	762.678	0.0854714	0.303911	0.281238	0.778528	0.900004	0.13483	9.56293
4933412E12Rik	4.23985	4.12972	4.32086	4.12727	4.1797	4.19194	19.1444	1.73212	2.4233	0.714778	0.474746	0.71765	0.0733257	4.19823
4933412E24Rik	0	0	0	0	0	0	0	NA	NA	NA	NA	NA	0	0
4933412O06Rik	6.80487	6.4697	6.78437	7.02592	7.24912	7.13799	132.853	-2.2536	0.961902	-2.34286	0.0191366	0.110381	0.28323	6.912
4933413G19Rik	-0.632223	-0.630847	-0.632199	-0.620788	-0.632194	-0.632204	0.577505	-1.09265	3.98032	-0.274513	0.78369	NA	0.00458246	-0.630076
4933413J09Rik	1.42765	1.42802	1.42779	1.42766	1.48266	1.43584	2.78881	-2.96403	3.98362	-0.744055	0.456843	NA	0.0219819	1.43827
4933413L06Rik	-0.816784	-0.821103	-0.822425	-0.822586	-0.82223	-0.819168	0.466524	0.955737	3.98514	0.239825	0.810466	NA	0.00231157	-0.820716
4933415F23Rik	0	0	0	0	0	0	0	NA	NA	NA	NA	NA	0	0
4933416C03Rik	0	0	0	0	0	0	0	NA	NA	NA	NA	NA	0	0
4933416E03Rik	1.76928	1.75437	1.7587	1.76547	1.75411	1.80094	3.43301	-0.555464	3.7199	-0.149322	0.881299	NA	0.0176286	1.76715
4933416I08Rik	0	0	0	0	0	0	0	NA	NA	NA	NA	NA	0	0
4933416M06Rik	0	0	0	0	0	0	0	NA	NA	NA	NA	NA	0	0
4933416M07Rik	3.49021	3.48085	3.51872	3.49779	3.66163	3.50953	12.2044	-1.69964	2.13853	-0.794771	0.426746	NA	0.0675769	3.52646
4933417A18Rik	0	0	0	0	0	0	0	NA	NA	NA	NA	NA	0	0
4933417D19Rik	2.60935	2.60498	2.6585	2.61775	2.60452	2.67427	6.30697	-0.382901	2.88492	-0.132725	0.894411	NA	0.0303455	2.62823
4933417E11Rik	7.70811	7.63259	7.65014	8.08446	8.76328	8.00845	292.822	-1.47778	0.53618	-2.75613	0.00584898	0.0483931	0.430926	7.97451
4933417G07Rik	-1.59582	-1.59501	-1.59548	-1.594	-1.59541	-1.59557	0.165001	-0.935355	4.03964	-0.231544	0.816892	NA	0.000651238	-1.59522
4933417O13Rik	0	0	0	0	0	0	0	NA	NA	NA	NA	NA	0	0
4933421E11Rik	10.576	10.5402	10.7325	10.6203	11.1531	10.9116	1763.6	-0.373206	0.258763	-1.44227	0.149226	0.392054	0.236581	10.7556
4933421I07Rik	0	0	0	0	0	0	0	NA	NA	NA	NA	NA	0	0
4933421O10Rik	9.69628	9.3776	9.50257	9.47432	9.41879	9.71651	746.506	-0.0177084	0.314824	-0.0562485	0.955144	0.980675	0.142742	9.53101
4933422A05Rik	0.965376	0.953734	0.953573	0.974372	0.953591	0.965478	1.94047	-1.37133	3.91939	-0.349883	0.726426	NA	0.00872745	0.961021
4933422H20Rik	1.18693	1.18725	1.18705	1.18694	1.2322	1.1951	2.34475	-2.8514	3.98504	-0.715525	0.474284	NA	0.0180671	1.19591
4933424B01Rik	11.8384	11.6025	11.7485	11.4852	11.5511	11.6365	3216.18	0.21766	0.195647	1.11251	0.265917	0.539174	0.129869	11.6437
4933424G05Rik	-0.765623	-0.764255	-0.765602	-0.762477	-0.765489	-0.759075	0.511474	-2.15497	4.00119	-0.538581	0.590176	NA	0.0025959	-0.763753
4933424G06Rik	4.03903	3.98652	4.06625	4.07803	4.0559	4.06366	16.6314	-1.57856	1.83116	-0.862055	0.388657	0.65177	0.0328734	4.04823
4933425B07Rik	-1.95198	-1.9509	-1.95139	-1.95198	-1.95132	-1.95013	0.173236	-0.582649	4.07006	-0.143155	0.886168	NA	0.000701779	-1.95128
4933425H06Rik	3.86968	3.82812	3.90323	3.82591	4.03145	3.86087	15.6592	1.11185	2.59699	0.42813	0.668556	0.843505	0.076565	3.88654
4933425L06Rik	0	0	0	0	0	0	0	NA	NA	NA	NA	NA	0	0
4933425O20Rik	0	0	0	0	0	0	0	NA	NA	NA	NA	NA	0	0
4933426D04Rik	1.71304	1.70322	1.71667	1.74233	1.70298	1.71489	3.28997	-0.313356	3.7107	-0.0844466	0.932701	NA	0.0143888	1.71552
4933426M11Rik	12.3513	11.4604	12.3885	12.0474	11.5133	11.9763	4154.99	0.271658	0.204891	1.32587	0.184884	0.442916	0.398423	11.9562
4933427D06Rik	-0.56063	-0.560744	-0.558065	-0.558748	-0.562108	-0.55859	0.61083	-0.043106	3.94058	-0.010939	0.991272	NA	0.0015802	-0.559814
4933427D14Rik	8.6016	9.07585	8.59043	8.91904	7.98247	8.67571	431.01	0.469193	0.62152	0.754913	0.450301	0.700809	0.3756	8.64085
4933427E11Rik	3.72716	3.67627	3.67515	3.8031	3.74535	3.72668	13.491	-4.32652	2.51188	-1.72243	0.0849925	0.283327	0.0477034	3.72562
4933427E13Rik	0	0	0	0	0	0	0	NA	NA	NA	NA	NA	0	0
4933427G17Rik	2.74321	2.74414	2.76659	2.77208	2.77916	2.81345	6.90633	-4.32811	2.97326	-1.45568	0.145482	NA	0.0259777	2.76977
4933427I22Rik	-1.95219	-1.95095	-1.94996	-1.95219	-1.95143	-1.95163	0.19927	1.18861	4.06753	0.292218	0.77012	NA	0.000847694	-1.95139
4933428C19Rik	0	0	0	0	0	0	0	NA	NA	NA	NA	NA	0	0
4933429K18Rik	0.335374	0.307113	0.307011	0.306954	0.307022	0.306999	1.24647	2.1856	3.97633	0.549654	0.582557	NA	0.0115754	0.311746
4933429O19Rik	-1.95198	-1.9509	-1.95139	-1.95198	-1.95132	-1.95013	0.173236	-0.582649	4.07006	-0.143155	0.886168	NA	0.000701779	-1.95128
4933430H15Rik	1.92408	1.9194	1.99838	1.92279	1.91912	1.91904	3.97183	2.28692	3.88327	0.588915	0.555918	NA	0.0317064	1.9338
4933430H16Rik	0	0	0	0	0	0	0	NA	NA	NA	NA	NA	0	0
4933430I17Rik	3.71737	3.62328	3.72369	3.62159	3.64303	3.69654	13.0155	0.740762	2.62752	0.281925	0.778001	NA	0.0470727	3.67092
4933430M04Rik	-1.95198	-1.9509	-1.95139	-1.95198	-1.95132	-1.95013	0.173236	-0.582649	4.07006	-0.143155	0.886168	NA	0.000701779	-1.95128
4933430N04Rik	0	0	0	0	0	0	0	NA	NA	NA	NA	NA	0	0
4933431E20Rik	7.79854	7.79803	7.80895	7.58024	7.38927	7.65328	209.167	0.789086	0.51444	1.53387	0.125061	0.355166	0.166947	7.67139
4933431G14Rik	0	0	0	0	0	0	0	NA	NA	NA	NA	NA	0	0
4933432B09Rik	5.20833	5.15402	5.20019	5.07772	5.05532	5.08205	35.7034	1.46068	1.04997	1.39116	0.164177	0.415102	0.0667039	5.1296
4933432G23Rik	0	0	0	0	0	0	0	NA	NA	NA	NA	NA	0	0
4933432I03Rik	0	0	0	0	0	0	0	NA	NA	NA	NA	NA	0	0
4933432I09Rik	1.73387	1.73086	1.74442	1.73042	1.77089	1.75056	3.38688	-0.563627	3.82293	-0.147433	0.88279	NA	0.0156488	1.7435
4933433C11Rik	0.878841	0.855428	0.873478	0.855192	0.855293	0.855258	1.82359	4.12026	3.96524	1.03909	0.298761	NA	0.0109086	0.862248
4933433F19Rik	0	0	0	0	0	0	0	NA	NA	NA	NA	NA	0	0
4933433G15Rik	2.22147	2.19489	2.21737	2.20396	2.19455	2.24149	4.66084	0.441918	3.25289	0.135854	0.891937	NA	0.0181643	2.21229
4933433G19Rik	2.65156	2.63009	2.63422	2.64477	2.70837	2.65355	6.40437	-2.46019	2.6071	-0.94365	0.345349	NA	0.0283211	2.65376
4933433H22Rik	4.58668	4.53953	4.62848	4.66483	4.70154	4.66862	25.2434	-2.24628	1.62678	-1.38081	0.167338	0.419367	0.0597852	4.63161
4933433P14Rik	9.83629	10.6023	10.079	10.1352	10.5538	10.3035	1259.34	-0.233465	0.255388	-0.914157	0.360634	0.626938	0.294237	10.2517
4933434E20Rik	10.5719	10.4432	10.3947	10.6488	10.9071	10.7789	1599.77	-0.424699	0.242773	-1.74936	0.0802281	0.273779	0.196317	10.6241
4933434I20Rik	0	0	0	0	0	0	0	NA	NA	NA	NA	NA	0	0
4933436C20Rik	7.16217	6.89755	7.30502	7.38343	7.62108	7.44046	168.178	-1.32948	0.717294	-1.85346	0.0638159	0.236942	0.249299	7.30162
4933436E23Rik	0	0	0	0	0	0	0	NA	NA	NA	NA	NA	0	0
4933436H12Rik	0	0	0	0	0	0	0	NA	NA	NA	NA	NA	0	0
4933436I01Rik	0	0	0	0	0	0	0	NA	NA	NA	NA	NA	0	0
4933437F05Rik	1.83534	1.79736	1.79707	1.83084	1.7971	1.80501	3.51789	-0.830979	3.92553	-0.211686	0.832352	NA	0.0178533	1.81045
4933438B17Rik	0	0	0	0	0	0	0	NA	NA	NA	NA	NA	0	0
4933438K21Rik	-1.20139	-1.20258	-1.20349	-1.20388	-1.20336	-1.20118	0.31988	0.783006	4.02924	0.194331	0.845917	NA	0.00113943	-1.20265
4933439C10Rik	7.72086	8.07147	7.70462	7.45199	7.35128	7.44531	211.798	1.20636	0.550795	2.19021	0.0285087	0.143324	0.265329	7.62426
4933439F18Rik	12.0693	10.8255	12.0163	11.9343	11.707	11.7818	3562.84	-0.212435	0.311605	-0.681746	0.4954	0.73282	0.460398	11.7224
4933439K11Rik	1.117	1.1173	1.12631	1.12664	1.11713	1.14866	2.19693	-1.9639	3.90974	-0.50231	0.615449	NA	0.0122302	1.12551
4933440J02Rik	2.20941	2.21005	2.21894	2.21722	2.29305	2.21771	4.84954	-3.80389	3.37144	-1.12827	0.259207	NA	0.0322573	2.22773
4933440M02Rik	0.653064	0.653274	0.653143	0.681375	0.653157	0.661091	1.58398	-3.21126	3.92298	-0.818575	0.413029	NA	0.011325	0.659184
5031410I06Rik	0.0705582	0.0712659	0.0706089	0.070562	0.0706179	0.0937278	1.03942	-1.22737	3.99352	-0.307341	0.758584	NA	0.00939582	0.0745568
5031414D18Rik	5.8453	6.37359	5.81586	5.83369	6.16767	5.82523	72.2684	0.259896	0.799612	0.325028	0.74516	0.883945	0.236862	5.97689
5031425E22Rik	10.4421	10.5566	10.6599	9.86357	9.50716	10.3543	1285.65	0.930345	0.310384	2.9974	0.00272292	0.0274384	0.449147	10.2306
5031425F14Rik	1.39705	1.39741	1.44659	1.39706	1.39721	1.40921	2.71168	0.980836	3.9632	0.247486	0.804532	NA	0.0197828	1.40742
5031426D15Rik	5.13435	5.18916	5.06055	5.07573	5.12629	5.0577	34.981	0.452622	1.06117	0.426532	0.66972	0.844226	0.0518389	5.1073
5031434C07Rik	5.55325	6.1906	5.47898	5.61983	5.52978	5.59352	61.8315	0.116644	1.2096	0.0964326	0.923177	0.967465	0.264074	5.66099
5031434O11Rik	3.33433	3.23761	3.29969	3.2461	3.23688	3.28802	9.85368	1.56375	2.49204	0.627499	0.530332	NA	0.039941	3.27377
5031439G07Rik	12.7358	12.3831	12.1222	12.0294	11.369	11.7578	4573.2	0.850771	0.223193	3.81182	0.000137949	0.0027733	0.476325	12.0662
5033403H07Rik	0	0	0	0	0	0	0	NA	NA	NA	NA	NA	0	0
5033404E19Rik	-1.95198	-1.9509	-1.95139	-1.95198	-1.95132	-1.95013	0.173236	-0.582649	4.07006	-0.143155	0.886168	NA	0.000701779	-1.95128
5033406O09Rik	6.94359	7.32487	6.94642	7.12709	7.10376	7.27598	143.967	-0.454426	0.687031	-0.661435	0.508334	0.741275	0.159915	7.12028
5033411D12Rik	6.39948	5.97006	6.33494	6.28071	6.26021	6.30154	79.5067	-1.05012	1.30659	-0.803713	0.421563	0.678319	0.149173	6.25782
5033414D02Rik	8.43015	8.64555	8.94014	8.82508	9.74074	9.51568	591.298	-1.21067	0.38172	-3.17161	0.00151597	0.0177262	0.509428	9.01622
5133401N09Rik	7.90336	8.80016	7.96835	7.64247	7.92008	7.85454	297.345	0.95203	0.507873	1.87454	0.0608556	0.229756	0.401161	8.01483
5330411J11Rik	0	0	0	0	0	0	0	NA	NA	NA	NA	NA	0	0
5330413P13Rik	0	0	0	0	0	0	0	NA	NA	NA	NA	NA	0	0
5330417C22Rik	3.89179	3.89417	4.1063	3.95278	3.95206	3.93522	16.414	-4.31704	2.48336	-1.73839	0.0821419	0.277941	0.0787274	3.95539
5330426P16Rik	7.65696	7.31665	7.61644	7.86739	7.99414	7.88521	222.071	-1.1441	0.572851	-1.9972	0.0458035	0.193026	0.245566	7.7228
5330434G04Rik	0	0	0	0	0	0	0	NA	NA	NA	NA	NA	0	0
5330437I02Rik	5.57856	5.44974	5.7084	5.61761	5.77321	5.71228	51.7896	-1.62801	1.43262	-1.13638	0.255796	0.527836	0.116725	5.63997
5330439B14Rik	0	0	0	0	0	0	0	NA	NA	NA	NA	NA	0	0
5430401F13Rik	0	0	0	0	0	0	0	NA	NA	NA	NA	NA	0	0
5430402E10Rik	0	0	0	0	0	0	0	NA	NA	NA	NA	NA	0	0
5430402O13Rik	1.24387	1.21225	1.22575	1.21195	1.21208	1.22002	2.3374	2.42974	3.88792	0.624946	0.532007	NA	0.0125275	1.22099
5430403N17	0.442395	0.442578	0.442464	0.4424	0.442476	0.474001	1.38589	-1.25741	3.98385	-0.315628	0.752285	NA	0.0128756	0.447719
5430405G05Rik	0.533973	0.534169	0.547806	0.533978	0.53406	0.553937	1.46399	0.0352835	3.96936	0.00888898	0.992908	NA	0.00890332	0.539654
5430405H02Rik	5.69581	5.83147	5.62638	5.65988	5.79744	5.70665	53.8787	-0.0958199	0.913032	-0.104947	0.916418	0.964451	0.0794525	5.7196
5430407P10Rik	11.5835	11.408	10.7759	10.4594	10.3591	10.2036	1992.69	1.2173	0.249185	4.88511	1.03e-06	4.59e-05	0.574503	10.7982
5430411K18Rik	10.6449	10.6718	10.6314	11.2554	9.93681	10.4843	1653.69	0.137946	0.372848	0.369979	0.711398	0.865421	0.422107	10.6041
5430416N02Rik	8.07338	9.57033	8.08861	8.85089	9.47811	8.39142	539.18	-0.696826	0.446396	-1.561	0.118523	0.34486	0.668837	8.74213
5430416O09Rik	3.64325	3.6587	3.67558	3.72948	3.70424	3.71683	13.0361	-2.32787	1.71172	-1.35996	0.173842	NA	0.0341507	3.68801
5430417L22Rik	8.2293	8.15731	8.60128	8.38121	8.5063	8.49183	343.145	-0.308702	0.436838	-0.706674	0.479769	0.721417	0.172313	8.39454
5430419D17Rik	3.7055	3.58751	3.62768	3.65378	3.64205	3.58633	12.6316	0.79608	2.57518	0.309136	0.757218	NA	0.0448154	3.63381
5430421F17Rik	5.44598	5.95163	5.41189	5.49988	5.61996	5.38885	54.2338	0.494716	0.985536	0.501977	0.615684	0.811177	0.211907	5.55303
5430421N21Rik	4.40931	4.93778	4.44774	4.40946	4.50267	4.42702	29.2585	1.66384	1.69147	0.983666	0.32528	0.596707	0.206469	4.52233
5430425J12Rik	0	0	0	0	0	0	0	NA	NA	NA	NA	NA	0	0
5430427M07Rik	-1.14649	-1.14518	-1.14615	-1.14367	-1.146	-1.1437	0.338238	-1.7756	4.02258	-0.441409	0.658917	NA	0.00125025	-1.1452
5430427O19Rik	-0.735914	-0.737394	-0.734884	-0.738852	-0.738646	-0.735396	0.51915	1.54485	3.98787	0.387389	0.698468	NA	0.00169598	-0.736848
5430428K19Rik	0.988979	0.963943	0.963781	0.963689	0.963798	0.983555	1.96601	0.879433	3.86836	0.22734	0.820159	NA	0.0117267	0.971291
5430434I15Rik	-1.95198	-1.9509	-1.95139	-1.95198	-1.95132	-1.95013	0.173236	-0.582649	4.07006	-0.143155	0.886168	NA	0.000701779	-1.95128
5430435G22Rik	11.2574	10.5682	10.8548	11.4138	11.2948	10.8953	2187.06	-0.402736	0.266155	-1.51317	0.130237	0.363559	0.325394	11.0474
5430437J10Rik	1.84504	1.84207	1.90413	1.84742	1.8418	1.85379	3.70364	0.868911	3.59443	0.241738	0.808983	NA	0.0241275	1.85571
5430437P03Rik	9.89435	10.7283	10.0527	10.3051	10.2514	10.362	1270.48	-0.130239	0.338553	-0.384692	0.700466	0.860056	0.285751	10.2656
5430440P10Rik	2.54682	2.64156	2.55595	2.54947	2.5419	2.55409	6.22312	1.41025	2.69015	0.524228	0.60012	NA	0.0378594	2.56497
5530400C23Rik	0	0	0	0	0	0	0	NA	NA	NA	NA	NA	0	0
5530401A14Rik	0	0	0	0	0	0	0	NA	NA	NA	NA	NA	0	0
5530601H04Rik	8.14198	7.80929	8.13608	8.05511	8.43642	8.24521	290.505	-0.524259	0.537157	-0.975988	0.32907	0.600014	0.207598	8.13735
5730403B10Rik	10.7901	10.4145	10.7997	10.5296	10.4036	10.4005	1525.51	0.310021	0.243358	1.27393	0.202689	0.465226	0.190951	10.5564
5730403I07Rik	1.41826	1.41178	1.41156	1.45808	1.41159	1.41951	2.70228	-1.83879	3.92541	-0.468433	0.639475	NA	0.01813	1.4218
5730405O15Rik	2.88278	2.84304	2.8609	2.85181	2.9024	2.88205	7.36605	-1.25584	2.49953	-0.502431	0.615364	NA	0.022351	2.8705
5730408K05Rik	5.01393	5.27075	5.00582	5.1067	5.11244	5.00707	35.8168	-0.0844357	1.14695	-0.0736178	0.941314	0.975582	0.103067	5.08612
5730409E04Rik	4.95057	4.70952	4.77207	4.85685	4.80824	4.78316	29.0185	-1.04965	1.59555	-0.657861	0.510628	0.742795	0.0826369	4.8134
5730412P04Rik	0	0	0	0	0	0	0	NA	NA	NA	NA	NA	0	0
5730416F02Rik	-1.47909	-1.47528	-1.48043	-1.48133	-1.48023	-1.4807	0.48747	2.00056	4.03994	0.495195	0.620462	NA	0.00219903	-1.47951
5730419I09Rik	11.1021	10.196	10.8557	10.9572	9.93021	10.8771	1724.16	0.177635	0.226152	0.785466	0.43218	0.686576	0.472621	10.6531
5730420D15Rik	3.93927	3.87034	3.91511	3.92953	3.99969	3.9092	15.4394	-1.21096	1.96361	-0.616702	0.537431	0.760527	0.0426811	3.92719
5730422E09Rik	-1.14649	-1.14518	-1.14615	-1.14367	-1.146	-1.1437	0.338238	-1.7756	4.02258	-0.441409	0.658917	NA	0.00125025	-1.1452
5730435O14Rik	0.97499	0.961613	0.96145	0.961358	0.961467	0.992928	1.97247	0.795928	3.87116	0.205605	0.8371	NA	0.0129239	0.968967
5730437N04Rik	10.0037	9.9895	10.1744	10.2985	10.6118	10.7546	1314.23	-0.709656	0.25037	-2.83443	0.0045908	0.0402851	0.317405	10.3054
5730455O13Rik	8.27389	8.67377	8.18232	8.28097	8.82003	8.37036	361.794	-0.244909	0.38706	-0.632741	0.526903	0.753886	0.254148	8.43356
5730455P16Rik	10.2859	10.0727	10.1802	10.171	10.0098	10.235	1147.74	0.0604491	0.244972	0.246759	0.805094	0.912834	0.102152	10.1591
5730457N03Rik	0	0	0	0	0	0	0	NA	NA	NA	NA	NA	0	0
5730460C07Rik	0	0	0	0	0	0	0	NA	NA	NA	NA	NA	0	0
5730469M10Rik	8.29859	9.38841	8.50011	8.12317	8.92155	8.55654	451.678	0.369451	0.38846	0.951065	0.341571	0.612596	0.458074	8.63139
5730480H06Rik	2.93025	2.92435	3.01181	2.97084	2.92377	2.95947	7.90033	-0.130885	2.747	-0.0476465	0.961998	NA	0.0346721	2.95342
5730494M16Rik	9.0969	9.95117	9.55498	9.04165	9.8243	9.81879	798.7	-0.0401687	0.302785	-0.132664	0.894459	0.953147	0.392975	9.54796
5730494N06Rik	11.1798	11.303	11.5155	11.4816	12.1785	11.9093	3235.05	-0.655392	0.229689	-2.85339	0.00432552	0.0385264	0.378435	11.5946
5730507C01Rik	9.35461	9.2338	9.71643	9.57995	9.30399	9.50468	709.878	-0.0521631	0.321703	-0.162147	0.87119	0.94367	0.183312	9.44891
5730508B09Rik	6.43757	6.1081	6.47726	6.33707	6.78355	6.53637	94.9127	-1.37844	1.36746	-1.00803	0.313441	0.584236	0.223244	6.44665
5730522E02Rik	2.84763	2.84501	2.84429	2.84388	3.01071	2.85737	7.99337	-3.46529	3.5389	-0.9792	0.327481	NA	0.0667662	2.87481
5730528L13Rik	8.61085	8.47157	8.26561	8.38491	8.44187	8.2632	343.485	0.188636	0.400369	0.471155	0.63753	0.825571	0.132736	8.40634
5730559C18Rik	4.66921	4.56647	4.63238	4.83374	4.58115	4.70918	26.6318	-1.72071	1.44274	-1.19267	0.232999	0.502614	0.0982294	4.66536
5730577I03Rik	6.15284	6.1808	6.26019	6.30662	6.41358	6.3041	78.6401	-0.890018	0.776665	-1.14595	0.251816	0.524157	0.0947608	6.26969
5730590G19Rik	5.96095	5.52586	5.52024	5.75611	5.76853	5.88622	57.8538	-5.74919	1.86335	-3.08541	0.00203272	0.0220441	0.181849	5.73632
5830403L16Rik	-1.95198	-1.9509	-1.95139	-1.95198	-1.95132	-1.95013	0.173236	-0.582649	4.07006	-0.143155	0.886168	NA	0.000701779	-1.95128
5830403M04Rik	-1.95198	-1.9509	-1.95139	-1.95198	-1.95132	-1.95013	0.173236	-0.582649	4.07006	-0.143155	0.886168	NA	0.000701779	-1.95128
5830411N06Rik	0	0	0	0	0	0	0	NA	NA	NA	NA	NA	0	0
5830415F09Rik	7.90876	7.64275	7.8614	8.00858	8.16466	7.94671	248.315	-0.629878	0.51802	-1.21593	0.22401	0.490972	0.17252	7.92214
5830416I19Rik	7.69171	10.7847	8.15818	7.58304	9.23052	7.01973	815.583	1.5822	0.475352	3.32849	0.000873178	0.0118882	1.37903	8.41132
5830416P10Rik	5.44725	5.28113	5.43419	5.57296	5.36079	5.59961	45.6936	-1.92528	1.28339	-1.50015	0.133575	0.369036	0.121848	5.44932
5830417I10Rik	7.97152	7.63787	7.75395	7.90373	8.1071	7.7649	237.641	-0.377895	0.546467	-0.691525	0.489236	0.728161	0.170275	7.85651
5830418K08Rik	9.48984	8.28575	9.46689	9.24296	9.11731	9.34777	619.28	-0.332756	0.493129	-0.674786	0.499812	0.735746	0.449719	9.15842
5830418P13Rik	-1.95198	-1.9509	-1.95139	-1.95198	-1.95132	-1.95013	0.173236	-0.582649	4.07006	-0.143155	0.886168	NA	0.000701779	-1.95128
5830428M24Rik	0.628525	0.628735	0.651429	0.628531	0.633754	0.636628	1.56485	-0.0938927	3.95882	-0.0237174	0.981078	NA	0.00890147	0.6346
5830432E09Rik	4.64877	4.69821	4.65868	4.55679	4.50505	4.51713	25.2853	3.92824	1.66009	2.36627	0.0179682	0.105808	0.0814595	4.59744
5830433M19Rik	8.85453	9.41653	9.19267	9.0671	9.42065	9.35491	610.454	-0.228805	0.314996	-0.726372	0.467611	0.712794	0.225721	9.21773
5830473C10Rik	2.34008	2.33212	2.33169	2.34886	2.41963	2.33569	5.27891	-3.04092	3.22229	-0.943714	0.345316	NA	0.0340514	2.35134
5930403L14Rik	2.88665	2.87898	2.88766	2.89355	2.96676	2.92962	7.67378	-2.91369	2.38804	-1.22012	0.222421	NA	0.0341661	2.9072
5930412G12Rik	4.74872	5.19409	4.73012	4.74625	4.80516	4.71548	33.6271	1.14986	1.21042	0.949964	0.34213	0.612819	0.184182	4.8233
5930416I19Rik	8.75801	9.44709	8.91796	8.81089	8.89421	8.59619	504.137	0.502433	0.391291	1.28404	0.199129	0.460902	0.289815	8.90406
5930434B04Rik	10.1336	10.2269	10.427	10.1616	10.0134	10.448	1218.88	0.0794121	0.248343	0.319767	0.749145	0.88554	0.171518	10.2351
5930438M14	3.9627	3.96495	4.12226	3.96676	4.01503	4.12394	17.2075	-2.81787	2.17904	-1.29317	0.195952	0.456808	0.0777446	4.02594
6030405A18Rik	0	0	0	0	0	0	0	NA	NA	NA	NA	NA	0	0
6030407O03Rik	-1.25165	-1.25011	-1.2511	-1.25165	-1.25095	-1.24589	0.346473	-0.991849	4.04905	-0.244959	0.806489	NA	0.00219631	-1.25022
6030408B16Rik	2.59214	2.57408	2.63178	2.60764	2.57363	2.60141	6.09472	0.338434	2.92254	0.115801	0.90781	NA	0.0220777	2.59678
6030419C18Rik	6.15908	6.18478	6.0032	6.17563	6.09283	5.97934	69.8465	0.228458	0.79838	0.286152	0.774762	0.899212	0.089862	6.09914
6030422M02Rik	7.65852	8.00814	7.69928	7.60275	7.64666	7.54958	213.011	0.527621	0.501073	1.05298	0.292349	0.564624	0.162107	7.69415
6030429G01Rik	6.0648	6.26093	6.3229	6.52522	6.15076	6.23301	80.7051	-0.420814	0.996263	-0.422393	0.672738	0.845597	0.158152	6.2596
6030440G07Rik	3.46198	3.40913	3.45746	3.48196	3.40404	3.42676	10.9381	0.481206	1.82582	0.263556	0.792122	NA	0.0315238	3.44022
6030446N20Rik	6.79537	6.55414	7.1632	7.23027	7.34948	7.48575	155.894	-2.73364	1.09628	-2.49355	0.0126473	0.0824232	0.3529	7.09637
6030458C11Rik	9.45106	9.40011	9.00138	9.06151	8.91443	8.8296	572.057	0.622398	0.33064	1.8824	0.0597815	0.227275	0.257492	9.10968
6030466F02Rik	-1.95198	-1.9509	-1.95139	-1.95198	-1.95132	-1.95013	0.173236	-0.582649	4.07006	-0.143155	0.886168	NA	0.000701779	-1.95128
6030468B19Rik	-1.95198	-1.9509	-1.95139	-1.95198	-1.95132	-1.95013	0.173236	-0.582649	4.07006	-0.143155	0.886168	NA	0.000701779	-1.95128
6030498E09Rik	0	0	0	0	0	0	0	NA	NA	NA	NA	NA	0	0
6230400D17Rik	5.27434	5.0143	5.1601	5.20947	5.05034	5.19331	36.7429	-0.829776	1.3529	-0.613333	0.539656	0.761674	0.0993185	5.15031
6230409E13Rik	7.97692	7.36436	7.53293	7.71199	7.74074	7.44104	207.401	-0.061224	0.607813	-0.100728	0.919766	0.965842	0.225836	7.628
6230427J02Rik	6.29214	6.02796	6.13011	6.00623	6.01393	6.18934	71.1062	0.500701	0.879492	0.569306	0.569148	0.78048	0.115416	6.10995
6330403A02Rik	4.22035	4.21949	4.25064	4.34618	4.42196	4.29703	20.5507	-4.54605	1.81578	-2.50363	0.0122927	0.0809177	0.0799365	4.29261
6330403K07Rik	2.54888	2.53073	2.54413	2.52995	2.60908	2.55424	5.99626	-0.703232	3.29823	-0.213215	0.831159	NA	0.0292212	2.55284
6330406I15Rik	11.4874	12.2319	11.6706	11.3517	11.8406	11.5214	3399.06	0.284177	0.189896	1.49649	0.134526	0.370492	0.316362	11.6839
6330407A03Rik	2.44307	2.44382	2.44335	2.44309	2.56315	2.45143	5.89724	-3.31655	3.95277	-0.839045	0.401444	NA	0.0483622	2.46465
6330407J23Rik	0	0	0	0	0	0	0	NA	NA	NA	NA	NA	0	0
6330408A02Rik	5.7578	6.16588	5.85967	5.63286	5.6273	5.78228	62.4857	1.9722	1.02188	1.92998	0.0536092	0.212628	0.198582	5.8043
6330409D20Rik	1.82003	1.82051	1.82946	1.83929	1.87021	1.82422	3.61709	-4.02889	3.8026	-1.05951	0.289368	NA	0.0191438	1.83395
6330409N04Rik	8.92134	9.03204	8.90196	9.41614	9.77141	9.27979	632.142	-0.926796	0.321298	-2.88454	0.00391991	0.0357445	0.338163	9.22045
6330410L21Rik	3.04302	3.17816	3.02539	3.02621	3.02071	3.02469	9.02786	2.80974	2.42623	1.15807	0.246836	NA	0.0617873	3.05303
6330415B21Rik	1.51493	1.49996	1.50891	1.51303	1.49975	1.52736	2.8486	-0.188429	3.85736	-0.0488491	0.96104	NA	0.0103855	1.51066
6330416G13Rik	7.84194	7.92285	8.02717	9.1059	8.79858	8.75177	403.183	-2.03525	0.425476	-4.78346	1.72e-06	7.1e-05	0.540117	8.40803
6330418K02Rik	4.77319	4.64629	4.68575	4.73213	4.81605	4.75868	27.1093	-1.5014	1.43619	-1.04541	0.295835	0.567845	0.0614664	4.73535
6330439K17Rik	5.83394	5.71961	6.09612	5.66223	5.91545	5.93629	61.9275	0.577534	1.11459	0.518157	0.604349	0.80318	0.157574	5.86061
6330503K22Rik	9.31613	10.1872	9.66619	9.73874	9.32336	9.58305	834.55	0.261044	0.438533	0.595268	0.551665	0.769348	0.32193	9.63579
6330512M04Rik	9.04394	9.44031	9.08837	9.17689	9.3263	9.15362	597.33	-0.0554991	0.318943	-0.174009	0.861858	0.939097	0.150371	9.2049
6330527O06Rik	-0.421241	-0.41989	-0.421209	-0.421239	-0.421204	-0.406687	0.692945	-1.17386	4.01144	-0.292629	0.769806	NA	0.00584993	-0.418578
6330545A04Rik	4.75586	5.05321	4.73327	4.71479	4.66564	4.76741	30.6286	1.77509	1.7753	0.999881	0.317368	0.588633	0.137756	4.7817
6330549D23Rik	5.66229	5.95424	5.5901	5.53279	5.7674	5.63405	55.6003	0.775497	0.974122	0.796099	0.425975	0.68141	0.151267	5.69014
6330578E17Rik	11.1552	10.8725	11.1433	11.1723	11.1447	11.0622	2190.94	-0.0904101	0.21822	-0.414308	0.678649	0.848507	0.113958	11.0917
6430411K18Rik	0	0	0	0	0	0	0	NA	NA	NA	NA	NA	0	0
6430527G18Rik	12.5324	11.952	12.2844	12.2404	11.4822	11.8965	4448.18	0.470163	0.176116	2.66963	0.0075936	0.0580109	0.368293	12.0646
6430531B16Rik	3.766	3.70058	3.73173	3.85155	3.69957	3.75475	13.8481	-0.592628	2.12139	-0.279359	0.77997	0.900508	0.0564028	3.7507
6430548G04	7.10371	7.02214	7.00142	7.12831	7.0786	7.0926	134.804	-0.230496	0.587309	-0.392461	0.694718	0.857238	0.0492109	7.07113
6430548M08Rik	10.9357	9.36278	10.4738	10.5084	9.85484	10.3135	1340.17	0.0262826	0.33572	0.0782874	0.937599	0.974208	0.55389	10.2415
6430550D23Rik	2.53252	2.51103	2.59417	2.52575	2.5106	2.52258	5.91903	1.44721	2.97703	0.486125	0.626878	NA	0.0312646	2.53278
6430562O15Rik	6.31943	6.28881	6.22976	6.27892	6.22736	6.30525	77.6574	0.0500937	0.766451	0.065358	0.947889	0.97812	0.0385024	6.27492
6430571L13Rik	2.55308	2.48612	2.513	2.49313	2.4857	2.51339	5.74448	1.3548	3.03695	0.446105	0.655521	NA	0.0256174	2.5074
6430573F11Rik	5.92085	5.63604	5.93883	6.0402	5.71179	5.90821	61.2128	-1.19647	1.19241	-1.00341	0.315664	0.586659	0.152865	5.85932
6430584L05	0	0	0	0	0	0	0	NA	NA	NA	NA	NA	0	0
6430598A04Rik	5.49771	5.31632	5.51343	5.62169	5.54201	5.42976	46.2616	-1.47947	1.46871	-1.00732	0.313779	0.584549	0.104296	5.48682
6430704M03Rik	2.03464	2.03521	2.1267	2.03466	2.03489	2.03887	4.35791	1.66607	3.96243	0.420466	0.674145	NA	0.0372053	2.05083
6430706D22Rik	0	0	0	0	0	0	0	NA	NA	NA	NA	NA	0	0
6530401N04Rik	8.97789	9.30935	8.89699	9.04438	9.41383	9.21167	577.279	-0.29085	0.326002	-0.892173	0.3723	0.637626	0.201615	9.14235
6530402F18Rik	8.48392	6.97684	8.28059	7.94242	7.73045	8.02141	285.171	-0.715704	2.02232	-0.353902	0.723412	0.873366	0.525947	7.90594
6530411M01Rik	0	0	0	0	0	0	0	NA	NA	NA	NA	NA	0	0
6530418L21Rik	7.19455	6.26027	6.67558	6.70306	6.60295	6.60196	116.355	-0.573153	1.2563	-0.456222	0.64823	0.831495	0.301073	6.67306
6530439I21	0	0	0	0	0	0	0	NA	NA	NA	NA	NA	0	0
6720401G13Rik	11.0702	9.89717	11.0053	10.4646	9.46323	10.4661	1526.22	0.732501	0.222181	3.29686	0.000977716	0.0130277	0.625191	10.3944
6720456B07Rik	11.1312	11.6587	11.5005	11.7385	12.3375	11.7979	3476.14	-0.659472	0.201437	-3.27384	0.00106097	0.0139478	0.395554	11.694
6720456H20Rik	10.148	9.17413	10.0885	10.193	9.81676	10.2142	1036.17	-0.422155	0.31906	-1.32312	0.185796	0.443986	0.401552	9.93909
6720463M24Rik	8.16634	7.94242	8.67778	8.59349	8.33412	9.07458	390.767	-0.885552	0.373809	-2.369	0.0178365	0.105311	0.403185	8.46479
6720468P15Rik	5.28138	5.25478	5.36645	5.6081	5.52108	5.43236	45.3891	-3.54875	1.40064	-2.53366	0.0112878	0.0765754	0.137559	5.41069
6720483E21Rik	0.156766	0.157316	0.170284	0.164322	0.15683	0.160747	1.10105	-0.313823	3.89815	-0.0805056	0.935835	NA	0.00540695	0.161044
6720489N17Rik	5.85094	5.60848	5.79218	5.84349	5.89737	5.94157	58.3864	-1.84165	1.35544	-1.35871	0.174238	0.429382	0.116411	5.82234
6820408C15Rik	2.56889	2.56449	2.59153	2.58114	2.6287	2.58799	6.08391	-2.15835	2.58685	-0.834353	0.404082	NA	0.0229295	2.58712
6820431F20Rik	14.2793	13.9541	14.4148	14.5711	14.3846	14.6132	21470	-0.355972	0.150163	-2.37057	0.0177609	0.105	0.2379	14.3695
7420426K07Rik	0	0	0	0	0	0	0	NA	NA	NA	NA	NA	0	0
7420461P10Rik	0	0	0	0	0	0	0	NA	NA	NA	NA	NA	0	0
7420700N18Rik	0	0	0	0	0	0	0	NA	NA	NA	NA	NA	0	0
7420701I03Rik	0	0	0	0	0	0	0	NA	NA	NA	NA	NA	0	0
7530416G11Rik	2.61105	2.63008	2.61546	2.6153	2.6079	2.61644	6.155	0.295009	2.0948	0.140829	0.888005	NA	0.00760617	2.61604
7530420F21Rik	1.99914	1.97417	1.99669	1.97365	1.97388	2.017	4.00178	1.71072	3.8605	0.443134	0.657669	NA	0.0180541	1.98909
7630403G23Rik	0	0	0	0	0	0	0	NA	NA	NA	NA	NA	0	0
8030411F24Rik	0	0	0	0	0	0	0	NA	NA	NA	NA	NA	0	0
8030423F21Rik	3.56252	3.43884	3.47902	3.46634	3.4432	3.49301	11.3974	0.181959	2.06879	0.087954	0.929913	NA	0.0451962	3.48049
8030423J24Rik	-1.95198	-1.9509	-1.95139	-1.95198	-1.95132	-1.95013	0.173236	-0.582649	4.07006	-0.143155	0.886168	NA	0.000701779	-1.95128
8030442B05Rik	2.95894	2.91437	2.9721	2.94405	2.9241	2.94553	7.72017	-0.228942	2.3131	-0.0989761	0.921157	NA	0.0213798	2.94318
8030443G20Rik	0	0	0	0	0	0	0	NA	NA	NA	NA	NA	0	0
8030462N17Rik	7.72672	8.03987	7.6839	7.98385	7.4218	7.75399	227.849	0.287864	0.655363	0.439244	0.660485	0.839365	0.223309	7.76835
8430403D17Rik	4.21491	4.30854	4.16888	4.17322	4.21228	4.19309	19.0536	0.588947	1.42319	0.413822	0.679004	0.848674	0.0510883	4.21182
8430406I07Rik	8.42732	8.50516	8.39423	8.35517	8.91851	8.59691	381.6	-0.362944	0.4172	-0.869951	0.384327	0.647816	0.207618	8.53288
8430408G22Rik	3.70717	3.65289	3.65179	3.70287	3.70759	3.78681	13.326	-4.43812	2.46763	-1.79854	0.0720915	0.255882	0.0493644	3.70152
8430410A17Rik	10.1657	10.9423	10.2495	10.0484	10.3478	10.1902	1336.92	0.358544	0.275863	1.29972	0.193697	0.453985	0.318545	10.324
8430410K20Rik	10.8197	10.6946	10.7913	10.7842	11.1564	10.8108	1853.31	-0.19628	0.249152	-0.787793	0.430818	0.685548	0.15996	10.8428
8430419L09Rik	8.62523	8.59522	8.85377	9.06038	8.88963	8.95568	463.627	-0.54588	0.365295	-1.49435	0.135083	0.37158	0.184417	8.82999
8430422H06Rik	0	0	0	0	0	0	0	NA	NA	NA	NA	NA	0	0
8430423G03Rik	3.91271	3.88523	3.9434	3.92398	4.01039	3.98099	15.6732	-1.91244	1.89532	-1.00903	0.31296	0.583834	0.0460444	3.94278
8430427H17Rik	7.46982	7.08532	7.20224	6.78074	6.61697	6.82697	144.382	2.10615	0.623941	3.37556	0.00073666	0.0104379	0.314193	6.99701
8430429K09Rik	8.11611	7.93384	7.91294	7.8904	8.1099	7.98241	256.485	-0.0152327	0.487025	-0.0312771	0.975049	0.990609	0.0993437	7.99093
8430431K14Rik	0.659237	0.652627	0.657077	0.673297	0.652511	0.656475	1.5733	-0.210205	3.9055	-0.0538227	0.957076	NA	0.00769368	0.658537
8430436N08Rik	-1.95198	-1.9509	-1.95139	-1.95198	-1.95132	-1.95013	0.173236	-0.582649	4.07006	-0.143155	0.886168	NA	0.000701779	-1.95128
8430437L04Rik	0	0	0	0	0	0	0	NA	NA	NA	NA	NA	0	0
9030025P20Rik	6.41749	6.44614	6.4673	6.37056	6.37425	6.39231	85.4288	0.355694	0.714527	0.497804	0.618622	0.813491	0.0394496	6.41134
9030204H09Rik	0.0218582	0.0226455	0.0219055	0.0437295	0.021914	0.0218959	0.990008	-1.12674	3.96861	-0.283912	0.776478	NA	0.00885828	0.0256581
9030224M15Rik	4.77927	5.14011	4.88959	4.83332	4.74147	4.76767	32.5585	2.35666	1.55897	1.51168	0.130615	0.363949	0.147735	4.85857
9030404E10Rik	0	0	0	0	0	0	0	NA	NA	NA	NA	NA	0	0
9030418K01Rik	5.31935	5.24078	5.34593	5.28927	5.31604	5.35176	39.8763	-0.235615	1.0384	-0.226901	0.8205	0.920376	0.0409367	5.31052
9030425E11Rik	12.2506	12.1132	11.9968	11.5147	11.4655	11.4334	3698.81	0.807196	0.177624	4.54442	5.51e-06	0.000191289	0.365352	11.7957
9030612E09Rik	7.68981	7.2459	7.75432	7.76656	7.70872	7.80225	209.515	-0.672233	0.589879	-1.13961	0.254448	0.526311	0.20747	7.66126
9030617O03Rik	7.18502	7.38139	7.50873	7.42155	7.04472	7.58942	171.175	0.0860388	0.670988	0.128227	0.897969	0.954617	0.204389	7.35514
9030619P08Rik	5.99015	7.08191	5.8985	5.93254	5.7862	5.71949	105.663	2.66999	1.01922	2.61965	0.00880189	0.0649677	0.506365	6.06813
9030624G23Rik	8.50609	8.39786	8.76128	8.53419	8.56502	8.60653	381.329	-0.0368736	0.393652	-0.0936707	0.925371	0.968105	0.120457	8.56183
9030624J02Rik	11.1519	10.3286	11.2458	10.7982	10.7329	11.4292	2077.6	-0.106167	0.276174	-0.384419	0.700668	0.860056	0.403533	10.9478
9030625A04Rik	8.91673	9.15825	9.55211	9.58626	9.68378	9.72111	724.317	-0.768011	0.334582	-2.29543	0.0217084	0.120222	0.324198	9.43637
9130008F23Rik	3.27922	3.24136	3.24055	3.30946	3.26624	3.32892	9.83352	-3.85771	2.62916	-1.46728	0.1423	NA	0.0359641	3.27763
9130011E15Rik	8.93373	8.71295	8.81872	8.74294	8.55993	8.8581	441.002	0.204313	0.361003	0.565958	0.571422	0.781954	0.130426	8.77106
9130011J15Rik	12.5899	13.1024	12.6634	12.6868	12.8489	12.824	7131.33	-0.00274198	0.186082	-0.0147353	0.988243	0.995774	0.183783	12.7859
9130014G24Rik	1.49525	1.49563	1.54915	1.49526	1.49542	1.50742	2.91095	1.02334	3.9626	0.258251	0.796213	NA	0.0215103	1.50635
9130015A21Rik	0	0	0	0	0	0	0	NA	NA	NA	NA	NA	0	0
9130015L21Rik	0	0	0	0	0	0	0	NA	NA	NA	NA	NA	0	0
9130017N09Rik	0	0	0	0	0	0	0	NA	NA	NA	NA	NA	0	0
9130019O22Rik	8.56739	8.85066	8.00128	8.48923	8.12683	7.94071	351.54	0.606519	0.481837	1.25876	0.208116	0.471982	0.361572	8.32935
9130019P16Rik	-1.95219	-1.95095	-1.94996	-1.95219	-1.95143	-1.95163	0.19927	1.18861	4.06753	0.292218	0.77012	NA	0.000847694	-1.95139
9130023H24Rik	8.8982	8.65071	8.87215	9.13142	9.30937	8.87397	511.093	-0.551562	0.403283	-1.36768	0.171412	0.425273	0.230628	8.95597
9130024F11Rik	5.47756	5.27497	5.50046	5.49853	5.45805	5.41688	44.209	-1.11574	1.47019	-0.758914	0.447904	0.699583	0.0855029	5.43774
9130204L05Rik	0	0	0	0	0	0	0	NA	NA	NA	NA	NA	0	0
9130206I24Rik	9.2153	9.97876	9.30909	9.07232	9.59922	9.38639	724.678	0.238925	0.317682	0.752087	0.451999	0.702164	0.322573	9.42685
9130209A04Rik	-2.01158	-2.01162	-2.01183	-2.01208	-2.0118	-2.01187	0.073322	1.16606	4.06331	0.286973	0.774133	NA	0.000182565	-2.0118
9130221F21Rik	4.44111	4.49168	4.42829	4.45583	4.39522	4.46932	22.0128	0.302232	1.38148	0.218774	0.826826	0.923688	0.0335825	4.44691
9130221H12Rik	5.8033	6.01431	5.81928	5.83735	5.93073	5.74058	59.8112	0.347527	0.870004	0.399455	0.689558	0.853783	0.0984123	5.85759
9130227L01Rik	-1.37886	-1.38093	-1.38156	-1.382	-1.38147	-1.38168	0.219966	1.79568	4.03859	0.444632	0.656586	NA	0.00114531	-1.38108
9130230L23Rik	1.71286	1.71331	1.73131	1.74697	1.71306	1.73681	3.32151	-1.36424	3.86002	-0.353428	0.723767	NA	0.014735	1.72572
9130401M01Rik	9.97131	11.1383	9.97317	10.2406	10.6632	10.4729	1468.28	-0.154928	0.332473	-0.465985	0.641226	0.827251	0.449539	10.4099
9130404H23Rik	-1.95198	-1.9509	-1.95139	-1.95198	-1.95132	-1.95013	0.173236	-0.582649	4.07006	-0.143155	0.886168	NA	0.000701779	-1.95128
9130409I23Rik	0	0	0	0	0	0	0	NA	NA	NA	NA	NA	0	0
9230009I02Rik	1.20347	1.20379	1.25731	1.20348	1.20361	1.20357	2.39124	2.00265	3.97736	0.503512	0.614605	NA	0.0219328	1.21254
9230102K24Rik	0	0	0	0	0	0	0	NA	NA	NA	NA	NA	0	0
9230102O04Rik	-1.95198	-1.9509	-1.95139	-1.95198	-1.95132	-1.95013	0.173236	-0.582649	4.07006	-0.143155	0.886168	NA	0.000701779	-1.95128
9230104L09Rik	0	0	0	0	0	0	0	NA	NA	NA	NA	NA	0	0
9230105E05Rik	1.29964	1.29825	1.30265	1.30947	1.29806	1.33726	2.49996	-1.72291	3.88485	-0.443494	0.657408	NA	0.0151646	1.30755
9230110C19Rik	9.31965	8.80403	9.32337	9.22918	9.47931	10.1247	728.034	-0.769166	0.403623	-1.90565	0.0566951	0.219982	0.4303	9.38004
9230110F15Rik	0	0	0	0	0	0	0	NA	NA	NA	NA	NA	0	0
9230112D13Rik	0	0	0	0	0	0	0	NA	NA	NA	NA	NA	0	0
9230112J17Rik	0.576251	0.576452	0.585493	0.589662	0.576341	0.588274	1.49575	-1.31664	3.89239	-0.338261	0.735167	NA	0.00642015	0.582079
9230114K14Rik	7.64697	7.71713	7.66445	7.7083	8.01289	7.75242	219.211	-0.403928	0.486914	-0.829569	0.406783	0.667098	0.134065	7.75036
9230115E21Rik	0.487363	0.479004	0.478887	0.478822	0.4789	0.502603	1.40603	0.738816	3.88902	0.189975	0.849329	NA	0.00960109	0.484263
9230116N13Rik	5.51731	5.84711	5.5725	5.48035	5.57492	5.61295	51.5567	0.640531	0.968999	0.661024	0.508597	0.741331	0.129434	5.60086
9330020H09Rik	6.59691	6.23266	6.6913	6.62641	6.82446	6.6311	102.696	-1.43135	1.30773	-1.09453	0.273722	0.547174	0.19765	6.60047
9330111N05Rik	0	0	0	0	0	0	0	NA	NA	NA	NA	NA	0	0
9330117O12	-0.421241	-0.41989	-0.421209	-0.421239	-0.421204	-0.406687	0.692945	-1.17386	4.01144	-0.292629	0.769806	NA	0.00584993	-0.418578
9330133O14Rik	7.0353	7.07084	7.12207	7.07587	7.08531	7.14996	136.542	-0.108874	0.579723	-0.187803	0.851031	0.934483	0.040506	7.08989
9330151L19Rik	7.57394	7.2884	7.62492	7.30212	7.48372	7.38481	177.687	0.335897	0.613057	0.547905	0.583757	0.790161	0.140737	7.44299
9330158H04Rik	5.19939	5.31841	5.14701	5.17576	5.22668	5.17549	37.6752	0.203613	1.04498	0.19485	0.845511	0.931625	0.0607031	5.20712
9330159F19Rik	7.15436	7.37554	7.21218	7.33747	7.1008	7.54702	161.43	-0.256236	0.673078	-0.380693	0.703431	0.860883	0.164834	7.2879
9330159M07Rik	5.60804	5.52168	5.7551	5.60208	5.63842	5.68665	50.6442	-0.301295	0.983401	-0.306381	0.759315	0.890823	0.079693	5.63533
9330162B11Rik	0	0	0	0	0	0	0	NA	NA	NA	NA	NA	0	0
9330175E14Rik	3.2054	3.45281	3.20606	3.21005	3.20618	3.21071	11.1061	-1.37818	3.37483	-0.408371	0.683001	NA	0.100096	3.24854
9330175M20Rik	-0.790435	-0.794746	-0.792328	-0.796195	-0.795935	-0.79618	0.492558	2.70156	4.00364	0.674776	0.499818	NA	0.0024012	-0.794303
9330178D15Rik	0	0	0	0	0	0	0	NA	NA	NA	NA	NA	0	0
9330179D12Rik	3.26647	3.20407	3.31608	3.23929	3.20336	3.20725	9.70801	2.12659	2.59028	0.820986	0.411654	NA	0.0451529	3.23942
9330182L06Rik	3.92162	3.92378	3.99929	4.03105	3.92258	4.09843	16.5705	-2.08661	2.67309	-0.780599	0.435038	0.689352	0.0732457	3.98279
9330182O14Rik	0	0	0	0	0	0	0	NA	NA	NA	NA	NA	0	0
9430007A20Rik	0	0	0	0	0	0	0	NA	NA	NA	NA	NA	0	0
9430008C03Rik	10.6753	10.9392	10.4831	11.1402	11.1476	10.7447	1896.37	-0.418402	0.216829	-1.92964	0.0536514	0.212734	0.267132	10.855
9430014N10Rik	0	0	0	0	0	0	0	NA	NA	NA	NA	NA	0	0
9430015G10Rik	8.76939	8.66692	8.51498	8.66791	8.35797	8.85643	406.265	0.0607623	0.444178	0.136797	0.891191	0.95211	0.179027	8.63893
9430016H08Rik	9.33832	9.75614	9.48676	9.65383	10.1711	9.79063	862.347	-0.541604	0.266836	-2.02973	0.0423845	0.183709	0.286955	9.69946
9430018G01Rik	2.81591	2.72426	2.74206	2.7388	2.72376	2.75146	6.84909	0.997442	2.85217	0.349713	0.726554	NA	0.0343037	2.74937
9430019J16Rik	0	0	0	0	0	0	0	NA	NA	NA	NA	NA	0	0
9430020K01Rik	10.1633	9.51174	9.8207	9.64852	9.24823	9.27665	827.214	0.724684	0.286207	2.53203	0.0113405	0.0768951	0.34745	9.61151
9430021M05Rik	0	0	0	0	0	0	0	NA	NA	NA	NA	NA	0	0
9430023L20Rik	10.0497	10.5285	10.0757	9.81316	9.70907	10.2305	1111.2	0.442257	0.35297	1.25296	0.210221	0.474827	0.294139	10.0678
9430031J16Rik	0	0	0	0	0	0	0	NA	NA	NA	NA	NA	0	0
9430032N09Rik	0	0	0	0	0	0	0	NA	NA	NA	NA	NA	0	0
9430037G07Rik	5.12651	4.99707	5.14152	5.00265	5.27091	5.26807	37.2178	-1.06598	1.78256	-0.598006	0.549836	0.768424	0.120693	5.13446
9430038I01Rik	8.66919	9.80346	8.75994	8.95214	9.49474	9.01746	614.896	-0.175665	0.374064	-0.469611	0.638633	0.82606	0.442497	9.11616
9430041J12Rik	0	0	0	0	0	0	0	NA	NA	NA	NA	NA	0	0
9430060I03Rik	4.98111	4.90752	4.97025	5.12347	5.1302	5.05538	33.7331	-2.65485	1.47525	-1.79959	0.0719246	0.255499	0.0898443	5.02799
9430069I07Rik	2.87788	2.81563	2.84247	2.84154	2.81509	2.86215	7.2157	0.433295	2.74888	0.157626	0.874751	NA	0.0249484	2.84246
9430076C15Rik	5.17331	4.95135	5.17317	4.99241	5.1212	5.0752	35.0156	0.0909756	1.68475	0.0539995	0.956936	0.981855	0.0930833	5.08111
9430076G02Rik	0	0	0	0	0	0	0	NA	NA	NA	NA	NA	0	0
9430083A17Rik	4.10878	3.96877	4.00838	3.98444	4.03813	4.00969	16.5313	-0.0402223	1.70836	-0.0235443	0.981216	0.993133	0.0496784	4.0197
9430091E24Rik	6.02382	6.10832	6.01815	6.10686	6.11422	6.05133	67.5758	-0.286497	0.801264	-0.357556	0.720676	0.871763	0.0446108	6.07045
9530002B09Rik	0	0	0	0	0	0	0	NA	NA	NA	NA	NA	0	0
9530003J23Rik	0	0	0	0	0	0	0	NA	NA	NA	NA	NA	0	0
9530008L14Rik	4.53569	4.47176	4.60237	4.57081	4.61158	4.56435	23.8893	-1.45161	1.71192	-0.847939	0.396472	0.658346	0.0509238	4.55943
9530026F06Rik	1.30475	1.2982	1.32529	1.29982	1.30315	1.31396	2.48639	0.33435	3.47826	0.0961256	0.923421	NA	0.0102989	1.30753
9530026P05Rik	3.09559	3.06597	3.09732	3.11051	3.06533	3.15349	8.67914	-0.5393	2.53822	-0.212472	0.831739	NA	0.0326636	3.09804
9530027J09Rik	3.70511	3.62829	3.70776	3.6652	3.68297	3.66716	12.8577	-0.32369	2.05108	-0.157815	0.874603	NA	0.0295821	3.67608
9530036O11Rik	3.12269	3.22176	3.09788	3.09594	3.09901	3.09658	9.19774	2.10425	1.95391	1.07694	0.281506	NA	0.0497765	3.12231
9530048J24Rik	0	0	0	0	0	0	0	NA	NA	NA	NA	NA	0	0
9530051G07Rik	0.890303	0.890554	0.890398	0.89031	0.890415	0.933461	1.9056	-1.28402	3.97551	-0.322983	0.746708	NA	0.0175814	0.897573
9530052E02Rik	2.89001	2.86142	2.86982	2.89104	2.85144	2.91372	7.40193	0.289897	2.40281	0.120649	0.903969	NA	0.0229035	2.87958
9530053A07Rik	0	0	0	0	0	0	0	NA	NA	NA	NA	NA	0	0
9530059O14Rik	6.10345	5.7221	5.93775	5.88259	5.94114	6.19297	66.3784	-1.55164	1.35947	-1.14136	0.253721	0.525654	0.166266	5.96333
9530068E07Rik	13.8653	13.5393	14.0945	13.8962	13.8407	14.0554	15247.9	-0.11402	0.16549	-0.688984	0.490833	0.729433	0.197419	13.8819
9530077C05Rik	8.11162	8.70975	8.62867	8.35303	9.0181	8.8763	419.047	-0.547267	0.354557	-1.54352	0.122704	0.351521	0.335246	8.61624
9530080O11Rik	2.7482	2.71338	2.75814	2.7125	2.73841	2.76009	6.72145	0.149503	3.14279	0.0475703	0.962059	NA	0.0212261	2.73845
9530082P21Rik	7.26689	7.4739	7.50436	7.36536	7.27573	7.47598	170.386	0.130536	0.563771	0.23154	0.816895	0.9192	0.106065	7.3937
9530091C08Rik	7.0705	6.7102	7.16638	6.69808	6.95689	6.96606	127.7	0.41809	0.79572	0.525423	0.599289	0.80008	0.189587	6.92802
9630013A20Rik	0	0	0	0	0	0	0	NA	NA	NA	NA	NA	0	0
9630028B13Rik	4.36212	4.54777	4.40518	4.45071	4.39238	4.37698	22.3295	0.315254	1.48637	0.212096	0.832032	0.926602	0.0684288	4.42252
9630028H03Rik	0	0	0	0	0	0	0	NA	NA	NA	NA	NA	0	0
9630033F20Rik	4.07502	3.97311	4.06964	4.03948	3.97187	4.07585	16.6506	0.409336	1.96785	0.208012	0.83522	0.927688	0.0496009	4.03416
9830001H06Rik	10.336	10.2624	10.0878	10.2775	9.77805	9.55265	1098.89	0.539186	0.289222	1.86427	0.0622844	0.233435	0.316668	10.0491
9830107B12Rik	6.68536	6.78992	6.82929	6.72994	6.7484	6.66924	107.786	0.231968	0.671635	0.345379	0.72981	0.877009	0.0609978	6.74202
9830132P13	2.65284	2.63646	2.65895	2.65115	2.7101	2.65199	6.41298	-1.11094	2.56222	-0.433585	0.66459	NA	0.0255303	2.66025
9830147E19Rik	6.75164	6.60043	7.24927	6.70716	6.85038	6.8686	123.276	0.0503695	0.769394	0.0654664	0.947803	0.97812	0.224164	6.83791
9830166K06Rik	-0.421241	-0.41989	-0.421209	-0.421239	-0.421204	-0.406687	0.692945	-1.17386	4.01144	-0.292629	0.769806	NA	0.00584993	-0.418578
9930005F22Rik	2.05284	2.00658	2.02904	2.00605	2.00628	2.03003	4.08878	2.08591	3.85826	0.540635	0.588759	NA	0.0189948	2.0218
9930012K11Rik	4.11627	4.35285	4.10985	4.17195	4.10608	4.15502	19.4924	-0.388531	1.7596	-0.220807	0.825243	0.922595	0.0940672	4.16867
9930013L23Rik	7.70391	7.58434	7.80648	7.76033	7.8123	7.4785	209.979	0.0583141	0.577674	0.100946	0.919593	0.965734	0.133832	7.69098
9930014A18Rik	5.63889	5.66148	5.4393	5.60104	5.47653	5.50153	48.3212	0.303938	1.04426	0.291055	0.771009	0.89765	0.0926057	5.55313
9930021D14Rik	0	0	0	0	0	0	0	NA	NA	NA	NA	NA	0	0
9930021J03Rik	9.19378	9.3534	9.06407	9.4375	9.67336	8.96639	643.867	-0.258696	0.334476	-0.773437	0.439264	0.692281	0.259739	9.28142
9930023K05Rik	0	0	0	0	0	0	0	NA	NA	NA	NA	NA	0	0
9930104L06Rik	8.85192	8.69011	8.57972	8.80855	8.04757	8.55116	403.169	0.529906	0.471689	1.12342	0.261258	0.533655	0.290592	8.58817
9930111J21Rik1	5.03531	5.38703	5.1518	5.06148	5.04874	5.16019	38.2792	0.677625	1.24255	0.54535	0.585513	0.791008	0.131924	5.14076
9930111J21Rik2	0	0	0	0	0	0	0	NA	NA	NA	NA	NA	0	0
A030009H04Rik	7.65039	8.04061	7.93399	8.01212	8.00637	7.5969	242.347	0.0240695	0.580342	0.0414748	0.966917	0.986464	0.19735	7.87339
A130010J15Rik	7.08381	6.61175	7.40302	7.21558	7.11797	7.34794	152.168	-1.41101	1.00334	-1.40632	0.159631	0.408311	0.282921	7.13001
A130022J15Rik	9.42979	9.59544	9.87212	9.60572	9.15251	9.75519	780.356	0.209249	0.339065	0.617134	0.537146	0.760365	0.253551	9.56846
A130040M12Rik	15.8328	16.0535	15.4211	16.6916	16.4358	15.3802	69031.3	-0.457212	0.222672	-2.0533	0.0400437	0.177626	0.531514	15.9692
A130049A11Rik	6.6995	6.8263	6.69242	6.63663	6.64982	6.55705	103.903	0.601739	0.665398	0.904329	0.365821	0.632119	0.0892103	6.67695
A130077B15Rik	9.83933	10.0008	9.89126	9.96491	10.1922	9.69368	987.274	-0.0572328	0.282732	-0.202427	0.839583	0.929655	0.167655	9.93036
A1bg	-1.25165	-1.25011	-1.2511	-1.25165	-1.25095	-1.24589	0.346473	-0.991849	4.04905	-0.244959	0.806489	NA	0.00219631	-1.25022
A1cf	0	0	0	0	0	0	0	NA	NA	NA	NA	NA	0	0
A230001M10Rik	-1.95198	-1.9509	-1.95139	-1.95198	-1.95132	-1.95013	0.173236	-0.582649	4.07006	-0.143155	0.886168	NA	0.000701779	-1.95128
A230020J21Rik	1.55437	1.53773	1.54667	1.54697	1.53751	1.569	2.93015	-0.00679565	3.85606	-0.00176233	0.998594	NA	0.0118087	1.54871
A230028O05Rik	2.3277	2.31634	2.33881	2.35367	2.35129	2.32393	5.06031	-1.65508	2.77521	-0.596381	0.550921	NA	0.0151807	2.33529
A230046K03Rik	12.2845	11.6703	12.104	11.8928	11.8914	12.0339	4090.53	0.0988101	0.221529	0.446038	0.65557	0.836247	0.210889	11.9795
A230050P20Rik	8.5906	8.59457	8.31297	8.00514	8.15235	8.09484	328.22	0.950984	0.426402	2.23025	0.0257308	0.134739	0.253699	8.29175
A230051G13Rik	5.53637	5.89036	5.46684	5.71246	5.45819	5.48372	53.1341	0.397342	1.18983	0.33395	0.738417	0.881428	0.174306	5.59132
A230056J06Rik	2.89577	2.84001	2.87127	2.90964	2.83947	2.84739	7.36934	0.834814	2.76716	0.301686	0.762891	NA	0.0301139	2.86726
A230056P14Rik	3.54353	3.50402	3.57067	3.54292	3.56358	3.56221	11.7442	-1.16446	2.06831	-0.563002	0.573434	NA	0.0242422	3.54782
A230057D06Rik	1.1486	1.1489	1.18048	1.15249	1.14874	1.16469	2.25284	-0.519914	3.91519	-0.132794	0.894356	NA	0.012918	1.15732
A230065H16Rik	6.0421	6.42134	6.16772	6.12138	6.51693	6.42808	84.2171	-0.97991	0.756402	-1.29549	0.195152	0.45565	0.196136	6.28293
A230070E04Rik	0	0	0	0	0	0	0	NA	NA	NA	NA	NA	0	0
A230072C01Rik	8.79762	9.143	8.99445	8.77866	9.09095	8.83588	498.423	0.146076	0.333823	0.437586	0.661686	0.839718	0.157546	8.94009
A230072E10Rik	5.73128	5.72719	5.78746	5.7084	5.96582	5.75468	56.4487	-0.327214	0.941116	-0.347687	0.728075	0.876073	0.095404	5.77914
A230073K19Rik	4.84859	4.65579	4.7907	4.74761	4.71067	4.78133	27.5535	-0.608519	1.58203	-0.384645	0.7005	0.860056	0.0672113	4.75578
A230077H06Rik	2.87562	2.83103	2.84886	2.85509	2.86098	2.87764	7.2603	-1.50361	2.42692	-0.619555	0.535551	NA	0.017461	2.8582
A230108P19Rik	0.756627	0.756855	0.756713	0.756633	0.756728	0.795952	1.73236	-1.27673	3.97778	-0.320966	0.748236	NA	0.0160201	0.763251
A2ld1	7.70764	8.38008	7.77781	8.03165	8.27145	7.76038	272.68	-0.209605	0.493442	-0.424781	0.670997	0.844688	0.286555	7.98817
A2m	11.8438	9.71253	11.5725	11.9825	11.0464	11.8308	3046.71	-0.746452	0.340402	-2.19285	0.0283179	0.143004	0.859768	11.3314
A330009N23Rik	3.08173	2.99743	3.05512	3.00802	2.99682	3.02855	8.28415	1.63517	2.61379	0.625595	0.531581	NA	0.0344342	3.02794
A330021E22Rik	8.77203	8.97959	8.8779	8.57142	8.75868	8.84227	450.932	0.303204	0.352718	0.859621	0.389998	0.652734	0.13773	8.80032
A330023F24Rik	5.15689	4.9374	5.19752	5.08567	4.99739	4.98763	34.8465	0.0886846	1.56678	0.056603	0.954861	0.980602	0.103097	5.06042
A330032B11Rik	7.09746	7.136	7.09511	7.08835	7.27665	6.99446	140.212	-0.00200819	0.599958	-0.00334722	0.997329	0.998418	0.0922121	7.11467
A330035P11Rik	6.34371	6.98884	6.35224	6.26112	6.28019	6.42106	100.526	0.971925	0.877517	1.10759	0.268041	0.541476	0.274256	6.44119
A330040F15Rik	5.32807	5.13333	5.36693	5.35474	5.12996	5.39041	40.8201	-0.0231116	1.36199	-0.016969	0.986461	0.995151	0.119647	5.28391
A330041J22Rik	7.59087	7.82277	7.45634	7.36303	7.43501	7.57331	191.737	0.507831	0.579689	0.876041	0.381008	0.644908	0.163096	7.54022
A330048O09Rik	0	0	0	0	0	0	0	NA	NA	NA	NA	NA	0	0
A330049M08Rik	12.9377	13.408	13.4052	13.5729	13.9633	13.9868	12452.7	-0.692826	0.145838	-4.75066	2.03e-06	8.06e-05	0.39449	13.5456
A330049N07Rik	5.21244	5.10618	5.23868	5.22899	5.30989	5.37882	39.1581	-1.99083	1.45946	-1.36409	0.17254	0.42665	0.0924566	5.24583
A330050B17Rik	4.58777	4.58448	4.57252	4.56741	4.62298	4.60847	24.1731	-0.259068	1.24661	-0.207818	0.835371	0.927688	0.0213424	4.5906
A330050F15Rik	0	0	0	0	0	0	0	NA	NA	NA	NA	NA	0	0
A330069E16Rik	7.43546	7.72686	7.61953	7.78567	8.03954	7.66069	217.802	-0.678014	0.511152	-1.32644	0.184694	0.442635	0.200295	7.71129
A330070K13Rik	0	0	0	0	0	0	0	NA	NA	NA	NA	NA	0	0
A330076C08Rik	-1.95198	-1.9509	-1.95139	-1.95198	-1.95132	-1.95013	0.173236	-0.582649	4.07006	-0.143155	0.886168	NA	0.000701779	-1.95128
A330076H08Rik	4.81473	4.72474	4.96218	4.87417	4.79467	4.81004	29.3576	-0.979665	1.59638	-0.613678	0.539428	0.76149	0.0804757	4.83009
A330093E20Rik	0	0	0	0	0	0	0	NA	NA	NA	NA	NA	0	0
A330102I10Rik	1.49434	1.49473	1.49449	1.50975	1.52482	1.51441	2.85837	-4.79561	3.92088	-1.2231	0.221293	NA	0.0129038	1.50542
A3galt2	4.56154	4.4564	4.39592	4.35271	4.4496	4.40234	22.4716	1.54999	1.96859	0.787358	0.431073	0.685777	0.0721608	4.43642
A430005L14Rik	10.1138	10.4271	10.2876	10.6257	11.0214	10.9446	1591.27	-0.808885	0.218304	-3.70531	0.000211135	0.00387627	0.362045	10.57
A430033K04Rik	6.80548	6.89922	7.06355	6.9315	6.90676	6.9557	123.006	-0.0759366	0.639337	-0.118774	0.905454	0.958605	0.0841905	6.92703
A430035B10Rik	5.37889	5.06419	5.25498	5.2052	5.06094	5.28547	39.0774	0.593871	1.42912	0.41555	0.677739	0.847899	0.126275	5.20828
A430071A18Rik	1.91274	1.89788	1.92481	1.93333	1.8976	1.90555	3.7695	0.474627	3.54845	0.133756	0.893595	NA	0.0146141	1.91198
A430078G23Rik	7.79129	8.29788	7.79923	7.92193	8.08218	7.66048	254.944	0.184308	0.4777	0.385823	0.699627	0.860055	0.231266	7.9255
A430084P05Rik	1.23774	1.2127	1.2171	1.2124	1.21253	1.23622	2.33852	1.3164	3.86494	0.340599	0.733406	NA	0.0121683	1.22145
A430088P11Rik	1.61342	1.61978	1.65086	1.61966	1.61015	1.61816	3.1132	1.62117	3.27103	0.495615	0.620166	NA	0.0146433	1.622
A430089I19Rik	0	0	0	0	0	0	0	NA	NA	NA	NA	NA	0	0
A430090L17Rik	1.24319	1.23664	1.25472	1.24212	1.23646	1.26023	2.37729	0.22277	3.86575	0.0576265	0.954046	NA	0.00978698	1.24556
A430092G05Rik	0.342055	0.342226	0.346723	0.34976	0.347246	0.354083	1.27101	-2.63493	3.92812	-0.670786	0.502357	NA	0.00458632	0.347015
A430093F15Rik	1.0902	1.09048	1.09031	1.13138	1.09033	1.09826	2.16149	-3.27991	3.91074	-0.838693	0.401641	NA	0.0164196	1.09849
A430105I19Rik	-0.735394	-0.73388	-0.73535	-0.735392	-0.735133	-0.724819	0.519709	-1.12718	4.02784	-0.279847	0.779595	NA	0.00420923	-0.733328
A430107O13Rik	8.82207	7.34884	8.72844	8.59483	7.71214	8.53503	379.152	-0.214665	0.547202	-0.392296	0.694839	0.857311	0.607948	8.29023
A430107P09Rik	6.47942	6.65858	6.52109	6.41818	6.44819	6.4622	91.8391	0.552945	0.707163	0.78192	0.434261	0.68844	0.0857896	6.49794
A430110N23Rik	9.11781	6.88426	8.59759	8.27085	7.78624	7.53345	373.791	0.30708	2.17119	0.141434	0.887527	0.95017	0.797771	8.0317
A4galt	8.03772	7.40427	8.32329	8.14958	8.12836	8.19635	281.606	-0.752205	0.641363	-1.17282	0.240867	0.511421	0.325169	8.03993
A4gnt	3.63959	3.64136	3.69522	3.63964	3.77521	3.74795	13.4587	-2.22149	2.73165	-0.81324	0.41608	0.674179	0.0601494	3.68983
A530006G24Rik	-1.25165	-1.25011	-1.2511	-1.25165	-1.25095	-1.24589	0.346473	-0.991849	4.04905	-0.244959	0.806489	NA	0.00219631	-1.25022
A530013C23Rik	5.14822	5.95847	5.20943	5.08614	5.22217	5.1495	54.9752	3.31606	1.29235	2.56592	0.0102903	0.0721579	0.328376	5.29565
A530016L24Rik	4.00656	3.93246	3.98421	3.97308	3.93111	4.14286	16.7786	-0.223387	2.05376	-0.10877	0.913385	0.962818	0.0782137	3.99505
A530032D15Rik	0	0	0	0	0	0	0	NA	NA	NA	NA	NA	0	0
A530046M15	7.46033	7.47525	7.66655	7.45008	7.71909	7.73599	195.619	-0.298184	0.519957	-0.573479	0.56632	0.778981	0.136542	7.58455
A530050N04Rik	-0.0610123	-0.0633226	-0.0642395	-0.0624398	-0.0642317	-0.0490737	0.92209	-0.691802	3.92037	-0.176463	0.85993	NA	0.00583389	-0.0607199
A530053G22Rik	0	0	0	0	0	0	0	NA	NA	NA	NA	NA	0	0
A530054K11Rik	8.57648	7.35212	8.10545	8.17657	8.23347	8.22573	305.836	-0.722051	0.734834	-0.982605	0.325802	0.597427	0.406217	8.11164
A530058N18Rik	0	0	0	0	0	0	0	NA	NA	NA	NA	NA	0	0
A530064D06Rik	5.8219	5.96257	5.82854	5.79602	5.9898	5.81075	59.7895	0.0940701	0.839496	0.112055	0.910779	0.961472	0.0847584	5.86826
A530065N20	1.93177	1.92453	1.91945	1.92816	1.9502	1.92284	3.82483	-0.75474	2.58139	-0.292377	0.769999	NA	0.0110048	1.92949
A530072M11Rik	2.16692	2.16235	2.20267	2.18478	2.16201	2.19752	4.56253	-0.378094	3.27979	-0.11528	0.908223	NA	0.0181515	2.17938
A530088E08Rik	-0.861302	-0.868411	-0.86966	-0.869889	-0.869475	-0.869875	0.439932	2.05829	4.0135	0.512842	0.608062	NA	0.00337602	-0.868102
A530098C11Rik	-1.23013	-1.22844	-1.22338	-1.23013	-1.2294	-1.22979	0.39854	1.59201	4.04776	0.393307	0.694093	NA	0.00260858	-1.22854
A530099J19Rik	0	0	0	0	0	0	0	NA	NA	NA	NA	NA	0	0
A630001G21Rik	3.85696	3.82614	3.88843	3.96477	3.82502	3.92507	15.1221	-0.896153	2.06662	-0.433632	0.664556	0.841083	0.0560998	3.88106
A630007B06Rik	10.2493	10.5589	10.3414	10.3463	10.3641	10.2091	1308.04	0.107828	0.24557	0.439093	0.660594	0.839385	0.121452	10.3449
A630010A05Rik	-1.45137	-1.45012	-1.45085	-1.44998	-1.45075	-1.449	0.255737	-1.39379	4.0447	-0.344595	0.730399	NA	0.000832632	-1.45035
A630012P03Rik	0	0	0	0	0	0	0	NA	NA	NA	NA	NA	0	0
A630019I02Rik	0	0	0	0	0	0	0	NA	NA	NA	NA	NA	0	0
A630020A06	4.83807	4.74083	4.80966	4.82002	4.76691	4.92234	28.7031	-0.630008	1.20905	-0.521077	0.602313	0.802015	0.0631049	4.81631
A630023A22Rik	3.62391	3.57916	3.62756	3.64323	3.56874	3.65021	12.3623	0.438093	1.98095	0.221154	0.824973	NA	0.033753	3.61547
A630033H20Rik	10.6765	10.1516	10.8737	10.2467	10.4515	10.9114	1554.87	0.0425518	0.289828	0.146817	0.883276	0.948127	0.319945	10.5519
A630055G03Rik	8.89925	9.51423	8.90367	9.16829	10.1011	8.98645	689.484	-0.510103	0.325558	-1.56686	0.117147	0.342315	0.471674	9.26216
A630066F11Rik	6.53686	6.39211	6.56095	6.51757	6.96638	6.62441	103.512	-0.89992	0.844943	-1.06507	0.286846	0.560685	0.195116	6.59971
A630072M18Rik	9.1198	9.3466	8.96263	8.79009	8.90572	8.586	514.546	0.716551	0.32706	2.19089	0.02846	0.143248	0.263169	8.9518
A630073D07Rik	0	0	0	0	0	0	0	NA	NA	NA	NA	NA	0	0
A630075F10Rik	5.07205	5.0914	5.11407	5.03658	4.93797	5.06381	33.768	1.44749	1.28126	1.12974	0.258586	0.53056	0.0619448	5.05265
A630076J17Rik	0	0	0	0	0	0	0	NA	NA	NA	NA	NA	0	0
A630077J23Rik	3.06527	3.05082	3.08228	3.07297	3.13866	3.08599	8.60048	-1.72417	2.29795	-0.750307	0.45307	NA	0.0301908	3.08267
A630089N07Rik	10.3093	10.5612	10.4319	10.1747	10.1694	10.393	1307.72	0.268917	0.251666	1.06855	0.285274	0.559659	0.153324	10.3399
A630095E13Rik	4.45912	4.96219	4.49643	4.50132	4.51943	4.49667	29.4155	-0.283743	1.84826	-0.153519	0.877989	0.945703	0.191901	4.57253
A630095N17Rik	2.42344	2.42418	2.43764	2.42346	2.51191	2.44776	5.63378	-2.02154	3.76118	-0.537474	0.590941	NA	0.0343546	2.44473
A730008H23Rik	-1.3254	-1.32538	-1.32606	-1.32404	-1.32596	-1.32619	0.238323	-0.0504245	3.99746	-0.0126141	0.989936	NA	0.000794408	-1.32551
A730011L01Rik	9.55592	9.04013	9.24803	9.56605	9.33321	9.28571	659.035	-0.198007	0.315761	-0.627079	0.530607	0.756494	0.199538	9.33818
A730015I17	1.36379	1.35303	1.34344	1.34526	1.35878	1.35545	2.56231	-0.687477	3.61581	-0.190131	0.849207	NA	0.0078309	1.35329
[truncated: 21,160 more rows]
